# Supplementary material for: Identification and validation of necroptosis-related gene signatures to predict clinical outcomes and therapeutic responses in acute myeloid leukemia
Source: Aging (Albany NY). 2023 Nov 21;15(24):14677–702. doi: 10.18632/aging.205231 (PMC10781507; doi:10.18632/aging.205231)
Supplement: Supplementary Figures [file aging-15-205231-s001.pdf]

SUPPLEMENTARY FIGURES

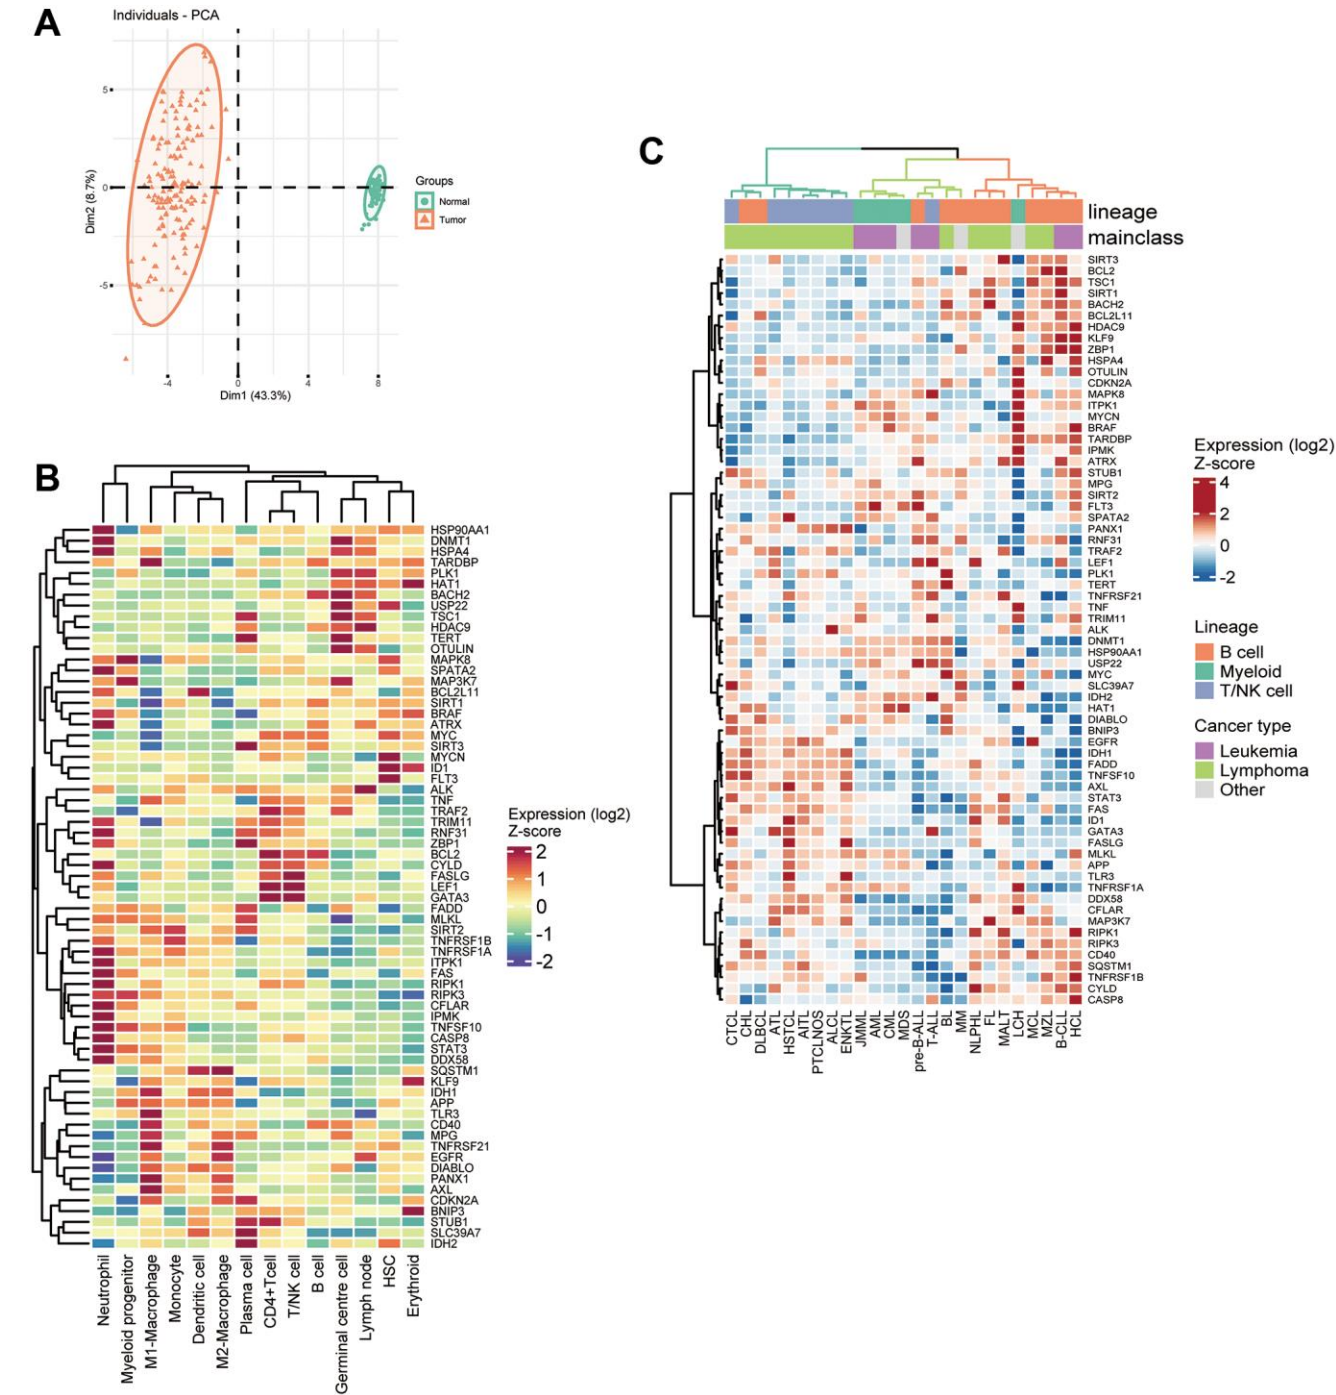

**Supplementary Figure 1. Characterization of necroptosis-related genes.** (A) Principal component analysis of 67 necroptosis-related genes based on paired tumor samples and normal samples. (B, C) Heatmap of expression of 67 necroptosis-related genes in different types of immune cells (B) and hematological malignancies (C).

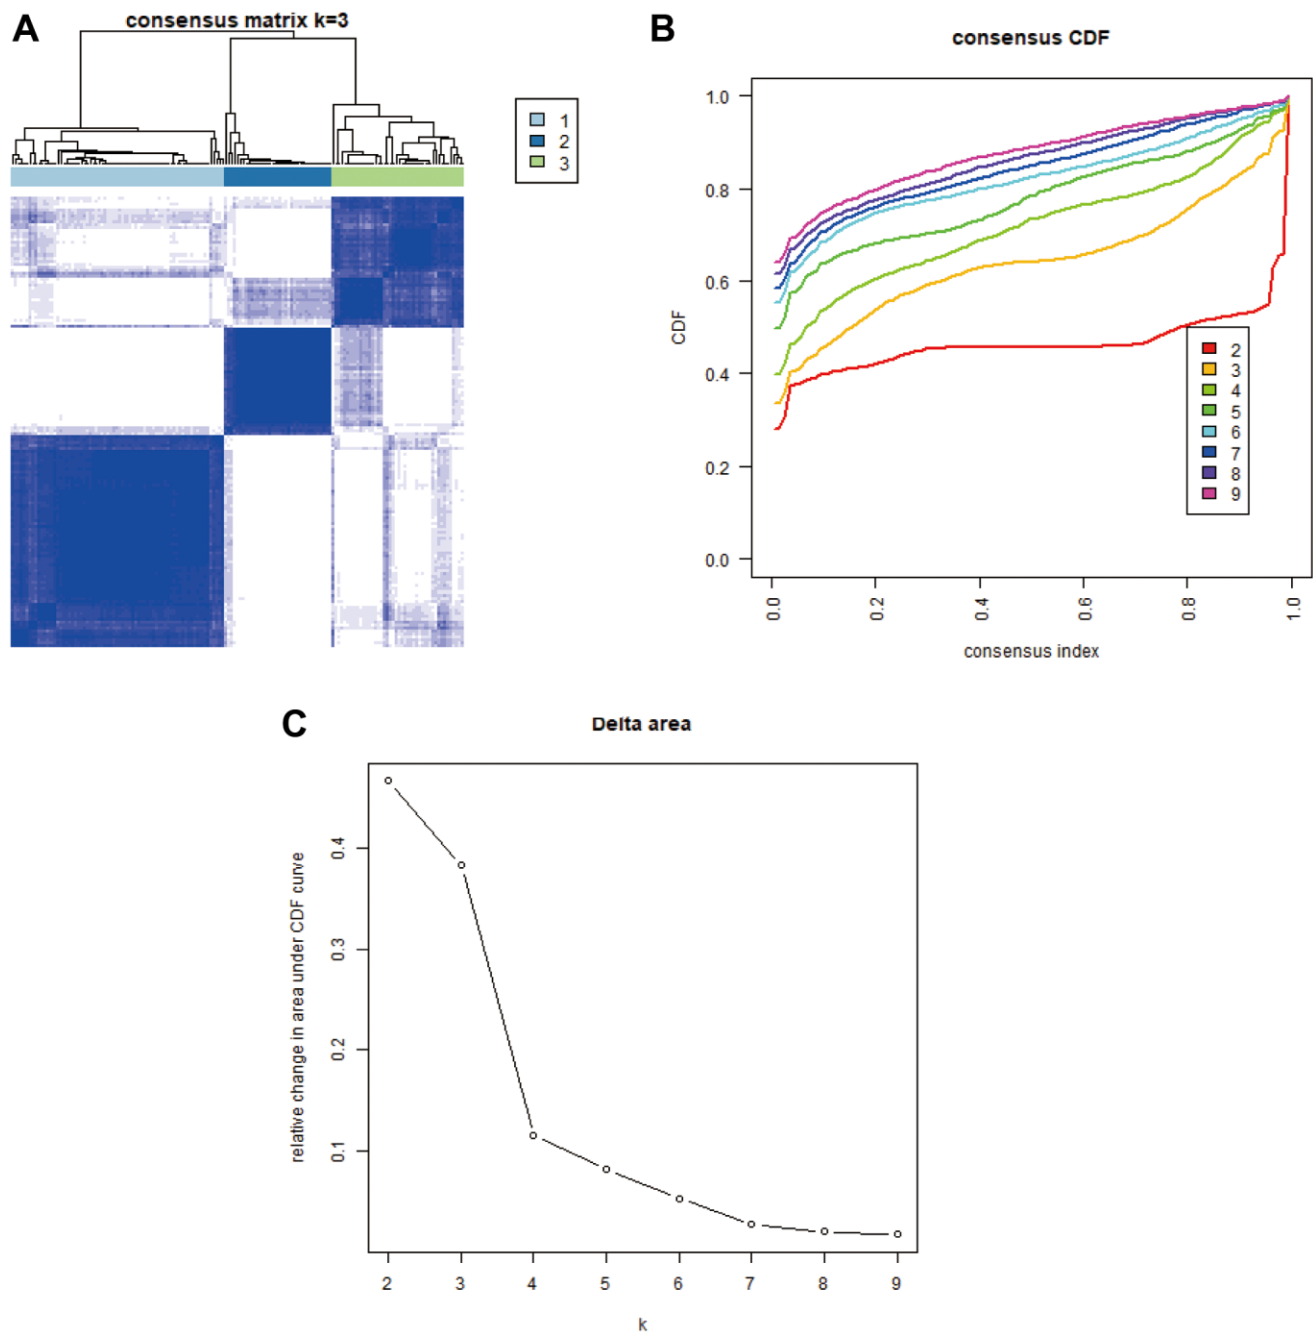

**Supplementary Figure 2. Unsupervised clustering analyses of a necroptosis signature. (A)** Concordance matrix of subtypes. **(B, C)** Cumulative distribution function presented as the relative change in area when  $k = 2-9$ .

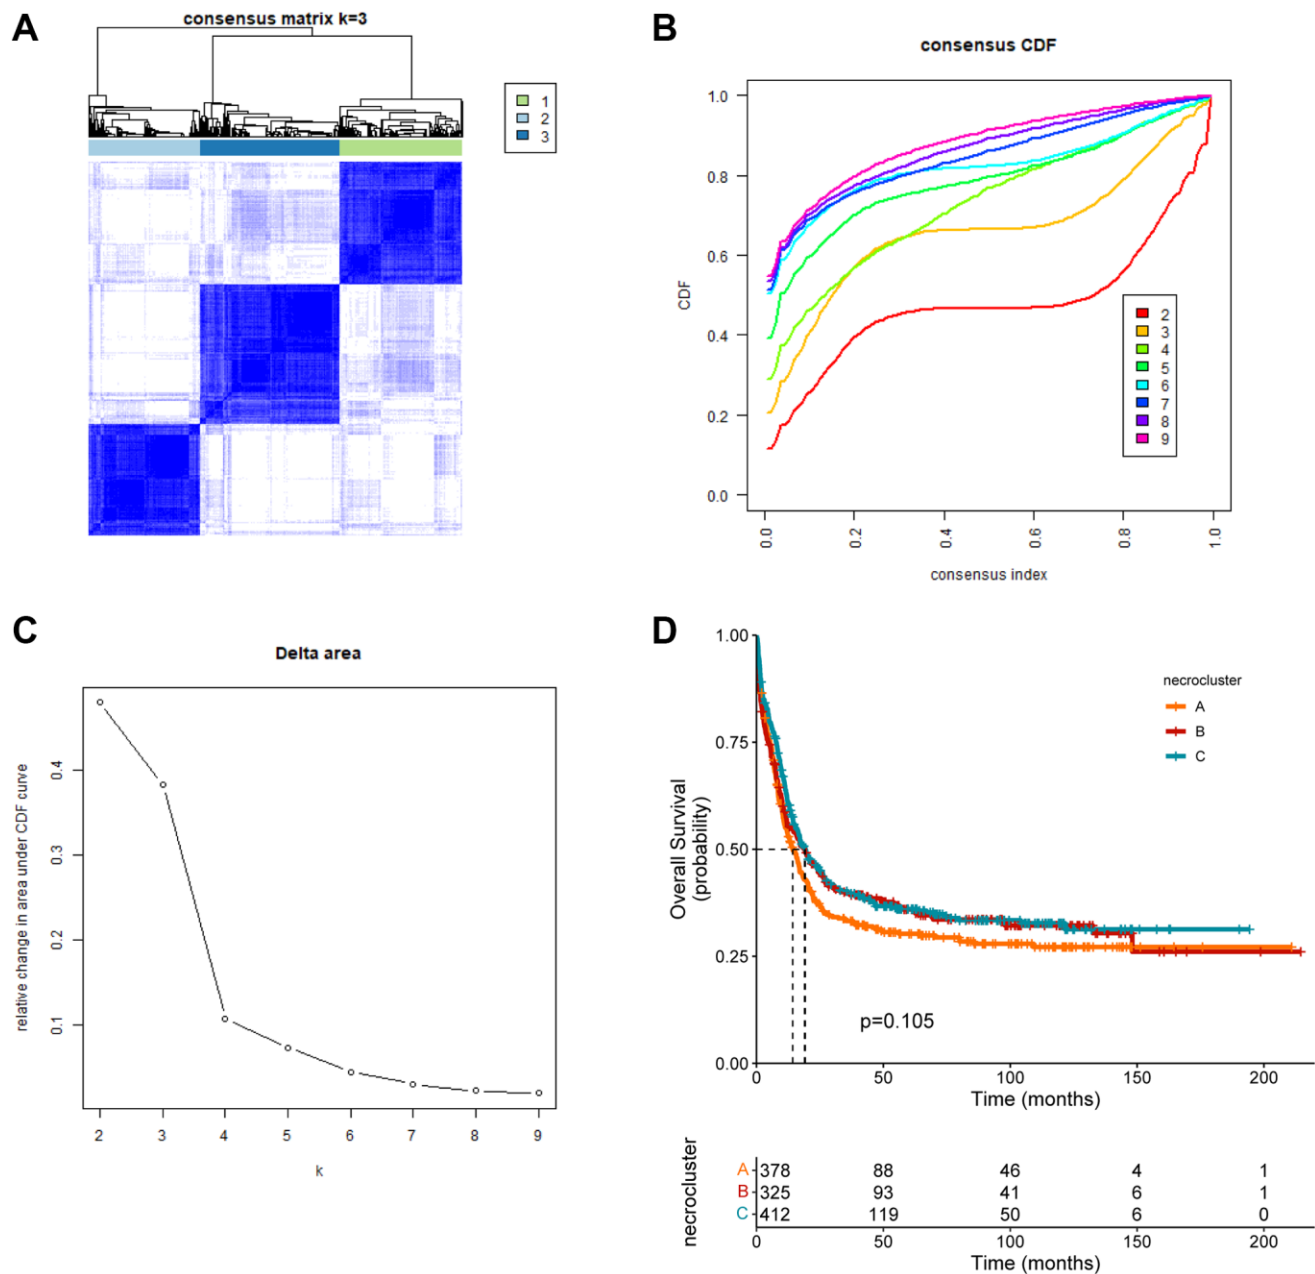

**Supplementary Figure 3. Consensus clustering analysis in combined AML cohorts encompassing six datasets (1115 patients).** (A) The concordance matrix of the subtypes was calculated. (B, C) The cumulative distribution function and relative change in area under the cumulative distribution function curve for  $k = 2-9$ . (D) Kaplan–Meier curves showing the overall survival for three clusters ( $P = 0.105$ , log-rank test).

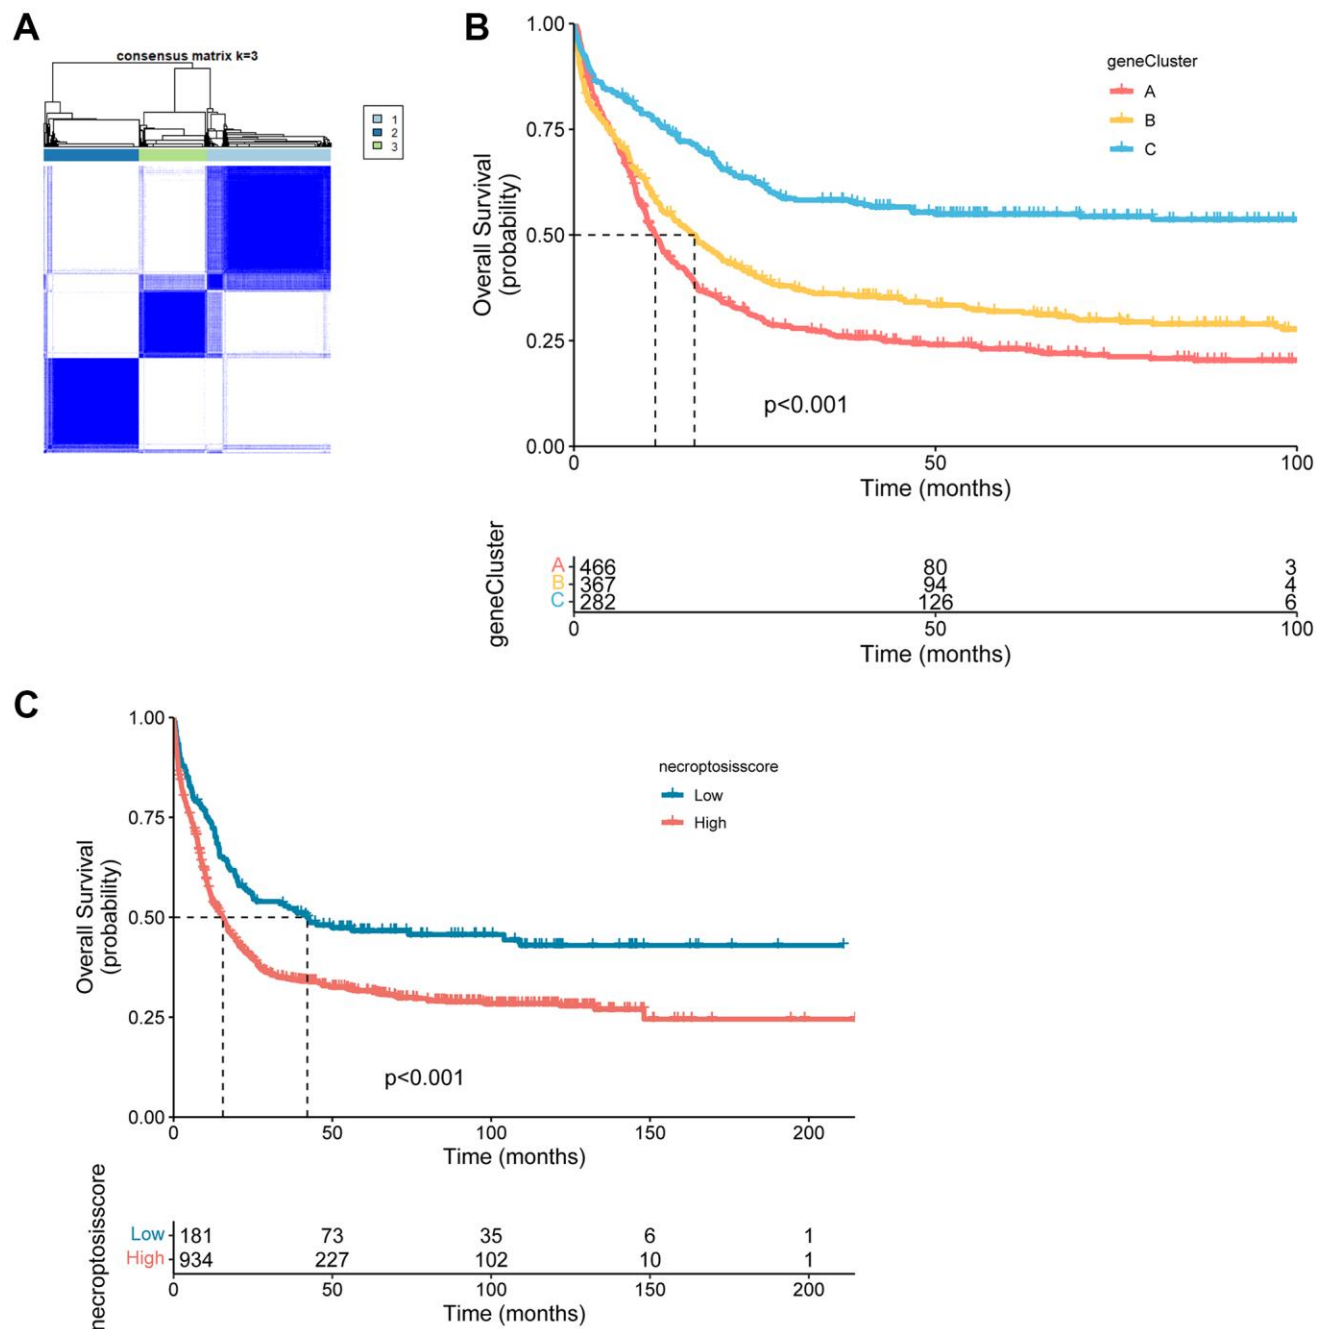

**Supplementary Figure 4. Prognosis analysis of three gene clusters and the necroptosis score in combined AML cohorts encompassing six datasets (1115 patients).** (A) Consensus matrix heatmap defining three gene clusters ( $k = 3$ ). (B) Kaplan-Meier overall survival curves of three gene clusters ( $P < 0.001$ , log-rank test). (C) Kaplan-Meier survival analysis of high versus low necroptosis score groups ( $P < 0.001$ , log-rank test).
