# Supplementary material for: Identification and validation of necroptosis-related gene signatures to predict clinical outcomes and therapeutic responses in acute myeloid leukemia
Source: publisher site journal article supplement (doi:10.18632/aging.205231), 2023-11-21
Supplement: Supplementary file [file aging-v15i24-205231-supplementary-material-SD2.pdf]

## SUPPLEMENTARY TABLES

**Supplementary Table 3. The locations of 67 necroptosis-related genes on their respective chromosomes.**

| Chromosome | chromStart | chromEnd  | Gene     |
|------------|------------|-----------|----------|
| chr1       | 11012344   | 11026420  | TARDBP   |
| chr1       | 12167003   | 12209228  | TNFRSF1B |
| chr1       | 172659018  | 172666874 | FASLG    |
| chr1       | 228393673  | 228406840 | TRIM11   |
| chr2       | 15940564   | 15947007  | MYCN     |
| chr2       | 29192774   | 29921566  | ALK      |
| chr2       | 111119378  | 111168447 | BCL2L11  |
| chr2       | 171922448  | 171983682 | HAT1     |
| chr2       | 201116104  | 201176687 | CFLAR    |
| chr2       | 201233443  | 201287711 | CASP8    |
| chr2       | 208236227  | 208266074 | IDH1     |
| chr3       | 172505508  | 172523507 | TNFSF10  |
| chr4       | 108047545  | 108168956 | LEF1     |
| chr4       | 186069152  | 186088069 | TLR3     |
| chr5       | 1253147    | 1295069   | TERT     |
| chr5       | 14664664   | 14699711  | OTULIN   |
| chr5       | 133051962  | 133106449 | HSPA4    |
| chr5       | 179806398  | 179838078 | SQSTM1   |
| chr6       | 3063991    | 3115187   | RIPK1    |
| chr6       | 31575567   | 31578336  | TNF      |
| chr6       | 33200445   | 33204439  | SLC39A7  |
| chr6       | 47231532   | 47309905  | TNFRSF21 |
| chr6       | 89926529   | 90296908  | BACH2    |
| chr6       | 90513573   | 90587045  | MAP3K7   |
| chr7       | 18086949   | 19002416  | HDAC9    |
| chr7       | 55019021   | 55256620  | EGFR     |
| chr7       | 140719327  | 140924764 | BRAF     |
| chrX       | 77504878   | 77786269  | ATRX     |
| chr8       | 127735434  | 127741434 | MYC      |
| chr9       | 21967753   | 21995301  | CDKN2A   |
| chr9       | 32455705   | 32526324  | DDX58    |
| chr9       | 70384597   | 70414624  | KLF9     |
| chr9       | 132891348  | 132944633 | TSC1     |
| chr9       | 136881912  | 136926607 | TRAF2    |
| chr11      | 215458     | 236931    | SIRT3    |
| chr11      | 70203163   | 70207390  | FADD     |
| chr11      | 94128928   | 94181972  | PANX1    |
| chr10      | 8053604    | 8075198   | GATA3    |
| chr10      | 48306639   | 48439360  | MAPK8    |
| chr10      | 58191517   | 58267934  | IPMK     |
| chr10      | 67884669   | 67918390  | SIRT1    |

|       |           |           |          |
|-------|-----------|-----------|----------|
| chr10 | 88990531  | 89015785  | FAS      |
| chr10 | 131966455 | 131982013 | BNIP3    |
| chr12 | 6328757   | 6342114   | TNFRSF1A |
| chr12 | 122207662 | 122227534 | DIABLO   |
| chr13 | 28003274  | 28100592  | FLT3     |
| chr14 | 24146683  | 24160661  | RNF31    |
| chr14 | 24336021  | 24340045  | RIPK3    |
| chr14 | 92936914  | 93116320  | ITPK1    |
| chr14 | 102080738 | 102139699 | HSP90AA1 |
| chr15 | 90083045  | 90102504  | IDH2     |
| chr16 | 77007     | 85853     | MPG      |
| chr16 | 680224    | 682870    | STUB1    |
| chr16 | 23677656  | 23690367  | PLK1     |
| chr16 | 50742050  | 50801935  | CYLD     |
| chr16 | 74671855  | 74700960  | MLKL     |
| chr17 | 20999593  | 21043760  | USP22    |
| chr17 | 42313324  | 42388568  | STAT3    |
| chr18 | 63123346  | 63320128  | BCL2     |
| chr20 | 31605283  | 31606515  | ID1      |
| chr20 | 46118272  | 46129863  | CD40     |
| chr20 | 49903391  | 49915508  | SPATA2   |
| chr20 | 57603846  | 57620576  | ZBP1     |
| chr19 | 10133345  | 10231286  | DNMT1    |
| chr19 | 38878555  | 38899862  | SIRT2    |
| chr19 | 41219203  | 41261766  | AXL      |
| chr21 | 25880550  | 26171128  | APP      |

**Supplementary Table 4. The CNV alterations of 67 necroptosis-related genes on their respective chromosomes.**

| chromosome | start     | stop      | seg.mean |
|------------|-----------|-----------|----------|
| chr1       | 11012344  | 11026420  | 1        |
| chr1       | 12167003  | 12209228  | 1        |
| chr1       | 172659018 | 172666874 | 0        |
| chr1       | 228393673 | 228406840 | 1        |
| chr2       | 15940564  | 15947007  | 0        |
| chr2       | 29192774  | 29921566  | 0        |
| chr2       | 111119378 | 111168447 | 0        |
| chr2       | 171922448 | 171983682 | 0        |
| chr2       | 201116104 | 201176687 | -1       |
| chr2       | 201233443 | 201287711 | -1       |
| chr2       | 208236227 | 208266074 | 0        |
| chr3       | 172505508 | 172523507 | 0        |
| chr4       | 108047545 | 108168956 | 0        |
| chr4       | 186069152 | 186088069 | 0        |
| chr5       | 1253147   | 1295069   | 0        |

|       |           |           |    |
|-------|-----------|-----------|----|
| chr5  | 14664664  | 14699711  | 0  |
| chr5  | 133051962 | 133106449 | -1 |
| chr5  | 179806398 | 179838078 | -1 |
| chr6  | 3063991   | 3115187   | 0  |
| chr6  | 31575567  | 31578336  | 0  |
| chr6  | 33200445  | 33204439  | 0  |
| chr6  | 47231532  | 47309905  | 0  |
| chr6  | 89926529  | 90296908  | 0  |
| chr6  | 90513573  | 90587045  | 0  |
| chr7  | 18086949  | 19002416  | -1 |
| chr7  | 55019021  | 55256620  | 0  |
| chr7  | 140719327 | 140924764 | -1 |
| chrX  | 77504878  | 77786269  | 0  |
| chr8  | 127735434 | 127741434 | 1  |
| chr9  | 21967753  | 21995301  | -1 |
| chr9  | 32455705  | 32526324  | 0  |
| chr9  | 70384597  | 70414624  | -1 |
| chr9  | 132891348 | 132944633 | 1  |
| chr9  | 136881912 | 136926607 | 1  |
| chr11 | 215458    | 236931    | 0  |
| chr11 | 70203163  | 70207390  | 1  |
| chr11 | 94128928  | 94181972  | 1  |
| chr10 | 8053604   | 8075198   | 0  |
| chr10 | 48306639  | 48439360  | 0  |
| chr10 | 58191517  | 58267934  | 0  |
| chr10 | 67884669  | 67918390  | 0  |
| chr10 | 88990531  | 89015785  | 0  |
| chr10 | 131966455 | 131982013 | 0  |
| chr12 | 6328757   | 6342114   | 0  |
| chr12 | 122207662 | 122227534 | 0  |
| chr13 | 28003274  | 28100592  | -1 |
| chr14 | 24146683  | 24160661  | -1 |
| chr14 | 24336021  | 24340045  | -1 |
| chr14 | 92936914  | 93116320  | 0  |
| chr14 | 102080738 | 102139699 | 0  |
| chr15 | 90083045  | 90102504  | 0  |
| chr16 | 77007     | 85853     | 0  |
| chr16 | 680224    | 682870    | 0  |
| chr16 | 23677656  | 23690367  | 0  |
| chr16 | 50742050  | 50801935  | 1  |
| chr16 | 74671855  | 74700960  | -1 |
| chr17 | 20999593  | 21043760  | 0  |
| chr17 | 42313324  | 42388568  | -1 |
| chr18 | 63123346  | 63320128  | 0  |
| chr20 | 31605283  | 31606515  | 1  |

|       |          |          |    |
|-------|----------|----------|----|
| chr20 | 46118272 | 46129863 | -1 |
| chr20 | 49903391 | 49915508 | -1 |
| chr20 | 57603846 | 57620576 | 1  |
| chr19 | 10133345 | 10231286 | 1  |
| chr19 | 38878555 | 38899862 | 1  |
| chr19 | 41219203 | 41261766 | 1  |
| chr21 | 25880550 | 26171128 | -1 |

**Supplementary Table 6. The results of univariate Cox regression analysis of 67 necroptosis-related genes in AML.**

| ID       | HR          | HR.95L      | HR.95H      | P-value     | km          |
|----------|-------------|-------------|-------------|-------------|-------------|
| SIRT1    | 0.653185005 | 0.378242712 | 1.127981155 | 0.126532966 | 0.0141689   |
| SIRT2    | 2.184984848 | 1.310189482 | 3.643868962 | 0.00274144  | 0.000156203 |
| IPMK     | 0.832128264 | 0.576823465 | 1.200432177 | 0.325662055 | 0.114827499 |
| FLT3     | 1.145843585 | 0.941964664 | 1.39385008  | 0.173235112 | 0.005395313 |
| DDX58    | 1.078687703 | 0.714994691 | 1.627378742 | 0.718089398 | 0.089256771 |
| AXL      | 0.893148058 | 0.616525233 | 1.293886138 | 0.550144066 | 0.003022712 |
| HAT1     | 1.879445439 | 1.059558298 | 3.333761968 | 0.030942926 | 0.002192668 |
| TRIM11   | 1.692538231 | 0.908277659 | 3.1539757   | 0.097514088 | 0.01034464  |
| MYC      | 0.991110343 | 0.817531286 | 1.201543879 | 0.927573176 | 0.164023709 |
| PLK1     | 0.978689975 | 0.754347237 | 1.269752204 | 0.871185873 | 0.02396733  |
| MPG      | 1.377101107 | 0.988070387 | 1.919304011 | 0.058877071 | 0.000623289 |
| TNFRSF1B | 1.163894293 | 1.030802172 | 1.314170617 | 0.014301022 | 0.002521854 |
| CASP8    | 1.300459795 | 0.701888456 | 2.409493508 | 0.403741253 | 0.148505378 |
| RNF31    | 1.311566439 | 0.7462553   | 2.305117998 | 0.345845229 | 0.142074969 |
| TSC1     | 0.865754449 | 0.518796244 | 1.444749792 | 0.581131898 | 0.003174917 |
| PANX1    | 1.781511256 | 1.21093007  | 2.620946026 | 0.003372425 | 0.003850982 |
| TLR3     | 0.768912602 | 0.442353635 | 1.336547374 | 0.351558403 | 0.103295508 |
| DIABLO   | 0.448302915 | 0.191224639 | 1.050991677 | 0.064956574 | 0.00054681  |
| EGFR     | 0.162124498 | 0.009434344 | 2.786028751 | 0.209898964 | 0.002225816 |
| MYCN     | 0.900484343 | 0.792057853 | 1.023753566 | 0.109303252 | 0.03588317  |
| SLC39A7  | 0.828131159 | 0.477791165 | 1.435357676 | 0.501561935 | 0.017329371 |
| FAS      | 0.885475167 | 0.594179178 | 1.319578841 | 0.55013449  | 0.029230075 |
| SQSTM1   | 1.135111031 | 0.772580721 | 1.66775719  | 0.518550154 | 0.015239662 |
| BACH2    | 1.133161573 | 0.874854048 | 1.467736424 | 0.343599343 | 0.040783794 |
| ATRX     | 0.916901721 | 0.617217044 | 1.362095836 | 0.66746871  | 0.198735659 |
| HDAC9    | 1.155183906 | 0.95236621  | 1.40119404  | 0.14305802  | 0.002137129 |
| ZBP1     | 1.68624203  | 1.124616735 | 2.52833885  | 0.011463859 | 0.001224679 |
| MAPK8    | 0.697286568 | 0.417564651 | 1.164391087 | 0.16814127  | 0.223565352 |
| BNIP3    | 0.577742784 | 0.381540903 | 0.874838641 | 0.009552699 | 0.003061902 |
| RIPK1    | 1.045134946 | 0.493019116 | 2.215547064 | 0.908319629 | 0.044349595 |
| ALK      | 2.600097719 | 0.8630238   | 7.833512993 | 0.08947663  | 0.001249055 |
| BCL2L11  | 1.468472638 | 1.126975312 | 1.913450868 | 0.004439423 | 0.002552374 |
| BRAF     | 0.480067011 | 0.27963122  | 0.824172405 | 0.007785274 | 0.001083898 |

|          |             |             |             |             |             |
|----------|-------------|-------------|-------------|-------------|-------------|
| HSPA4    | 1.301501392 | 0.809385541 | 2.092829423 | 0.276884707 | 0.006134598 |
| TERT     | 1.32265337  | 0.953263779 | 1.83518138  | 0.094224722 | 0.001181906 |
| MLKL     | 1.043130146 | 0.728780155 | 1.49307098  | 0.817482411 | 0.149133862 |
| BCL2     | 0.823515447 | 0.640900027 | 1.058164554 | 0.129018388 | 0.007601644 |
| ITPK1    | 1.897746809 | 1.33293067  | 2.701898179 | 0.000379003 | 1.31422E-05 |
| CYLD     | 1.445531804 | 0.814540202 | 2.565327272 | 0.208012226 | 0.015127248 |
| DNMT1    | 1.519224994 | 0.89849651  | 2.568785251 | 0.118627464 | 0.001731079 |
| FADD     | 2.752830445 | 1.553552027 | 4.877902591 | 0.000521882 | 1.1015E-07  |
| TNF      | 0.878746969 | 0.738113019 | 1.046176149 | 0.146321965 | 0.009964063 |
| KLF9     | 1.296480875 | 1.068129904 | 1.573650033 | 0.008621241 | 0.001611377 |
| IDH2     | 1.259520778 | 0.806763049 | 1.966367439 | 0.310013134 | 0.099546954 |
| TRAF2    | 1.056712493 | 0.638818732 | 1.74797832  | 0.829909929 | 0.036640337 |
| HSP90AA1 | 1.316781385 | 0.903432252 | 1.919250958 | 0.15224634  | 0.007182229 |
| RIPK3    | 1.420721389 | 1.033504631 | 1.953014245 | 0.030545089 | 0.001200498 |
| FASLG    | 1.041890084 | 0.639615345 | 1.697168392 | 0.869069192 | 0.028144583 |
| CD40     | 1.206387454 | 0.932591082 | 1.560566809 | 0.153119006 | 0.000667904 |
| SPATA2   | 0.746521175 | 0.406950179 | 1.369440027 | 0.344998987 | 0.055968205 |
| ID1      | 1.200475632 | 1.006408247 | 1.431965354 | 0.042258402 | 0.000194623 |
| LEF1     | 0.917595921 | 0.749311916 | 1.12367394  | 0.405440668 | 0.012767755 |
| GATA3    | 1.015865859 | 0.786799863 | 1.31162128  | 0.903895127 | 0.06558502  |
| CDKN2A   | 1.081608681 | 0.843680642 | 1.386635276 | 0.535970717 | 0.002878496 |
| STAT3    | 0.683169486 | 0.389810292 | 1.197301752 | 0.183207074 | 0.030650878 |
| TNFRSF21 | 1.106554528 | 0.929281323 | 1.317645037 | 0.25569587  | 0.076153834 |
| IDH1     | 1.42470344  | 1.011777604 | 2.006152228 | 0.0426608   | 0.000541714 |
| CFLAR    | 0.941588305 | 0.597826846 | 1.48301894  | 0.795109628 | 0.217209513 |
| SIRT3    | 0.839786189 | 0.481646278 | 1.464229821 | 0.538170095 | 0.048744659 |
| MAP3K7   | 1.055232867 | 0.516374652 | 2.156411823 | 0.882787486 | 0.084903579 |
| TARDBP   | 1.462416141 | 0.705296405 | 3.032286788 | 0.306980494 | 0.033807403 |
| APP      | 0.912122011 | 0.828108786 | 1.004658539 | 0.062084379 | 0.000465397 |
| TNFSF10  | 1.015918702 | 0.860748485 | 1.199062012 | 0.851850785 | 0.162765083 |
| OTULIN   | 0.765242099 | 0.427404261 | 1.370120806 | 0.36793924  | 0.051735805 |
| TNFRSF1A | 0.811636879 | 0.482530203 | 1.365208682 | 0.431505516 | 0.07905431  |
| USP22    | 0.997466291 | 0.578531952 | 1.719765    | 0.992716961 | 0.241687143 |
| STUB1    | 1.516106553 | 0.973929262 | 2.36010886  | 0.065332889 | 0.000233725 |

**Supplementary Table 13. The univariate analyses of necroptisscore in the TCGA.**

| Beta     | HR (95% CI for HR)    | wald.test | P-value   | variables |
|----------|-----------------------|-----------|-----------|-----------|
| 0.03893  | 1.04 (1.025–1.055)    | 26.96     | 2.074e-07 | AGE       |
| 1.183    | 3.264 (2.175–4.898)   | 32.65     | 1.104e-08 | AGEcat    |
| 0.005017 | 1.005 (1.001–1.009)   | 5.42      | 0.01995   | WBC       |
| 0.2223   | 1.249 (0.8345–1.869)  | 1.17      | 0.28      | WBCcat    |
| 0.146    | 1.157 (0.667–2.008)   | 0.27      | 0.6034    | FLT3_n    |
| -0.02775 | 0.9726 (0.4897–1.932) | 0.01      | 0.9368    | CEBPA     |
| 0.1453   | 1.156 (0.7373–1.813)  | 0.4       | 0.5269    | NPM_n     |

|         |                       |       |           |                        |
|---------|-----------------------|-------|-----------|------------------------|
| 1.63    | 5.105 (2.642–9.861)   | 23.55 | 1.219e-06 | TP53                   |
| -0.2314 | 0.7934 (0.3846–1.637) | 0.39  | 0.531     | IDH1_n                 |
| 0.01886 | 1.019 (0.5422–1.915)  | 0     | 0.9533    | IDH2_n                 |
| 0.6019  | 1.826 (1.159–2.876)   | 6.74  | 0.009435  | DNMT3A                 |
| 0.7677  | 2.155 (1.164–3.988)   | 5.98  | 0.01451   | RUNX1                  |
| 0.6329  | 1.883 (1.39–2.551)    | 16.71 | 4.344e-05 | RISK                   |
| 2.038   | 7.673 (2.424–24.29)   | 12.01 | 0.0005283 | necroptosisscore_group |
| 0.02592 | 1.026 (1.012–1.041)   | 12.74 | 0.000357  | necroptosisscore       |

---
