# Supplementary material for: Identification and validation of necroptosis-related gene signatures to predict clinical outcomes and therapeutic responses in acute myeloid leukemia
Source: Aging (Albany NY). 2023 Nov 21;15(24):14677–702. doi: 10.18632/aging.205231 (PMC10781507; doi:10.18632/aging.205231)
Supplement: Supplementary Tables 1-2, 5, 7-12 and 14 [file aging-15-205231-s003.xlsx]

## Sheet: Supplementary Table 1
Supplementary Table 1. A total of 67 necroptosis-related genes in the study.
Genes	Source
FADD	necroptosis geneset M24779.gmt
FAS	necroptosis geneset M24779.gmt
FASLG	necroptosis geneset M24779.gmt
MLKL	necroptosis geneset M24779.gmt
RIPK1	necroptosis geneset M24779.gmt
RIPK3	necroptosis geneset M24779.gmt
TLR3	necroptosis geneset M24779.gmt
TNF	necroptosis geneset M24779.gmt
TSC1	Xie Y, Zhao Y, Shi L, Li W, Chen K, Li M, Chen X, Zhang H, Li T, Matsuzawa-Ishimoto Y, Yao X, Shao D, Ke Z, Li J, Chen Y, Zhang X, Cui J, Cui S, Leng Q, Cadwell K, Li X, Wei H, Zhang H, Li H, Xiao H. Gut epithelial TSC1/mTOR controls RIPK3-dependent necroptosis in intestinal inflammation and cancer. J Clin Invest. 2020 Apr 1;130(4):2111-2128. doi: 10.1172/JCI133264. PMID: 31961824; PMCID: PMC7108…
TRIM11	Xie Y, Zhao Y, Shi L, Li W, Chen K, Li M, Chen X, Zhang H, Li T, Matsuzawa-Ishimoto Y, Yao X, Shao D, Ke Z, Li J, Chen Y, Zhang X, Cui J, Cui S, Leng Q, Cadwell K, Li X, Wei H, Zhang H, Li H, Xiao H. Gut epithelial TSC1/mTOR controls RIPK3-dependent necroptosis in intestinal inflammation and cancer. J Clin Invest. 2020 Apr 1;130(4):2111-2128. doi: 10.1172/JCI133264. PMID: 31961824; PMCID: PMC7108…
CASP8	Fritsch M, Günther SD, Schwarzer R, Albert MC, Schorn F, Werthenbach JP, Schiffmann LM, Stair N, Stocks H, Seeger JM, Lamkanfi M, Krönke M, Pasparakis M, Kashkar H. Caspase-8 is the molecular switch for apoptosis, necroptosis and pyroptosis. Nature. 2019 Nov;575(7784):683-687. doi: 10.1038/s41586-019-1770-6. Epub 2019 Nov 20. PMID: 31748744.
ZBP1	Yang D, Liang Y, Zhao S, Ding Y, Zhuang Q, Shi Q, Ai T, Wu SQ, Han J. ZBP1 mediates interferon-induced necroptosis. Cell Mol Immunol. 2020 Apr;17(4):356-368. doi: 10.1038/s41423-019-0237-x. Epub 2019 May 10. PMID: 31076724; PMCID: PMC7109092.
MAPK8	Wang Y, Zhao M, He S, Luo Y, Zhao Y, Cheng J, Gong Y, Xie J, Wang Y, Hu B, Tian L, Liu X, Li C, Huang Q. Necroptosis regulates tumor repopulation after radiotherapy via RIP1/RIP3/MLKL/JNK/IL8 pathway. J Exp Clin Cancer Res. 2019 Nov 9;38(1):461. doi: 10.1186/s13046-019-1423-5. PMID: 31706322; PMCID: PMC6842489.
IPMK	Dovey CM, Diep J, Clarke BP, Hale AT, McNamara DE, Guo H, Brown NW Jr, Cao JY, Grace CR, Gough PJ, Bertin J, Dixon SJ, Fiedler D, Mocarski ES, Kaiser WJ, Moldoveanu T, York JD, Carette JE. MLKL Requires the Inositol Phosphate Code to Execute Necroptosis. Mol Cell. 2018 Jun 7;70(5):936-948.e7. doi: 10.1016/j.molcel.2018.05.010. Epub 2018 Jun 7. PMID: 29883610; PMCID: PMC5994928.
ITPK1	Dovey CM, Diep J, Clarke BP, Hale AT, McNamara DE, Guo H, Brown NW Jr, Cao JY, Grace CR, Gough PJ, Bertin J, Dixon SJ, Fiedler D, Mocarski ES, Kaiser WJ, Moldoveanu T, York JD, Carette JE. MLKL Requires the Inositol Phosphate Code to Execute Necroptosis. Mol Cell. 2018 Jun 7;70(5):936-948.e7. doi: 10.1016/j.molcel.2018.05.010. Epub 2018 Jun 7. PMID: 29883610; PMCID: PMC5994928.
SIRT3	Tang X, Li Y, Liu L, Guo R, Zhang P, Zhang Y, Zhang Y, Zhao J, Su J, Sun L, Liu Y. Sirtuin 3 induces apoptosis and necroptosis by regulating mutant p53 expression in small‑cell lung cancer. Oncol Rep. 2020 Feb;43(2):591-600. doi: 10.3892/or.2019.7439. Epub 2019 Dec 17. PMID: 31894331.
MYC	Seong D, Jeong M, Seo J, Lee JY, Hwang CH, Shin HC, Shin JY, Nam YW, Jo JY, Lee H, Kim HJ, Kim HR, Oh JH, Ha SJ, Kim SJ, Roe JS, Kim W, Cheong JW, Bae KH, Lee SC, Oberst A, Vandenabeele P, Shin DH, Lee EW, Song J. Identification of MYC as an antinecroptotic protein that stifles RIPK1-RIPK3 complex formation. Proc Natl Acad Sci U S A. 2020 Aug 18;117(33):19982-19993. doi: 10.1073/pnas.2000979117. …
TNFRSF1A	Seifert L, Werba G, Tiwari S, Giao Ly NN, Alothman S, Alqunaibit D, Avanzi A, Barilla R, Daley D, Greco SH, Torres-Hernandez A, Pergamo M, Ochi A, Zambirinis CP, Pansari M, Rendon M, Tippens D, Hundeyin M, Mani VR, Hajdu C, Engle D, Miller G. The necrosome promotes pancreatic oncogenesis via CXCL1 and Mincle-induced immune suppression. Nature. 2016 Apr 14;532(7598):245-9. doi: 10.1038/nature17403…
TNFSF10	Seifert L, Werba G, Tiwari S, Giao Ly NN, Alothman S, Alqunaibit D, Avanzi A, Barilla R, Daley D, Greco SH, Torres-Hernandez A, Pergamo M, Ochi A, Zambirinis CP, Pansari M, Rendon M, Tippens D, Hundeyin M, Mani VR, Hajdu C, Engle D, Miller G. The necrosome promotes pancreatic oncogenesis via CXCL1 and Mincle-induced immune suppression. Nature. 2016 Apr 14;532(7598):245-9. doi: 10.1038/nature17403…
TNFRSF1B	Borghi A, Verstrepen L, Beyaert R. TRAF2 multitasking in TNF receptor-induced signaling to NF-κB, MAP kinases and cell death. Biochem Pharmacol. 2016 Sep 15;116:1-10. doi: 10.1016/j.bcp.2016.03.009. Epub 2016 Mar 16. PMID: 26993379.
TRAF2	Borghi A, Verstrepen L, Beyaert R. TRAF2 multitasking in TNF receptor-induced signaling to NF-κB, MAP kinases and cell death. Biochem Pharmacol. 2016 Sep 15;116:1-10. doi: 10.1016/j.bcp.2016.03.009. Epub 2016 Mar 16. PMID: 26993379.
PANX1	Douanne T, André-Grégoire G, Trillet K, Thys A, Papin A, Feyeux M, Hulin P, Chiron D, Gavard J, Bidère N. Pannexin-1 limits the production of proinflammatory cytokines during necroptosis. EMBO Rep. 2019 Oct 4;20(10):e47840. doi: 10.15252/embr.201947840. Epub 2019 Aug 14. PMID: 31410978; PMCID: PMC6776911.
OTULIN	Heger K, Wickliffe KE, Ndoja A, Zhang J, Murthy A, Dugger DL, Maltzman A, de Sousa E Melo F, Hung J, Zeng Y, Verschueren E, Kirkpatrick DS, Vucic D, Lee WP, Roose-Girma M, Newman RJ, Warming S, Hsiao YC, Kőműves LG, Webster JD, Newton K, Dixit VM. OTULIN limits cell death and inflammation by deubiquitinating LUBAC. Nature. 2018 Jul;559(7712):120-124. doi: 10.1038/s41586-018-0256-2. Epub 2018 Jun …
CYLD	Lork M, Verhelst K, Beyaert R. CYLD, A20 and OTULIN deubiquitinases in NF-κB signaling and cell death: so similar, yet so different. Cell Death Differ. 2017 Jul;24(7):1172-1183. doi: 10.1038/cdd.2017.46. Epub 2017 Mar 31. PMID: 28362430; PMCID: PMC5520167.
USP22	Roedig J, Kowald L, Juretschke T, Karlowitz R, Ahangarian Abhari B, Roedig H, Fulda S, Beli P, van Wijk SJ. USP22 controls necroptosis by regulating receptor-interacting protein kinase 3 ubiquitination. EMBO Rep. 2021 Feb 3;22(2):e50163. doi: 10.15252/embr.202050163. Epub 2020 Dec 28. PMID: 33369872; PMCID: PMC7857539.
MAP3K7	Goodall ML, Fitzwalter BE, Zahedi S, Wu M, Rodriguez D, Mulcahy-Levy JM, Green DR, Morgan M, Cramer SD, Thorburn A. The Autophagy Machinery Controls Cell Death Switching between Apoptosis and Necroptosis. Dev Cell. 2016 May 23;37(4):337-349. doi: 10.1016/j.devcel.2016.04.018. PMID: 27219062; PMCID: PMC4886731.
SQSTM1	Goodall ML, Fitzwalter BE, Zahedi S, Wu M, Rodriguez D, Mulcahy-Levy JM, Green DR, Morgan M, Cramer SD, Thorburn A. The Autophagy Machinery Controls Cell Death Switching between Apoptosis and Necroptosis. Dev Cell. 2016 May 23;37(4):337-349. doi: 10.1016/j.devcel.2016.04.018. PMID: 27219062; PMCID: PMC4886731.
STAT3	Wang X, Shao X, Gu L, Jiang K, Wang S, Chen J, Fang J, Guo X, Yuan M, Shi J, Ding C, Meng S, Xu Q. Targeting STAT3 enhances NDV-induced immunogenic cell death in prostate cancer cells. J Cell Mol Med. 2020 Apr;24(7):4286-4297. doi: 10.1111/jcmm.15089. Epub 2020 Feb 26. PMID: 32100392; PMCID: PMC7171322.
DIABLO	McComb S, Aguadé-Gorgorió J, Harder L, Marovca B, Cario G, Eckert C, Schrappe M, Stanulla M, von Stackelberg A, Bourquin JP, Bornhauser BC. Activation of concurrent apoptosis and necroptosis by SMAC mimetics for the treatment of refractory and relapsed ALL. Sci Transl Med. 2016 May 18;8(339):339ra70. doi: 10.1126/scitranslmed.aad2986. PMID: 27194728.
DNMT1	Smith AD, Lu C, Payne D, Paschall AV, Klement JD, Redd PS, Ibrahim ML, Yang D, Han Q, Liu Z, Shi H, Hartney TJ, Nayak-Kapoor A, Liu K. Autocrine IL6-Mediated Activation of the STAT3-DNMT Axis Silences the TNFα-RIP1 Necroptosis Pathway to Sustain Survival and Accumulation of Myeloid-Derived Suppressor Cells. Cancer Res. 2020 Aug 1;80(15):3145-3156. doi: 10.1158/0008-5472.CAN-19-3670. Epub 2020 Jun…
CFLAR	Fiore A, Ugel S, De Sanctis F, Sandri S, Fracasso G, Trovato R, Sartoris S, Solito S, Mandruzzato S, Vascotto F, Hippen KL, Mondanelli G, Grohmann U, Piro G, Carbone C, Melisi D, Lawlor RT, Scarpa A, Lamolinara A, Iezzi M, Fassan M, Bicciato S, Blazar BR, Sahin U, Murray PJ, Bronte V. Induction of immunosuppressive functions and NF-κB by FLIP in monocytes. Nat Commun. 2018 Dec 5;9(1):5193. doi: 1…
BRAF	Najafov A, Zervantonakis IK, Mookhtiar AK, Greninger P, March RJ, Egan RK, Luu HS, Stover DG, Matulonis UA, Benes CH, Yuan J. BRAF and AXL oncogenes drive RIPK3 expression loss in cancer. PLoS Biol. 2018 Aug 29;16(8):e2005756. doi: 10.1371/journal.pbio.2005756. PMID: 30157175; PMCID: PMC6114281.
AXL	Najafov A, Zervantonakis IK, Mookhtiar AK, Greninger P, March RJ, Egan RK, Luu HS, Stover DG, Matulonis UA, Benes CH, Yuan J. BRAF and AXL oncogenes drive RIPK3 expression loss in cancer. PLoS Biol. 2018 Aug 29;16(8):e2005756. doi: 10.1371/journal.pbio.2005756. PMID: 30157175; PMCID: PMC6114281.
ID1	Tan HY, Wang N, Chan YT, Zhang C, Guo W, Chen F, Zhong Z, Li S, Feng Y. ID1 overexpression increases gefitinib sensitivity in non-small cell lung cancer by activating RIP3/MLKL-dependent necroptosis. Cancer Lett. 2020 Apr 10;475:109-118. doi: 10.1016/j.canlet.2020.01.025. Epub 2020 Jan 28. PMID: 32004572.
CDKN2A	Medrano RFV, Hunger A, Catani JPP, Strauss BE. Uncovering the immunotherapeutic cycle initiated by p19Arf and interferon-β gene transfer to cancer cells: An inducer of immunogenic cell death. Oncoimmunology. 2017 May 19;6(7):e1329072. doi: 10.1080/2162402X.2017.1329072. PMID: 28811972; PMCID: PMC5543818.
HSPA4	Johnston AN, Ma Y, Liu H, Liu S, Hanna-Addams S, Chen S, Chen C, Wang Z. Necroptosis-blocking compound NBC1 targets heat shock protein 70 to inhibit MLKL polymerization and necroptosis. Proc Natl Acad Sci U S A. 2020 Mar 24;117(12):6521-6530. doi: 10.1073/pnas.1916503117. Epub 2020 Mar 10. PMID: 32156734; PMCID: PMC7104336.
BCL2	Lee KM, Lee H, Han D, Moon WK, Kim K, Oh HJ, Choi J, Hwang EH, Kang SE, Im SA, Lee KH, Ryu HS. Combined the SMAC mimetic and BCL2 inhibitor sensitizes neoadjuvant chemotherapy by targeting necrosome complexes in tyrosine aminoacyl-tRNA synthase-positive breast cancer. Breast Cancer Res. 2020 Nov 25;22(1):130. doi: 10.1186/s13058-020-01367-7. PMID: 33239070; PMCID: PMC7687715.
STUB1	Tang MB, Li YS, Li SH, Cheng Y, Zhang S, Luo HY, Mao CY, Hu ZW, Schisler JC, Shi CH, Xu YM. Anisomycin prevents OGD-induced necroptosis by regulating the E3 ligase CHIP. Sci Rep. 2018 Apr 23;8(1):6379. doi: 10.1038/s41598-018-24414-y. PMID: 29686306; PMCID: PMC5913227.
FLT3	Hillert LK, Bettermann-Bethge K, Nimmagadda SC, Fischer T, Naumann M, Lavrik IN. Targeting RIPK1 in AML cells carrying FLT3-ITD. Int J Cancer. 2019 Sep 15;145(6):1558-1569. doi: 10.1002/ijc.32246. Epub 2019 Mar 23. PMID: 30828789.
HAT1	Carafa V, Nebbioso A, Cuomo F, Rotili D, Cobellis G, Bontempo P, Baldi A, Spugnini EP, Citro G, Chambery A, Russo R, Ruvo M, Ciana P, Maravigna L, Shaik J, Radaelli E, De Antonellis P, Tarantino D, Pirolli A, Ragno R, Zollo M, Stunnenberg HG, Mai A, Altucci L. RIP1-HAT1-SIRT Complex Identification and Targeting in Treatment and Prevention of Cancer. Clin Cancer Res. 2018 Jun 15;24(12):2886-2900. …
SIRT2	Carafa V, Nebbioso A, Cuomo F, Rotili D, Cobellis G, Bontempo P, Baldi A, Spugnini EP, Citro G, Chambery A, Russo R, Ruvo M, Ciana P, Maravigna L, Shaik J, Radaelli E, De Antonellis P, Tarantino D, Pirolli A, Ragno R, Zollo M, Stunnenberg HG, Mai A, Altucci L. RIP1-HAT1-SIRT Complex Identification and Targeting in Treatment and Prevention of Cancer. Clin Cancer Res. 2018 Jun 15;24(12):2886-2900. …
SIRT1	Carafa V, Nebbioso A, Cuomo F, Rotili D, Cobellis G, Bontempo P, Baldi A, Spugnini EP, Citro G, Chambery A, Russo R, Ruvo M, Ciana P, Maravigna L, Shaik J, Radaelli E, De Antonellis P, Tarantino D, Pirolli A, Ragno R, Zollo M, Stunnenberg HG, Mai A, Altucci L. RIP1-HAT1-SIRT Complex Identification and Targeting in Treatment and Prevention of Cancer. Clin Cancer Res. 2018 Jun 15;24(12):2886-2900. …
PLK1	Deeraksa A, Pan J, Sha Y, Liu XD, Eissa NT, Lin SH, Yu-Lee LY. Plk1 is upregulated in androgen-insensitive prostate cancer cells and its inhibition leads to necroptosis. Oncogene. 2013 Jun 13;32(24):2973-83. doi: 10.1038/onc.2012.309. Epub 2012 Aug 13. PMID: 22890325; PMCID: PMC3499666.
MPG	Allocca M, Corrigan JJ, Mazumder A, Fake KR, Samson LD. Inflammation, necrosis, and the kinase RIP3 are key mediators of AAG-dependent alkylation-induced retinal degeneration. Sci Signal. 2019 Feb 12;12(568):eaau9216. doi: 10.1126/scisignal.aau9216. PMID: 30755477; PMCID: PMC7150588.
BACH2	Petanidis S, Domvri K, Porpodis K, Anestakis D, Freitag L, Hohenforst-Schmidt W, Tsavlis D, Zarogoulidis K. Inhibition of kras-derived exosomes downregulates immunosuppressive BACH2/GATA-3 expression via RIP-3 dependent necroptosis and miR-146/miR-210 modulation. Biomed Pharmacother. 2020 Feb;122:109461. doi: 10.1016/j.biopha.2019.109461. Epub 2019 Dec 30. PMID: 31918262.
GATA3	Petanidis S, Domvri K, Porpodis K, Anestakis D, Freitag L, Hohenforst-Schmidt W, Tsavlis D, Zarogoulidis K. Inhibition of kras-derived exosomes downregulates immunosuppressive BACH2/GATA-3 expression via RIP-3 dependent necroptosis and miR-146/miR-210 modulation. Biomed Pharmacother. 2020 Feb;122:109461. doi: 10.1016/j.biopha.2019.109461. Epub 2019 Dec 30. PMID: 31918262.
MYCN	Nicolai S, Pieraccioli M, Peschiaroli A, Melino G, Raschellà G. Neuroblastoma: oncogenic mechanisms and therapeutic exploitation of necroptosis. Cell Death Dis. 2015 Dec 3;6(12):e2010. doi: 10.1038/cddis.2015.354. PMID: 26633716; PMCID: PMC4720889.
ALK	Nicolai S, Pieraccioli M, Peschiaroli A, Melino G, Raschellà G. Neuroblastoma: oncogenic mechanisms and therapeutic exploitation of necroptosis. Cell Death Dis. 2015 Dec 3;6(12):e2010. doi: 10.1038/cddis.2015.354. PMID: 26633716; PMCID: PMC4720889.
ATRX	Nicolai S, Pieraccioli M, Peschiaroli A, Melino G, Raschellà G. Neuroblastoma: oncogenic mechanisms and therapeutic exploitation of necroptosis. Cell Death Dis. 2015 Dec 3;6(12):e2010. doi: 10.1038/cddis.2015.354. PMID: 26633716; PMCID: PMC4720889.
TERT	Nicolai S, Pieraccioli M, Peschiaroli A, Melino G, Raschellà G. Neuroblastoma: oncogenic mechanisms and therapeutic exploitation of necroptosis. Cell Death Dis. 2015 Dec 3;6(12):e2010. doi: 10.1038/cddis.2015.354. PMID: 26633716; PMCID: PMC4720889.
SLC39A7	Fauster A, Rebsamen M, Willmann KL, César-Razquin A, Girardi E, Bigenzahn JW, Schischlik F, Scorzoni S, Bruckner M, Konecka J, Hörmann K, Heinz LX, Boztug K, Superti-Furga G. Systematic genetic mapping of necroptosis identifies SLC39A7 as modulator of death receptor trafficking. Cell Death Differ. 2019 Jun;26(6):1138-1155. doi: 10.1038/s41418-018-0192-6. Epub 2018 Sep 20. PMID: 30237509; PMCID: P…
SPATA2	Kupka S, De Miguel D, Draber P, Martino L, Surinova S, Rittinger K, Walczak H. SPATA2-Mediated Binding of CYLD to HOIP Enables CYLD Recruitment to Signaling Complexes. Cell Rep. 2016 Aug 30;16(9):2271-80. doi: 10.1016/j.celrep.2016.07.086. Epub 2016 Aug 18. PMID: 27545878; PMCID: PMC5009064.
RNF31	Kupka S, De Miguel D, Draber P, Martino L, Surinova S, Rittinger K, Walczak H. SPATA2-Mediated Binding of CYLD to HOIP Enables CYLD Recruitment to Signaling Complexes. Cell Rep. 2016 Aug 30;16(9):2271-80. doi: 10.1016/j.celrep.2016.07.086. Epub 2016 Aug 18. PMID: 27545878; PMCID: PMC5009064.
IDH1	Yang Z, Jiang B, Wang Y, Ni H, Zhang J, Xia J, Shi M, Hung LM, Ruan J, Mak TW, Li Q, Han J. 2-HG Inhibits Necroptosis by Stimulating DNMT1-Dependent Hypermethylation of the RIP3 Promoter. Cell Rep. 2017 May 30;19(9):1846-1857. doi: 10.1016/j.celrep.2017.05.012. PMID: 28564603.
IDH2	Yang Z, Jiang B, Wang Y, Ni H, Zhang J, Xia J, Shi M, Hung LM, Ruan J, Mak TW, Li Q, Han J. 2-HG Inhibits Necroptosis by Stimulating DNMT1-Dependent Hypermethylation of the RIP3 Promoter. Cell Rep. 2017 May 30;19(9):1846-1857. doi: 10.1016/j.celrep.2017.05.012. PMID: 28564603.
KLF9	Tung B, Ma D, Wang S, Oyinlade O, Laterra J, Ying M, Lv SQ, Wei S, Xia S. Krüppel-like factor 9 and histone deacetylase inhibitors synergistically induce cell death in glioblastoma stem-like cells. BMC Cancer. 2018 Oct 22;18(1):1025. doi: 10.1186/s12885-018-4874-8. PMID: 30348136; PMCID: PMC6198521.
HDAC9	Tung B, Ma D, Wang S, Oyinlade O, Laterra J, Ying M, Lv SQ, Wei S, Xia S. Krüppel-like factor 9 and histone deacetylase inhibitors synergistically induce cell death in glioblastoma stem-like cells. BMC Cancer. 2018 Oct 22;18(1):1025. doi: 10.1186/s12885-018-4874-8. PMID: 30348136; PMCID: PMC6198521.
HSP90AA1	Yan C, Oh JS, Yoo SH, Lee JS, Yoon YG, Oh YJ, Jang MS, Lee SY, Yang J, Lee SH, Kim HY, Yoo YH. The targeted inhibition of mitochondrial Hsp90 overcomes the apoptosis resistance conferred by Bcl-2 in Hep3B cells via necroptosis. Toxicol Appl Pharmacol. 2013 Jan 1;266(1):9-18. doi: 10.1016/j.taap.2012.11.001. Epub 2012 Nov 9. PMID: 23147571.
LEF1	Liu P, Xu B, Shen W, Zhu H, Wu W, Fu Y, Chen H, Dong H, Zhu Y, Miao K, Xu W, Li J. Dysregulation of TNFα-induced necroptotic signaling in chronic lymphocytic leukemia: suppression of CYLD gene by LEF1. Leukemia. 2012 Jun;26(6):1293-300. doi: 10.1038/leu.2011.357. Epub 2011 Dec 13. PMID: 22157808.
BNIP3	Kim JY, Kim YJ, Lee S, Park JH. BNip3 is a mediator of TNF-induced necrotic cell death. Apoptosis. 2011 Feb;16(2):114-26. doi: 10.1007/s10495-010-0550-4. PMID: 20963496.
CD40	Qiu X, Klausen C, Cheng JC, Leung PC. CD40 ligand induces RIP1-dependent, necroptosis-like cell death in low-grade serous but not serous borderline ovarian tumor cells. Cell Death Dis. 2015 Aug 27;6(8):e1864. doi: 10.1038/cddis.2015.229. PMID: 26313915; PMCID: PMC4558516.
BCL2L11	Locatelli SL, Cleris L, Stirparo GG, Tartari S, Saba E, Pierdominici M, Malorni W, Carbone A, Anichini A, Carlo-Stella C. BIM upregulation and ROS-dependent necroptosis mediate the antitumor effects of the HDACi Givinostat and Sorafenib in Hodgkin lymphoma cell line xenografts. Leukemia. 2014 Sep;28(9):1861-71. doi: 10.1038/leu.2014.81. Epub 2014 Feb 24. PMID: 24561519.
EGFR	Zhao Q, Kretschmer N, Bauer R, Efferth T. Shikonin and its derivatives inhibit the epidermal growth factor receptor signaling and synergistically kill glioblastoma cells in combination with erlotinib. Int J Cancer. 2015 Sep 15;137(6):1446-56. doi: 10.1002/ijc.29483. Epub 2015 Mar 6. PMID: 25688715.
DDX58	Dunker W, Ye X, Zhao Y, Liu L, Richardson A, Karijolich J. TDP-43 prevents endogenous RNAs from triggering a lethal RIG-I-dependent interferon response. Cell Rep. 2021 Apr 13;35(2):108976. doi: 10.1016/j.celrep.2021.108976. PMID: 33852834; PMCID: PMC8109599.
TARDBP	Dunker W, Ye X, Zhao Y, Liu L, Richardson A, Karijolich J. TDP-43 prevents endogenous RNAs from triggering a lethal RIG-I-dependent interferon response. Cell Rep. 2021 Apr 13;35(2):108976. doi: 10.1016/j.celrep.2021.108976. PMID: 33852834; PMCID: PMC8109599.
APP	Wang L, Shen Q, Liao H, Fu H, Wang Q, Yu J, Zhang W, Chen C, Dong Y, Yang X, Guo Q, Zhang J, Zhang J, Zhang W, Lin H, Duan Y. Multi-Arm PEG/Peptidomimetic Conjugate Inhibitors of DR6/APP Interaction Block Hematogenous Tumor Cell Extravasation. Adv Sci (Weinh). 2021 Jun;8(11):e2003558. doi: 10.1002/advs.202003558. Epub 2021 Mar 18. PMID: 34105277; PMCID: PMC8188212.
TNFRSF21	Wang L, Shen Q, Liao H, Fu H, Wang Q, Yu J, Zhang W, Chen C, Dong Y, Yang X, Guo Q, Zhang J, Zhang J, Zhang W, Lin H, Duan Y. Multi-Arm PEG/Peptidomimetic Conjugate Inhibitors of DR6/APP Interaction Block Hematogenous Tumor Cell Extravasation. Adv Sci (Weinh). 2021 Jun;8(11):e2003558. doi: 10.1002/advs.202003558. Epub 2021 Mar 18. PMID: 34105277; PMCID: PMC8188212.

## Sheet: Supplementary Table 2
Supplementary Table 2. The copy number variation (CNV) of 67 necroptosis-related genes explored in AML.
Gene Symbol	TCGA.AB.2803.03A	TCGA.AB.2804.03A	TCGA.AB.2805.03A	TCGA.AB.2806.03A	TCGA.AB.2807.03A	TCGA.AB.2808.03A	TCGA.AB.2809.03A	TCGA.AB.2810.03A	TCGA.AB.2811.03A	TCGA.AB.2812.03A	TCGA.AB.2813.03A	TCGA.AB.2814.03A	TCGA.AB.2815.03A	TCGA.AB.2816.03A	TCGA.AB.2817.03A	TCGA.AB.2818.03A	TCGA.AB.2819.03A	TCGA.AB.2820.03A	TCGA.AB.2821.03A	TCGA.AB.2822.03A	TCGA.AB.2823.03A	TCGA.AB.2824.03A	TCGA.AB.2825.03A	TCGA.AB.2826.03A	TCGA.AB.2827.03A	TCGA.AB.2828.03A	TCGA.AB.2829.03A	TCGA.AB.2830.03A	TCGA.AB.2831.03A	TCGA.AB.2832.03A	TCGA.AB.2834.03A	TCGA.AB.2835.03A	TCGA.AB.2836.03A	TCGA.AB.2837.03A	TCGA.AB.2838.03A	TCGA.AB.2839.03A	TCGA.AB.2840.03A	TCGA.AB.2841.03A	TCGA.AB.2842.03A	TCGA.AB.2844.03A	TCGA.AB.2845.03A	TCGA.AB.2846.03A	TCGA.AB.2848.03A	TCGA.AB.2849.03A	TCGA.AB.2850.03A	TCGA.AB.2851.03A	TCGA.AB.2853.03A	TCGA.AB.2854.03A	TCGA.AB.2855.03A
TARDBP	0	0	0	0	0	0	0	0	0	0	0	0	0	0	0	0	0	0	0	0	0	0	0	0	0	0	0	0	0	0	0	0	0	0	0	0	0	0	0	0	0	0	0	0	0	0	0	0	0
TNFRSF1B	0	0	0	0	0	0	0	0	0	0	0	0	0	0	0	0	0	0	0	0	0	0	0	0	0	0	0	0	0	0	0	0	0	0	0	0	0	0	0	0	0	0	0	0	0	0	0	0	0
FASLG	0	0	0	0	0	0	0	0	0	0	0	0	0	0	0	0	0	0	0	0	0	0	0	0	0	0	0	0	0	0	0	0	0	0	0	0	0	0	0	0	0	0	0	0	0	0	0	0	0
TRIM11	0	0	0	0	0	0	0	0	0	0	0	0	0	0	0	0	0	0	0	0	0	0	0	0	0	0	0	0	0	0	0	0	0	0	0	0	0	0	0	0	0	0	0	0	0	0	0	0	0
MYCN	0	0	0	0	0	0	0	0	0	0	0	0	0	0	0	0	0	0	0	0	0	0	0	0	0	0	0	0	0	0	0	0	0	0	0	0	0	0	0	0	0	0	0	0	0	0	0	0	0
ALK	0	0	0	0	0	0	0	0	0	0	0	0	0	0	0	0	0	0	0	0	0	0	0	0	0	0	0	0	0	0	0	0	0	0	0	0	0	0	0	0	0	0	0	0	0	0	0	0	0
BCL2L11	0	0	0	0	0	0	0	0	0	0	0	0	0	0	0	0	0	0	0	0	0	0	0	0	0	0	0	0	0	0	0	0	0	0	0	0	0	0	0	0	0	0	0	0	0	0	0	0	0
HAT1	0	0	0	0	0	0	0	0	0	0	0	0	0	0	0	0	0	0	0	0	0	0	0	0	0	0	0	0	0	0	0	0	0	0	0	0	0	0	0	0	0	0	0	0	0	0	0	0	0
CFLAR	0	0	0	0	0	0	0	0	0	0	0	0	0	0	0	0	0	-1	0	0	0	0	0	0	0	0	0	0	0	0	0	0	0	0	0	0	0	0	0	0	0	0	0	0	0	0	0	0	0
CASP8	0	0	0	0	0	0	0	0	0	0	0	0	0	0	0	0	0	-1	0	0	0	0	0	0	0	0	0	0	0	0	0	0	0	0	0	0	0	0	0	0	0	0	0	0	0	0	0	0	0
IDH1	0	0	0	0	0	0	0	0	0	0	0	0	0	0	0	0	0	0	0	0	0	0	0	0	0	0	0	0	0	0	0	0	0	0	0	0	0	0	0	0	0	0	0	0	0	0	0	0	0
TNFSF10	0	0	0	0	0	0	0	0	0	0	0	0	0	0	0	0	0	0	0	0	0	0	0	0	0	0	0	0	0	0	0	0	0	0	0	0	0	0	0	0	0	0	0	0	0	0	0	0	0
LEF1	0	0	0	0	0	0	0	0	0	0	0	0	0	0	0	0	0	0	0	0	0	0	0	0	0	0	0	0	0	0	0	0	0	0	0	0	0	0	0	0	0	0	0	0	0	0	0	0	0
TLR3	0	0	0	0	0	0	0	0	0	0	0	0	0	0	0	0	0	0	0	0	0	0	0	0	0	0	0	0	0	0	0	0	0	0	0	0	0	0	0	0	0	0	0	0	0	0	0	0	0
TERT	0	0	0	0	0	0	0	0	0	0	0	0	0	0	0	0	0	0	0	0	0	0	0	0	0	0	0	0	0	0	0	0	0	0	0	0	0	0	0	0	0	0	0	0	0	0	0	0	0
OTULIN	0	0	0	0	0	0	0	0	0	0	0	0	0	0	0	0	0	0	0	0	0	0	0	0	0	0	0	0	0	0	0	0	0	0	0	0	0	0	0	0	0	0	0	0	0	0	0	0	0
HSPA4	0	0	0	0	0	0	0	0	0	0	0	0	0	0	0	0	0	0	0	0	0	0	0	0	0	0	0	0	0	0	0	0	0	0	0	0	0	0	0	0	0	0	0	-1	0	0	0	0	0
SQSTM1	0	0	0	0	0	0	0	0	0	0	0	0	0	0	0	0	0	0	0	0	0	0	0	0	0	0	0	0	0	0	0	0	0	0	0	0	0	0	0	0	0	0	0	0	0	0	0	0	0
RIPK1	0	0	0	0	0	0	0	0	0	0	0	0	0	0	0	0	0	0	0	0	0	0	0	0	0	0	0	0	0	0	0	0	0	0	0	0	0	0	0	0	0	0	0	0	0	0	0	0	0
TNF	0	0	0	0	0	0	0	0	0	0	0	0	0	0	0	0	0	0	0	0	0	0	0	0	0	0	0	0	0	0	0	0	0	0	0	0	0	0	0	0	0	0	0	0	0	0	0	0	0
SLC39A7	0	0	0	0	0	0	0	0	0	0	0	0	0	0	0	0	0	0	0	0	0	0	0	0	0	0	0	0	0	0	0	0	0	0	0	0	0	0	0	0	0	0	0	0	0	0	0	0	0
TNFRSF21	0	0	0	0	0	0	0	0	0	0	0	0	0	0	0	0	0	0	0	0	0	0	0	0	0	0	0	0	0	0	0	0	0	0	0	0	0	0	0	0	0	0	0	0	0	0	0	0	0
BACH2	0	0	0	0	0	0	0	0	0	0	0	0	0	0	0	0	0	0	0	0	0	0	0	0	0	0	0	0	0	0	0	0	0	0	0	0	0	0	0	0	0	0	0	0	0	0	0	0	0
MAP3K7	0	0	0	0	0	0	0	0	0	0	0	0	0	0	0	0	0	0	0	0	0	0	0	0	0	0	0	0	0	0	0	0	0	0	0	0	0	0	0	0	0	0	0	0	0	0	0	0	0
HDAC9	0	0	0	-1	0	0	0	0	0	0	0	0	0	0	0	0	0	0	0	0	0	0	0	0	0	0	0	0	0	0	0	0	0	0	0	0	0	0	0	0	0	0	0	0	0	0	0	0	0
EGFR	0	0	0	0	0	0	0	0	0	0	0	0	0	0	0	0	0	0	0	0	0	0	0	0	0	0	0	0	0	0	0	0	0	0	0	0	0	0	0	0	0	0	0	0	0	0	0	0	0
BRAF	0	0	-1	0	0	0	0	0	0	0	0	0	0	0	0	0	0	0	0	0	0	0	0	0	0	0	0	0	0	0	0	0	0	0	0	0	0	0	0	0	0	0	0	0	0	0	0	0	0
ATRX	0	0	0	0	0	0	0	0	0	0	0	0	0	0	0	0	0	0	0	0	0	0	0	0	0	0	0	0	0	0	0	0	0	0	0	0	0	0	0	0	0	0	0	0	0	0	0	0	0
MYC	0	0	0	0	0	0	0	0	0	0	0	0	0	0	0	0	0	0	0	0	1	0	0	0	0	0	0	0	0	0	0	0	0	0	0	0	0	0	0	0	0	0	0	0	0	0	0	0	0
CDKN2A	0	0	0	0	0	0	0	0	0	0	0	0	0	0	0	0	0	0	0	0	0	0	0	0	0	0	0	0	0	0	0	0	0	0	0	0	0	0	0	0	0	0	0	0	0	0	0	0	0
DDX58	0	0	0	0	0	0	0	0	0	0	0	0	0	0	0	0	0	0	0	0	0	0	0	0	0	0	0	0	0	0	0	0	0	0	0	0	0	0	0	0	0	0	0	0	0	0	0	0	0
KLF9	0	0	0	0	0	0	0	0	0	0	0	0	0	0	0	0	0	0	0	0	0	0	0	0	0	0	0	0	0	0	0	0	0	0	0	0	0	0	0	0	0	0	0	0	0	0	0	0	0
TSC1	0	0	0	0	0	0	0	0	0	0	0	0	0	0	0	0	0	0	0	0	0	0	0	0	0	0	0	0	0	0	0	0	0	0	0	0	0	0	0	0	0	0	0	0	0	0	0	0	0
TRAF2	0	0	0	0	0	0	0	0	0	0	0	0	0	0	0	0	0	0	0	0	0	0	0	0	0	0	0	0	0	0	0	0	0	0	0	0	0	0	0	0	0	0	0	0	0	0	0	0	0
SIRT3	0	0	0	0	0	0	0	1	0	0	0	0	0	0	0	0	0	0	0	0	0	0	0	0	0	0	0	0	0	0	0	0	0	0	0	0	0	0	0	0	0	0	0	0	0	0	0	0	0
FADD	0	0	0	0	0	0	0	0	0	0	0	0	0	0	0	0	0	0	0	0	0	0	0	0	0	0	0	0	0	0	0	0	0	0	0	0	0	0	0	0	0	0	0	0	0	0	0	0	0
PANX1	0	0	1	0	0	0	0	0	0	0	0	0	0	0	0	0	0	0	0	0	0	0	0	0	0	0	0	0	0	0	0	0	0	0	0	0	0	0	0	0	0	0	0	0	0	0	0	0	0
GATA3	0	0	0	0	0	0	0	0	0	0	0	0	0	0	0	0	0	0	0	0	0	0	0	0	0	0	0	0	0	0	0	0	0	0	0	0	0	0	0	0	0	0	0	0	0	0	0	0	0
MAPK8	0	0	0	0	0	0	0	0	0	0	0	0	0	0	0	0	0	0	0	0	0	0	0	0	0	0	0	0	0	0	0	0	0	0	0	0	0	0	0	0	0	0	0	0	0	0	0	0	0
IPMK	0	0	0	0	0	0	0	0	0	0	0	0	0	0	0	0	0	0	0	0	0	0	0	0	0	0	0	0	0	0	0	0	0	0	0	0	0	0	0	0	0	0	0	0	0	0	0	0	0
SIRT1	0	0	0	0	0	0	0	0	0	0	0	0	0	0	0	0	0	0	0	0	0	0	0	0	0	0	0	0	0	0	0	0	0	0	0	0	0	0	0	0	0	0	0	0	0	0	0	0	0
FAS	0	0	0	0	0	0	0	0	0	0	0	0	0	0	0	0	0	0	0	0	0	0	0	0	0	0	0	0	0	0	0	0	0	0	0	0	0	0	0	0	0	0	0	0	0	0	0	0	0
BNIP3	0	0	0	0	0	0	0	0	0	0	0	0	0	0	0	0	0	0	0	0	0	0	0	0	0	0	0	0	0	0	0	0	0	0	0	0	0	0	0	0	0	0	0	0	0	0	0	0	0
TNFRSF1A	0	0	0	0	0	0	0	0	0	0	0	0	0	0	0	0	0	0	0	0	0	0	0	0	0	0	0	0	0	0	0	0	0	0	0	0	0	0	0	0	0	0	0	0	0	0	0	0	0
DIABLO	0	0	0	0	0	0	0	0	0	0	0	0	0	0	0	0	0	0	0	0	0	0	0	0	0	0	0	0	0	0	0	0	0	0	0	0	0	0	0	0	0	0	0	0	0	0	0	0	0
FLT3	0	0	0	0	0	0	0	0	0	0	0	0	0	0	0	0	0	0	0	0	0	0	0	0	0	0	0	0	0	0	0	0	0	0	0	0	0	0	0	0	0	0	0	0	0	0	0	0	0
RNF31	0	0	0	0	0	0	0	0	0	0	0	0	0	0	0	0	0	0	0	0	0	0	0	0	0	0	0	0	0	0	0	0	0	0	0	0	0	0	0	0	0	0	0	0	0	0	0	0	0
RIPK3	0	0	0	0	0	0	0	0	0	0	0	0	0	0	0	0	0	0	0	0	0	0	0	0	0	0	0	0	0	0	0	0	0	0	0	0	0	0	0	0	0	0	0	0	0	0	0	0	0
ITPK1	0	0	0	0	0	0	0	0	0	0	0	0	0	0	0	0	0	0	0	0	0	0	0	0	0	0	0	0	0	0	0	0	0	0	0	0	0	0	0	0	0	0	0	0	0	0	0	0	0
HSP90AA1	0	0	0	0	0	0	0	0	0	0	0	0	0	0	0	0	0	0	0	0	0	0	0	0	0	0	0	0	0	0	0	0	0	0	0	0	0	0	0	0	0	0	0	0	0	0	0	0	0
IDH2	0	0	0	0	0	0	0	0	0	0	0	0	0	0	0	0	0	0	0	0	0	0	0	0	0	0	0	0	0	0	0	0	0	0	0	0	0	0	0	0	0	0	0	0	0	0	0	0	0
MPG	0	0	0	0	0	0	0	0	0	0	0	0	0	0	0	0	0	0	0	0	0	0	0	0	0	0	0	0	0	0	0	0	0	0	0	0	0	0	0	0	0	0	0	0	0	0	0	0	0
STUB1	0	0	0	0	0	0	0	0	0	0	0	0	0	0	0	0	0	0	0	0	0	0	0	0	0	0	0	0	0	0	0	0	0	0	0	0	0	0	0	0	0	0	0	0	0	0	0	0	0
PLK1	0	0	0	0	0	0	0	0	0	0	0	0	0	0	0	0	0	0	0	0	0	0	0	0	0	0	0	0	0	0	0	0	0	0	0	0	0	0	0	0	0	0	0	0	0	0	0	0	0
CYLD	0	0	0	0	0	0	0	0	0	0	0	0	0	0	0	0	0	0	0	0	0	0	0	0	0	0	1	0	0	0	0	0	0	0	0	0	0	0	0	0	0	0	0	0	0	0	0	0	0
MLKL	0	0	0	0	0	0	0	0	0	0	0	0	0	0	0	0	0	0	0	0	0	0	0	0	0	0	-1	0	0	0	0	0	0	0	-1	0	0	0	0	0	0	0	0	0	0	0	0	0	0
USP22	0	0	0	0	0	0	0	0	0	0	0	0	0	0	0	0	0	0	0	0	0	0	0	0	0	0	0	0	0	0	0	0	0	0	0	0	0	0	0	0	0	0	0	0	0	0	0	0	0
STAT3	0	0	0	0	0	0	0	0	0	0	0	0	0	0	0	0	0	0	0	0	0	0	0	0	0	0	0	0	0	0	0	0	0	0	0	0	0	0	0	0	0	0	0	0	0	0	0	0	0
BCL2	0	0	0	0	0	0	0	0	0	0	0	0	0	0	0	0	0	0	0	0	0	0	0	0	0	0	0	0	0	0	0	0	0	0	0	0	0	0	0	0	0	0	0	0	0	0	0	0	0
ID1	0	0	0	0	0	0	0	0	0	0	0	0	0	0	0	0	0	0	0	0	0	0	0	0	0	0	1	0	0	0	0	0	0	0	0	0	0	0	0	0	0	0	0	0	0	0	0	0	0
CD40	0	0	0	0	0	0	0	0	0	0	0	0	0	0	0	0	0	0	0	0	0	0	0	0	0	0	-1	0	0	0	0	0	0	0	0	0	0	0	0	0	0	0	0	0	0	0	0	0	0
SPATA2	0	0	0	0	0	0	0	0	0	0	0	0	0	0	0	0	0	0	0	0	0	0	0	0	0	0	-1	0	0	0	0	0	0	0	0	0	0	0	0	0	0	0	0	0	0	0	0	0	0
ZBP1	0	0	0	0	0	0	0	0	0	0	0	0	0	0	0	0	0	0	0	0	0	0	0	0	0	0	0	0	0	0	0	0	0	0	0	0	0	0	0	0	0	0	0	0	0	0	0	0	0
DNMT1	0	0	0	0	0	0	0	0	0	0	0	0	0	0	0	0	0	0	0	0	0	0	0	0	0	0	0	0	0	0	0	0	0	0	0	0	0	0	0	0	0	0	0	0	0	0	0	0	0
SIRT2	0	0	0	0	0	0	0	0	0	0	0	0	0	0	0	0	0	0	0	0	0	0	0	0	0	0	0	0	0	0	0	0	0	0	0	0	0	0	0	0	0	0	0	0	0	0	0	0	0
AXL	0	0	0	0	0	0	0	0	0	0	0	0	0	0	0	0	0	0	0	0	0	0	0	0	0	0	0	0	0	0	0	0	0	0	0	0	0	0	0	0	0	0	0	0	0	0	0	0	0
APP	0	0	0	0	0	0	0	0	0	0	0	0	0	0	0	0	0	0	0	0	0	0	0	0	0	0	0	0	0	0	0	0	0	0	0	0	0	0	0	0	0	0	0	0	0	0	0	0	0
[truncated: 145 more columns]

## Sheet: Supplementary Table 5
Supplementary Table 5. Clinical information for 151 patients with AML.
SAMPLE_ID	OS_MONTHS	OS_STATUS	DFS_MONTHS	DFS_STATUS	CYTOGENETIC_CODE_OTHER	SIRT1	SIRT2	IPMK	FLT3	DDX58	AXL	HAT1	TRIM11	MYC	PLK1	MPG	TNFRSF1B	CASP8	RNF31	TSC1	PANX1	TLR3	DIABLO	EGFR	MYCN	SLC39A7	FAS	SQSTM1	BACH2	ATRX	HDAC9	ZBP1	MAPK8	BNIP3	RIPK1	ALK	BCL2L11	BRAF	HSPA4	TERT	MLKL	BCL2	ITPK1	CYLD	DNMT1	FADD	TNF	KLF9	IDH2
2805	18.5	1	11.6	1	Normal Karyotype	4.17785	3.25646	3.62995	7.53985	4.17271	0.298208	3.55051	2.19816	5.51552	2.09985	3.48999	7.22754	4.15682	3.29032	3.4611	3.77903	0.0783443	1.7257	0.0127947	0.390237	3.42217	3.56843	4.10409	1.06239	4.31807	3.08535	0.796567	3.2047	1.84895	4.14127	0.307247	1.93443	3.12147	4.50311	0.466173	4.14683	2.34862	3.83216	4.10464	4.49192	2.5079	0.370474	2.95712	5.13869
2806	30.6	1	16.1	1	RUNX1-RUNX1T1	3.62058	2.52556	3.20114	8.19112	3.14606	0.37157	3.31681	2.26153	7.48594	2.6177	2.3044	2.43709	4.34103	3.20328	3.42187	3.29883	0.0487214	1.72094	0.0113806	2.25916	3.38209	2.81836	2.98916	0.53447	4.41199	2.29756	0.50848	3.44598	2.4992	3.94132	0.0159339	1.23441	3.59815	4.84958	0.462608	3.40208	3.90987	2.58894	3.06407	4.20589	1.91604	0.985442	0.798139	5.73159
2808	118.1	0	10	1	Intermediate Risk Cytogenetic Abnormality	3.7046	2.62751	3.37826	5.14816	3.19311	0.498425	3.62676	2.02994	5.76145	2.97021	2.83721	4.27763	4.45944	2.87513	3.2289	2.12721	0.106776	1.74963	0.0563795	2.669	3.45053	3.71179	3.17231	0.530069	4.60544	2.31555	0.579851	3.20873	2.55509	3.96743	0.0188472	2.39447	3.31913	5.00226	0.466527	3.48968	3.14742	2.93077	3.56517	4.46198	1.81769	1.03667	0.789145	5.7898
2810	1.3	1	1.3	0	N.D.	3.24124	3.75963	1.69294	6.53768	2.32494	0.247486	3.23951	3.54746	4.148	2.69848	4.46457	3.94303	3.76524	3.21956	2.6662	2.04176	0.147413	2.22318	0.005358	4.86373	3.97858	1.77912	4.49494	1.78007	3.654	0.297808	0.549876	2.65508	2.4482	3.57385	0.187942	0.535135	2.67251	3.66047	0.101827	2.31428	2.9355	3.54054	3.02641	4.75689	1.94683	1.06585	0.596971	6.53748
2811	8.2	1	8.2	1	Normal Karyotype	2.20768	3.60778	0.979885	5.83483	1.61636	0.0586018	2.25324	4.3271	3.40141	2.54991	4.52629	5.43916	4.76629	2.95035	2.42557	1.68871	0.183673	1.63209	0	3.58448	3.9006	2.92086	6.21924	0.349266	1.83558	1.00723	1.72872	2.38351	0.936359	3.52175	0.0359317	2.22525	2.52855	3.76329	0.290451	3.57655	1.42366	4.87261	3.49688	4.26605	2.23044	2.16993	2.86384	5.75853
2812	11.5	1	7.3	1	Normal Karyotype	3.95019	2.7619	2.8258	6.7464	3.2147	0.132732	3.76565	2.84936	5.40556	1.79183	3.28267	3.36367	4.18718	2.74041	3.12614	2.15184	0.180097	1.81758	0.00368102	2.20206	3.44839	3.03889	3.75838	0.278779	4.36953	0.635011	0.052078	3.56925	2.36173	3.82649	0.308984	2.42933	3.87314	4.83966	0.11913	2.26962	3.77889	2.73081	3.69714	4.49475	1.129	3.44076	1.97236	4.99495
2813	1.3	1	1.3	0	Complex Cytogenetics	3.29861	3.67221	3.11019	5.93196	3.55629	0.251249	3.43027	2.52726	4.81188	3.63563	3.3847	6.79537	4.02905	3.54537	3.01986	3.10381	0.190804	1.66719	0.0583343	0.508422	4.09271	3.83559	3.32109	0.611915	3.56524	2.30791	1.64241	2.49115	1.98577	3.70446	0.118656	3.51856	2.91904	3.5514	1.23764	3.83902	1.98179	4.31731	2.57002	4.71274	2.12863	1.42445	1.34081	5.57176
2814	26.3	1	22.2	1	Poor Risk Cytogenetic Abnormality	3.83961	2.85828	2.79546	7.58884	3.44839	0.651836	2.86428	2.35237	7.55726	1.24978	4.81175	3.10791	4.53215	3.23279	3.78772	2.4275	0.801045	1.90931	0.0106457	3.32571	3.25175	4.25997	2.87121	1.00745	4.32221	2.33312	0.292736	3.15954	2.94744	3.82981	0.458268	1.99786	3.30916	4.529	0.0873098	3.46026	3.7525	2.29592	3.75634	3.40732	2.00871	3.38812	1.61305	5.16077
2815	26.3	1	14.2	1	CBFB-MYH11	3.79406	2.83005	3.50009	6.14133	3.00718	1.53825	3.52004	2.25891	4.92005	4.02393	3.14856	6.56204	3.874	3.171	3.27028	3.27754	0.365756	1.75964	0.0376178	1.4032	3.71208	3.79511	3.48632	0.463668	4.01559	3.05309	0.337942	2.60454	1.94456	4.0041	0.0864337	2.82312	3.03453	4.56684	0.144155	4.37509	3.38615	3.51611	3.2476	4.90713	2.11511	2.81982	1.31858	5.91983
2817	9.3	1	9.3	0	BCR-ABL1	3.00037	3.42523	2.77408	5.79992	3.25645	1.2956	3.27025	2.42391	6.58777	3.23764	4.35091	6.01473	4.12382	3.65611	3.96236	3.0062	0.218632	1.40745	0.0577934	0.0444948	3.70553	2.48738	3.80583	3.2446	4.15832	1.83079	0.530888	2.96831	1.4763	3.97598	0.205194	1.57973	2.52854	4.32248	1.68519	3.52477	2.80232	3.67389	3.59634	4.72383	1.90485	2.40696	2.32198	5.61741
2818	10.2	1	6.9	1	Normal Karyotype	3.607	3.30999	3.32985	6.48681	3.69228	0.214232	3.22236	2.57942	5.16532	1.9635	3.86442	6.01578	4.54042	3.19429	3.58863	2.76045	0.202919	1.53537	0.0348978	3.02192	4.05451	4.17909	4.15178	1.10078	4.1372	1.71372	1.03629	2.93993	2.43113	4.3817	0.156329	2.852	3.58642	4.64513	0.0487579	4.38259	2.40417	3.64813	3.84038	3.97336	2.2915	2.33684	1.55171	4.65152
2819	95.6	0	95.6	0	RUNX1-RUNX1T1	3.59145	2.56174	2.62575	5.96324	3.39389	1.04512	4.18318	2.37033	6.59716	3.60188	2.86763	3.28618	3.81525	2.87339	2.80204	2.60755	0.663094	1.87104	0.0665779	0.535188	3.62472	2.727	3.01074	0.65736	4.26522	2.21603	0.438516	2.85748	1.5304	3.49808	0.0843491	1.10944	3.13276	5.35316	0.882764	3.3338	2.81716	2.69518	2.92368	4.69309	1.85388	1.20886	2.14217	6.34325
2820	0.3	1	0.3	0	Complex Cytogenetics	3.64076	4.04313	2.74104	8.3011	3.66528	0.372847	2.91035	3.14279	7.41469	1.8066	3.65226	4.94295	3.4984	3.95091	3.70323	3.85766	0.301817	1.61719	0	2.18245	3.15187	2.35652	3.40626	3.10151	3.78748	2.06719	0.869547	3.50502	2.72413	4.00887	0.437966	2.01013	3.18261	4.07314	1.23625	3.08754	3.63454	3.7782	3.40185	4.66656	2.48269	2.89819	2.7125	4.67314
2821	27.4	1	27.4	0	Intermediate Risk Cytogenetic Abnormality	3.40385	2.85523	2.81891	6.23667	3.31566	0.975148	3.18348	2.67301	6.33888	3.13202	3.83877	5.36165	4.24529	3.40797	3.29823	3.39634	0.953866	1.6242	0.417625	1.97449	3.93003	3.04754	4.16706	1.63003	4.14973	1.79411	1.14877	2.98146	2.8476	3.93464	0.305706	2.65213	3.44758	4.4161	0.164351	3.39117	3.66561	3.65635	3.73477	4.88956	1.78208	0.501214	3.19421	5.53298
2822	32.3	1	32.3	0	Intermediate Risk Cytogenetic Abnormality	3.66524	2.73787	3.03383	7.92602	3.75336	1.11604	3.15992	2.54162	6.06926	2.14804	3.74491	1.5353	4.08665	3.43455	3.37274	2.36718	0.566702	2.05123	0.0390776	3.94698	3.48104	2.89165	4.14635	0.631131	4.69942	2.39149	0.417041	3.4031	2.83604	4.11604	0.280577	1.10214	3.60677	4.72002	0.499276	3.1409	4.42001	3.33153	3.14639	4.28814	1.8762	0.207171	1.09611	5.71343
2823	0.2	1	0.2	0	PML-RARA	3.27188	3.46006	2.22732	6.84843	2.69346	2.37235	3.33707	2.11921	6.71523	2.3843	3.48251	2.91209	4.4881	3.39395	3.70303	2.99016	0.240428	1.55646	0.0030814	1.46883	4.62981	3.89882	3.60737	0.394333	3.60345	0.802732	0.299507	2.67918	2.96311	4.16652	0.00575605	0.761371	3.0937	4.77842	0.124399	4.3207	3.78533	3.00343	3.36989	4.14401	2.36165	4.56897	2.54091	5.59837
2825	7.5	1	6.4	1	Normal Karyotype	3.56812	3.94405	2.84002	7.32692	3.29356	0.110699	3.40255	2.69262	4.79464	1.97672	3.53088	6.75425	4.04458	3.70398	3.29469	3.09522	0.0576282	1.32092	0.00760539	0.729625	4.23411	4.05583	4.30745	1.00329	3.53955	2.11106	0.815967	2.60487	1.94144	4.22913	0.560094	3.45486	2.97523	4.61808	0.0730575	4.65279	1.75017	4.71615	3.40579	4.58081	2.46498	1.49515	4.63545	5.17754
2826	24.1	1	12.1	1	Normal Karyotype	3.66648	3.31627	3.3809	5.77436	3.10396	0.16335	3.77879	2.406	4.96503	2.54524	3.26817	6.46931	4.03999	2.878	3.01451	2.33345	0.183227	1.74606	0.0144072	1.9817	3.64377	3.63756	3.79694	0.946474	3.79708	1.76239	1.38209	2.80279	2.88767	3.88795	0.141706	2.43318	3.04981	4.54904	0	3.47783	2.77356	3.93923	3.73266	4.50533	2.28871	1.74322	0.876398	5.62066
2828	99.9	0	99.9	0	CBFB-MYH11	3.82319	3.12315	3.60555	5.67313	3.06213	0.413829	3.59202	2.20495	5.38364	3.61308	3.25783	6.87601	3.94797	3.22086	3.25837	3.12125	0.0588976	1.66229	0.0308553	0.994982	3.48664	3.68009	3.29544	0.312404	4.06401	3.0577	0.580476	2.76283	1.87401	3.75581	0.130023	3.14808	3.14794	4.85216	0.249555	4.32749	3.5537	3.97823	3.25743	4.60916	2.00361	1.28112	2.79818	5.40254
2830	8.1	1	8.1	0	Intermediate Risk Cytogenetic Abnormality	3.11475	3.36378	2.17298	7.51676	3.07264	0.23513	3.27854	2.59949	5.50128	4.34451	4.505	4.8505	3.92784	3.62052	3.38975	3.8442	0.676271	1.65879	0.0112396	1.06408	3.97302	2.77127	3.69739	1.71169	3.81864	2.53637	1.12535	2.5977	2.17425	3.7114	0.1406	2.64682	2.98859	4.2835	0.991476	3.08403	3.60951	3.59799	3.87539	4.93491	3.01191	1.04861	2.24927	5.96753
2834	7.7	1	7.7	0	MLL translocation, poor risk	3.76266	3.06152	3.20937	6.50072	3.36391	0.405458	3.79245	2.59561	5.01279	4.50229	3.27717	5.31191	3.78779	3.2375	3.22598	2.69916	0.325988	1.48283	0.0423349	1.10406	3.68855	3.28243	3.5821	0.77671	4.06474	2.66679	0.573339	2.7996	1.84584	3.97289	0.039615	2.20435	3.41937	4.80407	0.0687058	4.05718	4.11882	3.74874	3.548	5.14808	2.429	0.912865	1.68096	6.07705
2835	77.3	0	77.3	0	Normal Karyotype	2.71702	3.93716	2.52297	7.57041	2.25445	0.109663	3.75329	2.82577	3.4631	4.4633	4.49603	6.43393	3.48952	3.34351	2.77171	2.85651	0.0115979	1.57447	0.0357987	0.101654	4.28005	3.69317	4.26131	0.362459	3.20686	1.78104	0.742228	2.35937	2.0846	3.62744	0.0608234	1.95208	2.64554	3.9871	0.0500104	3.5482	1.49373	4.55628	3.43122	5.06175	2.13428	2.87395	3.30033	5.67271
2836	17	1	17	1	Normal Karyotype	3.47651	3.836	3.23589	6.36159	4.13427	0.11145	3.21144	2.68369	5.44168	2.91113	3.79516	7.82901	3.83422	3.80205	3.27607	2.42174	0.350108	1.57518	0.00353991	3.12663	3.6393	3.41779	4.1998	1.23285	3.40996	1.74913	1.05114	2.65705	2.37606	4.04267	0.485037	3.29905	2.95679	4.50153	0.142047	3.52566	2.75473	4.41328	3.45578	4.61646	2.1285	2.86561	1.66538	5.3387
2839	16.3	1	10.2	1	Normal Karyotype	3.57829	2.95519	2.71513	7.01964	3.17993	0.237366	3.57877	2.54853	6.0569	2.58255	4.14838	3.04905	4.37092	2.90627	3.61044	2.64957	0.198652	2.09946	0.00394071	4.03765	3.40699	2.48161	3.59665	0.248994	4.4973	1.75552	0.126742	3.3354	2.44157	3.8973	0.4085	2.01258	3.68575	4.82256	0.157304	2.86603	4.43049	3.02954	3.53766	4.1256	1.80873	3.36851	0.668248	5.32842
2840	0.7	1	0.7	0	PML-RARA	3.72136	3.09249	2.40264	7.34994	2.84976	1.99681	3.14065	2.43777	5.55273	3.11785	3.57028	2.13396	4.82482	3.38479	3.79477	1.85208	0.0245364	1.86713	0.0504592	1.326	4.15355	4.04357	3.30164	1.4419	3.49916	1.11451	0.287471	2.77425	3.0021	3.82625	0.0472259	2.95637	3.10249	4.13733	0.28279	3.90183	4.26317	2.91361	3.12568	4.94206	2.00256	2.50576	3.54724	5.78331
2841	46.5	1	5.4	1	PML-RARA	2.65593	3.43862	1.88233	5.3815	2.00359	0.0367251	2.58738	2.34321	5.99303	2.89916	4.19223	2.39767	3.80209	3.69422	3.53707	2.48724	0.0559248	1.28343	0.0117848	2.65559	4.30231	3.82141	4.09072	0.493001	2.56033	0.130621	0.864851	2.53668	2.50794	3.91305	0	2.34696	2.57022	3.5332	0.208459	4.36628	2.94853	3.42446	2.98403	4.07138	2.07204	3.42017	1.6795	5.59022
2842	0.3	1	0.3	0	Intermediate Risk Cytogenetic Abnormality	4.03964	2.87892	3.30818	6.44872	3.51846	0.380935	4.01894	2.02019	3.0411	3.43582	3.21455	5.26017	3.6669	2.77525	3.09075	3.44865	0.148079	1.4679	0.0398945	0.676778	3.61255	3.38579	3.66833	0.401584	3.97897	2.0723	0.418113	2.72934	2.52363	4.06863	0.0685748	2.07069	3.47386	4.82974	0.00809017	3.5717	2.78575	3.76777	3.67656	4.40687	2.15068	0.0655224	2.36829	5.18418
2843	6.3	1	3.7	1	Intermediate Risk Cytogenetic Abnormality	3.31827	3.5029	2.00949	6.80613	4.05409	1.11195	3.06028	2.73467	5.47177	4.28409	4.42027	5.86176	3.82589	4.07652	3.41663	2.67698	0.600431	1.5635	0.0166998	0.430784	4.00731	3.09232	3.71568	2.21865	3.97265	2.5888	2.46784	2.42555	1.69207	4.15465	0.231617	2.9078	2.96504	4.8015	1.99486	3.82358	2.84037	3.84205	3.50439	5.0417	2.29487	1.4226	1.65448	6.21262
2844	3.9	1	3.9	0	MLL translocation, poor risk	3.19561	2.95097	2.74942	6.79406	2.71086	0.219174	3.31576	2.46299	6.44473	3.49197	4.02772	4.69618	3.93091	3.41782	3.30121	2.26991	0.11615	1.73114	0.0680892	2.14742	3.72816	2.95757	3.80942	0.241742	3.79637	2.09742	0.399105	2.89151	2.70014	3.74321	0.0637509	1.90032	3.18605	4.48773	0.520272	3.68882	2.99911	3.68241	3.21195	4.90477	1.84229	0.74219	1.23611	5.81113
2845	9.3	1	8.5	1	Normal Karyotype	3.30056	2.92302	2.53571	5.97037	3.15334	0.885287	3.22389	2.44395	6.44698	3.28779	3.944	4.3095	4.124	3.46895	3.47197	2.67334	0.274524	1.75718	0.0243998	3.62306	4.17752	2.9997	3.53246	0.840494	3.99816	2.45374	0.657846	2.90472	2.55447	3.95778	0.0674139	1.23453	2.9071	4.47159	1.56442	2.75345	3.1647	3.21639	3.582	4.88277	2.00613	0.867417	0.576537	6.3241
2846	45.8	1	10.8	1	CBFB-MYH11	3.47247	2.9873	3.21247	6.66979	2.86191	1.49584	3.39436	2.38837	5.6597	3.16462	3.97506	6.23857	3.58968	3.31838	3.26108	2.93852	0.362211	1.7055	0.0467033	1.50483	3.78824	3.18885	3.56857	0.845455	3.76955	2.51489	0.514301	2.65866	2.17206	3.71646	0.0559553	2.22315	3.08257	4.4091	0.322799	3.57946	3.44876	3.59168	3.07842	4.87002	1.8404	3.04784	1.74859	5.62031
2847	52.7	1	19.3	1	Poor Risk Cytogenetic Abnormality	3.1814	3.07059	2.17296	6.30888	3.12859	0.357042	3.19222	2.49774	6.30455	3.66628	4.2536	5.36726	4.08834	3.57621	3.57802	2.48067	0.197289	1.85246	0.010246	3.18311	3.91052	2.45292	4.1245	1.6849	3.97044	0.775548	1.17206	2.54319	2.11611	4.12436	0.174814	2.20394	2.46955	4.43759	2.17488	3.22787	3.53474	3.61407	3.36875	4.70038	2.33561	1.3257	2.93589	6.05888
2849	95.5	0	95.5	0	Complex Cytogenetics	4.05541	2.84205	0.720863	4.43934	3.98934	1.42566	3.43479	2.4796	3.17055	2.15502	3.46461	2.37723	4.22406	2.91693	4.11541	3.43862	2.45129	1.86482	0.139298	5.17597	3.30637	3.69567	3.28148	0.689535	4.79923	1.16946	0.77445	4.06616	2.87279	3.90436	0.369147	2.16712	3.98772	3.77008	0.433291	2.98958	5.61156	2.441	3.66381	4.68092	1.68444	2.14309	0.914819	5.32378
2851	7.7	1	5.9	1	Normal Karyotype	3.47388	4.19684	2.96571	6.85465	3.17624	0.144089	2.94868	2.81639	5.09286	1.63255	4.25242	7.42658	4.01779	3.74415	3.11591	2.76468	0.173596	1.42852	0.00707165	3.15276	3.84889	3.30142	4.42166	1.40587	3.52171	2.15682	0.781368	2.56903	2.12338	4.0222	0.361553	3.24267	2.73686	4.27694	0.0680371	3.76835	2.32452	4.61699	3.33069	3.9452	2.25942	3.16669	2.0447	5.04645
2853	3.1	1	3.1	0	Normal Karyotype	3.66979	2.57488	3.19701	7.14151	3.27982	0.166324	3.86216	2.1506	6.25713	2.33952	3.27126	3.12582	4.60061	3.06532	3.41211	3.06816	0.402412	1.70592	0.00911501	3.28779	3.76847	3.61628	3.66537	0.511281	4.45146	1.68032	0.159011	3.50189	1.84974	4.00715	0.0668151	2.18564	3.47363	5.17155	0.0750379	3.52679	3.42854	3.03382	3.44024	4.1583	1.67866	0.899882	0.746129	5.18551
2856	5.3	1	5.3	0	Normal Karyotype	2.44991	3.57045	1.40543	6.19647	2.44432	0.103781	3.23879	2.64958	6.39056	3.8336	4.76206	6.30137	3.63781	3.68338	2.76683	2.13267	0.0620907	1.45388	0.0131063	2.19171	4.28317	3.14823	4.14044	0.722176	3.05599	1.9782	0.43311	2.08298	1.97169	3.59008	0.0484125	2.25017	2.27166	4.41023	0.685786	3.48717	2.7169	4.6901	2.97739	4.61897	2.61822	1.47612	1.86617	5.96081
2857	10	1	6.5	1	Complex Cytogenetics	3.59051	3.28523	2.41042	3.42444	3.14227	1.85231	3.75704	2.63938	6.71278	4.17687	3.04097	4.44816	4.13276	2.65555	3.95537	2.66624	0.603122	1.71663	0.180673	2.19805	3.96737	2.84064	3.68971	2.57618	4.16354	0.891979	1.78854	3.13379	2.47	3.92177	0.0949532	3.81413	2.7879	4.27455	0.437407	3.28281	3.84142	3.43151	3.64795	5.22797	2.17566	1.38584	3.05564	5.39203
2858	19.2	1	18.2	1	RUNX1-RUNX1T1	3.18471	2.96185	2.62048	7.5627	3.43657	0.839856	3.42907	2.32069	6.53984	2.58284	3.58156	1.90159	4.10938	3.53889	3.26162	2.38594	0.443057	1.81167	0.0280472	1.55152	3.78427	3.96747	3.63058	1.22188	3.87722	1.01347	0.755711	2.72865	1.82082	4.01184	0.156659	1.10517	2.96217	4.35223	0.587823	3.05072	2.32192	3.16378	3.17762	4.3092	1.98337	0.423931	2.13706	5.63555
2859	10.2	1	8	1	Normal Karyotype	3.43924	3.26167	2.64046	7.00911	3.76619	0.258775	3.13636	2.41843	5.46204	2.39731	4.33999	4.99247	4.3588	3.7404	3.49728	2.79111	0.996993	1.73636	0.0144703	3.68654	3.84437	2.55582	4.23983	2.09908	3.86739	1.62789	1.57636	2.85834	2.48611	4.34506	0.359204	2.25627	3.42186	4.50406	0.163878	3.41462	3.55529	3.53351	4.00865	4.15477	2.26208	2.20334	1.8278	5.10655
2861	0.6	1	0.6	0	Poor Risk Cytogenetic Abnormality	3.04386	3.14654	2.53454	7.46239	2.2422	0.115841	3.62757	3.0956	3.94203	4.36426	4.11635	4.77218	4.28895	3.31354	2.87927	2.39877	0.0281709	1.91955	0.0110265	0.0362964	4.39822	2.42439	3.64411	0.921596	2.8993	3.10263	0.722515	2.40211	2.21991	3.25152	0.00688209	2.17307	2.4576	4.68906	1.03955	2.54001	2.78719	3.89893	2.83149	4.78709	2.15604	1.16734	3.48174	5.63709
2862	69	0	69	0	Normal Karyotype	2.84909	3.28994	1.81359	6.56239	2.74806	0.7356	2.7008	2.53657	6.52198	3.1744	4.38938	2.20795	3.90317	3.62951	3.22525	1.41902	0.0411949	1.96291	0.00432939	3.16178	4.36982	3.40036	3.67485	1.12842	3.21811	0.30852	0.630146	2.6422	3.11417	3.85032	0.0399758	1.12939	2.61057	4.29835	0.889326	3.51382	3.519	3.11451	2.86725	4.47496	2.297	3.38673	1.80695	6.25028
2863	1.2	1	1.2	0	Poor Risk Cytogenetic Abnormality	3.68339	2.51812	3.20065	7.13386	3.39013	0.845787	3.74565	2.4092	7.43017	3.47201	3.23126	3.4277	4.09618	2.8903	3.02511	3.7807	1.44456	1.63586	0.0456264	2.23996	3.69537	3.89547	3.71477	0.353924	4.31416	0.386136	0.398866	3.21695	2.94089	3.71152	0.13241	3.12547	3.45426	4.79951	0.392604	3.16747	3.88189	3.14243	3.72707	4.91609	1.81495	0	4.40556	6.02395
2865	2.3	1	2.3	0	Intermediate Risk Cytogenetic Abnormality	3.17351	3.00444	2.48191	5.13628	4.35498	0.224643	3.35245	2.4696	6.25951	1.95579	4.75996	6.66185	3.58295	3.89125	3.29557	2.81006	0.344289	1.60586	0.00838088	2.84135	3.94228	3.28283	3.95489	0.720866	3.80251	1.48054	2.08685	2.60819	2.27972	4.09803	0.396054	1.81002	2.99707	4.77833	0.258585	3.93494	3.05396	3.98648	3.65103	4.79292	2.35097	1.28792	2.50689	6.00046
2866	5.5	1	4.5	1	Normal Karyotype	3.20407	3.77464	2.53434	6.47771	3.14345	0.159366	3.90998	3.0607	5.46576	2.83603	4.19815	7.20053	3.90239	3.72434	3.17432	3.20552	0.130271	1.66911	0	0.0366164	3.97858	3.17974	4.23939	0.712863	3.20481	2.22121	1.0628	2.4414	2.41495	3.83263	0.248719	2.79538	2.74126	4.06595	0.0207545	4.13974	2.28522	4.37408	3.55427	5.00116	2.55742	0.377744	2.5745	5.89095
2867	5.2	1	5.2	0	Normal Karyotype	3.47851	2.78886	3.03427	5.58887	3.11859	0.381168	3.55404	2.35326	4.75636	2.46944	3.64384	5.05784	4.06378	3.10844	2.74603	2.67943	0.119352	2.04128	0.00402886	4.01023	3.38937	2.84038	4.13149	2.29281	4.72974	1.81477	1.01385	2.76167	2.63855	3.73632	0.122855	1.82246	3.60696	4.46159	0.0664167	2.83691	4.51659	3.29997	4.31555	4.71926	1.4293	1.3545	2.75793	5.89582
2869	27.1	0	15.6	1	Normal Karyotype	3.3422	3.17185	2.43165	6.63805	3.47396	0.270762	3.17448	2.58365	7.26514	3.13282	3.96002	4.37562	4.14591	3.57021	3.59787	2.81149	0.935479	1.62866	0.00394248	4.46333	3.97708	3.18546	4.07606	1.44057	4.30755	0.310671	0.772889	3.02539	2.65148	4.02592	0.218752	2.78262	3.35459	4.69457	0.378132	2.83039	3.97359	3.57061	3.81997	4.76814	2.34055	1.4178	1.39193	5.89713
2870	4.5	1	4.5	0	CBFB-MYH11	3.22449	3.25268	2.46064	6.64594	3.23587	1.52041	3.47152	2.6993	6.42283	2.13352	4.20577	6.59121	4.13607	3.79337	3.44203	3.28245	0.490791	1.58323	0.00703592	3.07717	3.9248	3.56367	3.925	1.23467	3.68836	2.28089	0.89204	2.61733	2.20418	4.12527	0.161992	2.23331	2.78595	4.48001	0.326481	4.23482	3.93598	3.66468	3.149	5.25047	2.42523	3.6669	2.4236	6.20487
2871	22.6	0	13.9	1	Normal Karyotype	3.19611	3.04147	2.25676	6.72235	3.4796	0.324041	2.89938	2.55408	6.39047	2.35871	4.36943	4.57145	4.12266	3.62052	3.5412	2.87474	0.37609	1.7465	0.00823216	4.29899	3.84143	2.96113	4.06912	2.31914	4.13481	0.928712	1.92834	2.8326	2.48102	4.08413	0.389878	2.91757	3.51231	4.51824	0.535947	2.92101	3.73895	3.43842	3.91502	4.3842	2.02926	1.38694	2.10071	5.14281
2872	43.4	0	43.4	0	PML-RARA	3.44386	2.53296	2.14189	4.74983	2.72105	0.295738	2.67217	2.494	3.78444	3.47533	3.20838	3.16172	3.17821	3.32682	3.89303	1.28971	0.0508902	1.93814	0.149387	0.0377463	4.09887	2.70222	5.48868	1.2476	3.15529	0.254183	0.474285	2.86936	2.51538	4.65122	0.0142845	1.21468	3.60453	3.85448	0.0632665	2.44074	2.32841	2.83326	3.07747	4.40394	1.23193	2.52443	1.17605	5.14178
2873	32.7	0	32.7	1	Normal Karyotype	3.22715	3.838	2.84823	6.53994	2.91551	0.241866	3.19133	2.79774	3.48528	2.28747	3.52074	6.80616	3.98538	3.28089	3.13418	3.06015	0.150461	1.43317	0.0550322	0.0367831	4.13586	3.45258	4.14655	1.6151	3.36382	1.43675	1.12088	2.40751	2.15666	4.00071	0.625573	3.42003	2.81418	4.09603	0.40874	3.91544	2.01816	4.55105	3.2529	4.26492	1.76931	1.83425	4.3641	5.17826
2874	35.2	0	35.2	0	Poor Risk Cytogenetic Abnormality	3.35397	2.67771	2.63898	6.4383	2.94436	0.136176	3.27237	2.53534	6.83219	3.34105	3.94826	4.62179	3.82036	3.22549	3.4939	2.96423	0.845345	1.44156	0.0241352	0.879958	3.72184	3.12714	4.32515	0.186226	4.28215	0.677977	0.440782	2.74571	2.19022	4.04546	0.00756447	0.714038	2.65966	4.39828	0.250322	3.29983	2.95264	3.39213	3.43611	4.89836	1.74656	1.59557	1.21216	5.61643
2875	27.7	0	27.7	0	RUNX1-RUNX1T1	2.90714	2.96507	2.56294	6.42492	3.04998	0.341582	3.35264	2.37769	7.02807	2.97545	3.38542	4.05445	4.02947	3.72683	3.40278	3.04995	0.19612	1.71224	0	2.1974	3.87894	2.7967	3.66911	1.06863	3.91611	1.74854	0.917437	2.80327	1.84578	3.85308	0.0126799	1.08183	3.13647	4.59569	1.13299	3.20041	2.82283	3.36286	3.31839	4.73129	1.96045	0.524207	1.62901	6.12526
2876	59	0	59	0	Poor Risk Cytogenetic Abnormality	3.61389	2.34622	3.08611	5.23889	3.24148	0.267522	3.45829	2.25146	6.20226	2.36495	3.14015	2.70243	4.81868	2.61861	3.21015	2.22213	0.20935	1.92992	0.0555862	2.74916	2.94897	3.6077	3.93401	0.515221	4.41375	2.59941	0.291266	2.98849	2.81956	3.88612	0.0131845	0.751407	3.41033	4.40385	0.150944	3.26105	3.75575	2.80252	3.7431	4.34258	1.62017	0.578825	0.685928	5.83509
2877	41.4	0	41.4	0	Normal Karyotype	3.73094	3.43444	2.74209	7.36979	3.43878	0.266369	3.39746	3.09152	5.39682	2.44107	3.80386	2.23777	4.29758	3.48596	3.64794	2.38009	0.249429	2.15273	0.00414873	3.75582	4.36921	2.82221	4.10965	1.39641	4.19545	0.230226	0.427912	3.75087	3.37566	4.12976	0.0307429	1.93564	3.15267	4.4807	0.439131	2.43298	3.41101	3.32309	3.36634	4.70356	1.4981	0.486322	1.50916	5.9381
2878	12.2	1	12.2	0	Complex Cytogenetics	3.79907	2.71055	2.656	4.36325	3.16832	0.885806	3.80736	2.02368	6.97463	3.345	2.8615	4.00959	3.83921	2.14787	3.55673	2.80401	0.427121	1.48479	0.302231	2.82039	3.55472	2.59867	3.34931	1.30006	4.17682	0.792413	1.34225	3.33544	2.79397	3.61789	0.281853	3.08014	2.62926	3.94124	0.505183	1.9618	2.90841	2.48657	3.16126	4.54317	1.69158	2.44012	2.84562	5.4297
2880	20.5	1	9.8	1	Normal Karyotype	2.9111	3.18875	2.58746	5.58827	3.03767	0.130736	3.21009	2.45566	5.70976	2.32771	3.82378	5.4801	4.25792	3.5314	3.61219	2.02751	0.101253	1.88666	0.00775284	3.80501	3.66641	2.85024	3.77093	0.178907	4.10118	2.36525	0.158711	2.88907	2.27711	4.05226	0.0639672	1.40712	3.1166	4.65563	1.2212	3.53769	2.65703	3.82358	3.70024	4.95899	1.91428	1.12934	1.57715	6.26316
2881	29.7	0	8.8	1	CBFB-MYH11	3.13393	3.06413	3.0524	5.48694	3.29539	1.28984	3.52495	2.49301	6.0166	2.04366	3.95628	6.43864	4.16134	3.38509	3.19909	2.97856	0.658527	1.82651	0.0100338	3.51612	3.4971	3.91287	3.96633	1.48829	3.97178	1.44847	0.739354	2.51022	1.74211	3.94176	0.126106	2.5485	3.12258	4.38305	0.126245	3.76465	3.26586	3.31058	3.33444	4.65936	1.83648	2.68148	1.96191	5.64324
2882	11	1	11	0	Poor Risk Cytogenetic Abnormality	3.40794	3.25959	2.26592	3.18745	3.92623	1.4724	2.66988	2.57414	5.86499	2.98865	3.35631	5.5079	4.3586	4.10059	3.97521	2.66422	1.10705	1.7941	0.343419	5.11945	4.1645	3.25849	4.44955	1.28073	3.99083	0.520268	2.30763	2.74605	1.94754	4.46846	0.0690496	2.93515	2.59046	4.4474	0.515478	3.34127	4.62071	3.35728	4.08532	4.53354	1.86627	2.26362	2.1707	5.61813
2883	47.2	0	47.2	0	MLL translocation, poor risk	2.91656	4.01304	1.46086	6.17888	2.73956	0.639045	3.36188	2.26676	5.93436	2.71746	3.44678	4.08495	3.65081	3.08215	3.25806	1.7474	0.158985	1.19134	0.134056	0	3.6407	2.63593	3.44614	3.55389	3.65448	1.25319	0.819602	2.35414	2.44479	3.53409	0.330447	2.74834	2.80643	3.69979	0.602687	3.6035	3.46072	2.90307	2.66793	4.82928	1.58945	0.721734	1.88404	4.88882
2884	24.8	1	13.8	1	Normal Karyotype	3.40126	3.60984	2.47962	7.69555	2.94627	0.125498	2.92594	2.78919	5.16763	3.62945	4.02213	6.51255	4.2034	3.46896	3.41887	2.70121	0.140351	1.78189	0.00693526	2.04278	4.20917	3.49779	4.15026	2.31593	3.51723	2.27768	0.944418	2.76318	2.43993	3.98574	0.216828	3.17992	3.08492	4.55274	0.266581	3.5737	2.99471	4.41017	3.33907	4.4848	1.99472	1.29474	3.47894	5.2275
2885	7	1	4.8	1	Complex Cytogenetics	3.34608	3.6141	2.12027	7.163	3.31328	0.532902	3.3322	2.53218	6.02368	2.07257	4.36287	4.15223	4.368	3.55068	3.75537	3.98842	0.95638	1.82032	0.00433834	4.30062	3.83326	1.64983	3.48734	2.14741	4.19143	1.42694	0.790273	3.27004	2.07768	4.01663	0.286417	1.52115	2.67724	3.66205	1.5247	4.08912	3.05179	2.8556	3.54733	5.09694	2.38386	0.764428	3.10359	5.91142
2886	29.4	0	29.4	0	RUNX1-RUNX1T1	3.22241	3.0421	2.87042	6.83219	3.67972	0.346467	3.24406	2.37069	7.0908	2.95486	3.35967	2.49248	4.17142	3.86621	3.5684	3.17982	0.912274	1.61794	0.00675484	3.34038	3.76252	2.81148	3.84508	1.06624	3.992	1.16459	0.461532	3.03588	2.43927	4.08572	0.0919517	0.668361	3.29605	4.50319	0.887481	3.52348	2.75136	3.08465	3.53229	4.67448	2.26788	0.539692	0.833207	5.85935
2888	33.5	0	33.5	0	CBFB-MYH11	3.31351	3.36459	3.49074	5.15338	3.33395	0.303191	3.31628	2.34536	3.78848	2.04695	3.06204	7.47005	4.21418	3.37033	3.48203	2.69371	0.204121	1.60711	0.0145105	0.0846404	3.42183	4.29704	3.74894	1.46286	3.74171	3.14797	1.20422	2.55899	2.15877	3.80476	0.100065	3.62511	2.84547	4.22388	0.117895	4.21648	3.0027	3.81563	4.00557	4.06309	1.38315	1.46	2.40294	4.58554
2889	34.3	0	28.4	1	CBFB-MYH11	3.15582	2.85058	2.61325	6.3571	3.18089	1.82312	3.18429	2.45729	6.33697	2.45989	4.24082	6.3561	3.60692	3.54171	3.06919	3.06408	0.657513	1.46586	0.00339857	3.03383	3.92539	3.21159	3.86185	0.343279	3.907	2.32774	0.475328	2.47311	2.11644	3.90149	0.0438599	2.58271	2.87529	4.51132	0.253439	3.92594	3.62969	3.25195	2.92201	4.71156	2.3925	1.24362	1.48626	6.04685
2890	0.5	1	0.5	0	Intermediate Risk Cytogenetic Abnormality	3.21824	3.80618	2.68942	6.52402	3.86937	0.101044	3.07909	2.64643	4.30392	2.11721	4.35562	6.20783	4.20427	3.7768	4.66259	2.70852	0.222592	1.66651	0.00830026	3.44451	3.61321	2.82854	3.70511	2.49534	4.3698	1.09908	1.89214	3.49804	2.09975	4.20795	0.229724	2.54345	3.21774	4.14639	0.594863	3.52901	2.52147	3.71635	4.18843	4.38689	1.49976	1.34449	2.71131	5.56401
2891	21.5	1	14.9	1	Complex Cytogenetics	3.3191	3.40049	2.2458	7.70247	2.84175	0.25611	3.28884	2.70476	5.36877	4.29606	3.78975	4.53772	3.61597	3.51184	3.29216	3.48395	0.0076516	1.60853	0.0431299	0.631971	4.28915	2.3315	3.54704	1.19983	3.76446	2.89545	1.40089	2.89513	2.00089	4.17967	0.0654674	2.11248	3.09142	4.78274	1.75952	3.64048	3.32912	3.88194	3.50405	5.47794	2.15614	2.69666	2.09596	6.49873
2892	59.3	0	9.8	1	CBFB-MYH11	3.89982	2.83975	3.07209	5.17258	3.00952	1.74955	3.35504	2.27244	5.94179	3.69919	3.73805	6.02242	3.75139	2.95889	3.05094	2.68645	0.383383	1.67174	0.0191793	2.04723	3.70298	3.12943	3.95664	0.745957	3.85068	2.78753	0.214694	2.3515	1.73072	3.68346	0.263249	2.09672	3.18606	4.49165	0.302145	3.91386	3.44121	3.36644	2.86763	4.69088	2.23061	3.12785	1.31898	6.00629
2893	6.6	1	6.6	0	MLL translocation, poor risk	3.52662	3.90783	2.24418	6.98649	2.5034	0.223725	3.86596	2.32252	3.26943	4.30865	4.02705	5.7585	3.51764	3.00552	2.42199	2.66326	0.0773862	1.57271	0	0.307234	4.29773	3.95863	3.85667	0.889997	3.26248	2.42615	0.725549	2.30312	1.9784	3.65207	0.0204185	1.74988	2.43807	4.55446	0.201429	3.9098	2.26289	4.22149	2.92739	5.03684	2.45102	2.13417	2.85952	5.73606
2894	5.6	1	5.6	0	MLL translocation, t(9;11)	3.7432	2.85374	2.645	7.14675	3.27117	1.19407	3.58244	2.38209	5.08572	2.90666	3.07956	4.71281	4.17112	2.80378	3.64697	2.78857	0.129334	1.99733	0.00368981	0.0363445	3.62525	2.10532	4.01631	0.869932	3.88572	2.64358	0.634757	3.23694	2.37977	3.66101	0.0740523	1.75187	2.31366	4.44109	0.914128	3.24378	3.86417	4.19784	3.29109	4.5086	2.22586	1.18107	0.929292	5.35911
2895	5.7	1	5.7	0	N.D.	3.37417	3.22518	2.37269	5.96714	3.4793	0.40635	3.21936	2.51587	6.26804	1.40265	4.04673	4.00287	4.50113	3.76521	3.84612	2.65665	1.19059	1.57874	0.0132701	4.86488	3.86209	2.70264	4.26251	0.636746	4.18823	0.309903	0.141965	3.4928	2.09142	4.22943	0.312531	2.42524	3.44522	4.5627	0.322865	3.21136	3.79498	3.65205	3.90668	4.30889	2.10304	1.70616	1.06194	5.45481
2896	7.5	1	7.5	0	Normal Karyotype	2.84341	3.30115	2.2236	6.65645	3.2596	0.0893885	3.60845	2.1822	6.50302	1.25815	4.37474	4.51289	4.25378	3.34304	3.71912	2.65859	0.569979	1.55206	0	5.1722	3.59121	3.26382	3.66269	0.600447	3.97616	1.59601	0.398677	3.24389	1.90065	3.93962	0.102896	2.71815	3.18254	4.61674	0.222221	3.28194	3.70636	3.55058	3.74134	4.70779	1.55999	0.745926	1.20257	5.75578
2897	30.5	0	30.5	0	PML-RARA	3.75133	2.88076	2.26935	5.58875	2.7737	0.391577	2.83431	2.73253	4.19076	2.38959	4.09688	2.36969	3.55634	3.3491	3.11925	1.11158	0.0473308	2.34773	0.0369651	0.573746	3.84273	2.83417	5.62149	0.831178	3.26285	0.0840258	0.263678	2.52188	2.79923	4.02681	0.0534483	1.89196	3.18327	3.89055	0.216535	2.64457	3.00302	3.05711	2.90421	4.01831	1.29967	3.28088	2.37344	5.37632
2898	36.1	0	36.1	0	Intermediate Risk Cytogenetic Abnormality	3.10162	3.40743	2.59233	4.64532	3.20692	0.599432	3.02587	2.78196	5.08695	3.2584	4.13265	5.0176	3.88059	3.57684	3.63474	2.4755	0.660199	1.69217	0.14473	5.76219	3.92962	3.05638	4.19471	1.05448	3.97091	0.353105	0.954377	2.62571	3.48753	4.04664	0.245733	2.04391	3.3527	4.03981	0.253044	4.04115	3.9717	3.63483	3.44087	4.65058	2.35271	1.21417	1.98324	5.63941
2899	22.3	1	17.3	1	Intermediate Risk Cytogenetic Abnormality	3.28589	3.96908	2.56974	7.46425	3.75708	0.29137	3.22377	2.76477	5.71777	4.11889	4.27265	6.18916	3.58358	3.96984	3.4817	3.33699	0.464514	1.57934	0.180777	0.361747	4.31758	2.53406	3.57603	4.14084	4.11872	2.60581	1.35753	2.92545	2.50667	4.06222	0.549462	1.94111	2.9245	4.58753	1.27441	3.52829	3.22444	3.93915	3.50722	4.97811	2.67645	1.49513	2.10288	5.89267
2900	6.3	1	4.9	1	Normal Karyotype	2.88789	3.59815	2.52664	7.61413	2.58073	0.198221	3.4159	3.05816	4.1472	3.92246	4.11814	6.1388	4.25973	3.48186	3.39345	2.36493	0.0974577	1.76508	0.0120205	1.02992	4.01642	2.91596	4.59201	0.406051	3.44094	1.97851	0.547407	2.49473	2.28629	3.99094	0.304109	2.43523	2.96433	4.44539	0.367084	3.72102	1.72718	4.40436	3.08711	4.85779	1.72127	2.14002	4.02283	5.31819
2901	10.5	0	3	1	BCR-ABL1	3.58605	3.12541	2.57295	4.75999	2.82572	0.103064	3.73665	2.37162	6.22405	2.4022	3.52185	4.40442	4.09071	3.24742	4.23602	3.01654	0.0367506	1.54254	0.0115401	5.0422	3.68281	3.78902	3.95856	0.248432	4.15015	0.420255	0.292404	3.6395	3.0484	4.136	0.0496827	3.0926	3.55336	4.57855	0.719344	3.70139	3.21472	3.6408	2.6598	4.9124	2.55151	0.390154	3.1611	5.9769
2908	1.4	1	1.4	0	Complex Cytogenetics	2.71736	3.32743	1.89004	6.37207	2.51048	0.273623	2.85531	2.41567	5.4749	3.27709	4.74973	4.18894	4.11106	3.17984	3.14674	2.02098	0.645686	1.57507	0.0617188	2.16463	4.20112	2.99388	3.7546	0.433206	3.49258	1.53796	1.60837	2.58728	1.94335	3.64557	0.268205	2.65458	2.8348	3.06944	1.10265	3.81331	3.21664	2.84154	3.03994	4.42263	1.65719	1.31455	1.67576	6.10778
2910	0	1	0	0	Complex Cytogenetics	2.87894	3.86018	2.18575	7.28672	1.9265	0.578708	3.64372	3.32183	5.74347	3.41135	4.72668	5.02672	2.93966	3.57855	2.92211	2.54054	0.0265071	1.60577	0.00830324	0.0137605	4.23012	3.71409	3.58954	1.21094	2.36495	0.485558	0.315594	2.64133	1.94687	2.92173	0.0206116	2.21778	2.48124	4.82824	0.550501	3.09123	3.18496	4.05939	2.56616	5.21074	2.58453	3.59688	3.70935	6.98127
2911	61.2	0	3.7	1	MLL translocation, poor risk	3.61988	3.63364	3.05717	4.78772	3.42467	0.26623	2.72431	2.83158	5.51766	3.37967	3.67112	6.87382	4.50294	3.5604	3.12502	2.3688	0.0992254	1.96724	0.00483629	3.27015	3.87539	2.31524	4.52068	1.69862	3.41767	4.84651	0.858586	3.10549	2.73093	3.78081	0.373044	2.51589	3.41983	3.81679	0.0664571	3.56026	4.07832	3.86306	3.3795	4.30075	2.05928	4.06042	1.41423	5.35139
2912	8.4	1	8.4	0	Intermediate Risk Cytogenetic Abnormality	3.44128	2.52912	2.91535	6.39416	2.80749	0.633542	3.57482	2.06858	3.91526	4.55297	3.3151	5.05486	4.24585	2.68495	3.24669	2.40652	0.202293	1.85182	0.144206	0.935545	3.88946	2.62082	3.24464	0.566894	4.42129	3.82504	1.62023	3.22097	1.74554	3.6619	0.728608	2.43367	3.62143	4.72897	1.25791	3.84915	3.06158	3.5538	3.47251	5.11051	1.43976	1.78191	4.10144	5.81064
2913	52.6	0	6.1	1	Intermediate Risk Cytogenetic Abnormality	3.58979	2.8605	2.6843	7.30184	3.22567	0.18413	3.23508	2.20825	6.67261	3.1395	3.72279	3.08285	4.58664	3.14398	3.77438	2.33345	0.0330712	1.43561	0.0129579	3.60412	3.69304	2.93906	3.46502	0.789866	4.37555	0.374629	0.357557	3.52568	2.29996	3.79965	0.370051	1.77311	3.65533	4.68063	0.286352	2.49295	3.84951	3.06374	3.47851	4.06602	1.8832	1.04951	0.810005	5.06891
2914	48.3	0	48.3	0	CBFB-MYH11	3.50919	2.35433	2.9832	7.2515	3.2316	1.79255	3.65964	2.15991	6.743	2.76035	3.5568	5.23292	4.25812	2.99757	3.21492	2.93508	0.522414	2.04454	0.0133595	3.25664	3.22486	3.46146	3.54932	1.19254	4.61532	2.75933	0.316603	3.14865	1.84285	3.73768	0.0733859	2.11513	3.56772	4.83811	0.449645	3.4331	4.42821	2.95404	2.98194	4.63925	2.04334	3.57428	1.34799	5.80967
2915	0.5	1	0.5	0	Complex Cytogenetics	3.32259	3.29477	2.78671	6.25573	3.30657	0.103194	3.21986	2.93858	5.62103	2.2791	3.9831	6.18229	4.10386	3.37192	3.71756	3.05568	0.418614	1.40354	0.00652965	2.08492	3.97967	3.71326	4.68348	0.931465	3.951	2.06034	1.153	2.90686	1.10592	4.00008	0.226055	3.17496	2.47941	4.39904	0.148304	4.16387	2.2318	4.0518	3.57862	4.60463	2.28695	1.27545	2.84409	5.96289
2916	45.3	0	45.3	0	Intermediate Risk Cytogenetic Abnormality	3.66185	3.21384	3.58133	5.57191	3.94341	0.139301	3.03414	2.21087	4.33946	1.7466	2.76704	7.23945	4.28989	2.99456	3.1238	3.88782	0.185832	1.87468	0.0265947	1.05742	3.45407	3.16096	3.96565	2.04307	4.26694	3.90973	1.06047	2.72548	2.45571	3.72209	0.578028	2.82469	3.25536	4.15236	0.284119	4.36413	3.12922	3.9491	4.00954	4.11611	2.04326	1.42147	1.89459	4.57168
2917	57.3	0	39	1	Complex Cytogenetics	4.03549	2.98988	2.83414	6.20312	3.99654	0.300547	3.49563	2.25153	4.54146	2.48989	2.00056	4.38572	4.04795	2.68559	3.94122	3.22781	1.32713	2.09871	0.0194092	4.75425	3.41118	2.66464	2.8657	2.7335	4.732	1.18842	0.585129	4.15366	3.01122	3.9052	0.388417	1.96943	3.43687	4.47058	0.457013	3.17883	4.59367	2.98086	3.80806	4.87441	1.54901	1.52875	2.86576	4.90008
2918	7.4	1	6	1	Intermediate Risk Cytogenetic Abnormality	2.81185	3.34394	2.21265	6.77891	2.43277	0.0913638	3.40857	2.43133	6.31038	2.20298	4.09681	4.75165	3.73514	3.61468	3.65782	2.80802	0.233141	1.5872	0.0124482	1.86121	4.00018	3.12815	3.60231	0.414507	3.54897	2.41241	0.208957	3.06355	2.50758	3.67055	0.149739	2.08083	3.12887	4.15871	0.775444	3.65905	2.92067	3.67224	3.54568	5.16666	2.01808	1.09711	0.871979	6.27082
2919	26.8	0	26.8	0	Normal Karyotype	3.33519	3.35504	2.45236	6.8007	3.22051	0.306648	2.97171	2.67895	6.86222	2.53807	4.3609	1.97869	3.86706	3.72261	3.70848	2.51241	0.717596	1.51678	0.0101543	6.70586	4.08501	2.65623	4.09786	0.829001	3.90975	0.101031	0.543308	3.18239	3.03825	3.81886	0.0682216	0.623707	3.45614	4.1669	0.726371	2.60081	4.07289	3.31313	3.29983	4.95035	2.32994	0.504641	0.858975	5.98561
2920	11.8	1	5.2	1	Complex Cytogenetics	2.29278	3.4627	1.85454	5.67723	1.8449	0.181915	2.61893	3.01221	7.71187	1.80901	5.15284	4.75087	3.67292	4.19722	3.1199	3.12828	0.174742	1.39237	0.00320884	3.9109	3.88713	2.0297	4.69114	1.01674	2.79274	0.902693	1.02564	2.48483	2.12372	3.38786	0.459112	2.12123	2.22086	2.5697	0.364683	3.73285	4.06346	4.12962	2.20868	5.22663	2.77882	1.38881	2.59222	5.96801
2921	8.1	1	6.3	1	Normal Karyotype	3.04594	3.37334	2.35272	6.88494	3.27912	0.134333	3.33255	2.29053	7.18576	1.6627	4.35487	5.7401	4.27693	3.34668	3.22143	2.79072	0.0434844	1.54383	0.00254249	3.23663	3.64838	3.57936	3.78865	0.902303	3.60375	2.22247	0.612318	2.75142	2.16984	3.89804	0.0605644	2.77125	3.08586	4.62771	0.347549	3.45322	3.84987	3.7895	3.66364	4.07516	2.23284	1.41367	1.35832	5.53802
2924	26	0	26	0	Normal Karyotype	3.02635	3.11704	2.85291	7.50213	3.14018	0.0542922	3.02063	2.63838	4.78851	2.64381	3.92064	5.68893	4.24221	3.54149	3.4538	3.11576	0.203108	1.76919	0.00313957	2.64937	4.09409	3.56201	4.41983	0.611666	3.55995	2.71723	0.498458	2.83246	2.25372	3.82922	0.197412	2.36153	3.22094	4.49608	0.0773158	3.75975	2.83982	3.9184	3.73975	4.54768	1.95733	1.53792	1.33786	5.016
2925	7.9	1	7.8	1	Normal Karyotype	3.20247	3.63674	1.84408	6.72121	2.65316	0.175414	3.23154	2.98837	4.83099	4.55557	4.12634	5.37275	3.41712	3.4267	3.02793	2.56297	0.0560845	1.31469	0.00887332	0.830679	4.52343	3.30062	4.18527	1.30974	3.09312	1.87104	0.443598	2.08268	1.65542	3.72824	0.0329056	2.84502	2.26238	4.57619	0.286199	3.65579	2.19369	4.17301	2.90371	5.11239	2.5449	2.34235	2.09792	5.76511
2927	2.4	1	2.4	0	Normal Karyotype	3.35903	3.57688	2.50248	7.50121	2.74625	0.822756	2.89778	2.45527	4.26474	3.43431	4.27606	6.14028	3.61506	3.37384	3.39673	2.15484	0.21501	1.51621	0.0917873	0.0708566	4.08151	2.79127	3.85907	2.69027	3.93929	2.32729	1.45991	3.10845	1.98025	3.75648	0.501521	1.99473	3.09581	4.00868	1.47172	3.25622	3.33564	3.92032	3.76677	4.31907	1.56394	3.37279	3.56785	5.58431
2928	4	1	4	0	Poor Risk Cytogenetic Abnormality	2.71581	3.10791	2.44386	6.15909	3.0347	1.46854	3.54802	2.62673	7.06957	1.84227	4.26128	3.20842	4.04292	3.41688	4.13112	3.11581	1.36301	1.75015	0.00338717	6.68805	3.49572	2.97084	3.9937	1.53403	4.28102	0.434286	0.23924	3.01452	2.60375	3.82768	0.0313594	0.968159	2.81142	3.94317	0.337997	3.79637	4.23802	3.24008	3.63793	4.91811	1.78625	0.262979	3.51425	5.63447
2929	4.6	1	4.6	0	Complex Cytogenetics	3.45143	3.57273	2.09101	6.23812	3.84548	0.232234	2.83227	2.40086	5.10442	2.3542	4.18638	5.21935	4.07886	3.58057	3.90563	2.88471	0.477217	1.51267	0.0142433	5.09431	3.6272	2.75559	3.58299	2.66785	4.42809	1.71925	1.01228	3.00624	2.29863	4.30176	0.484233	1.54684	2.63805	4.77707	0.298461	3.74995	3.61309	3.47864	3.70366	4.62995	2.3115	2.81996	1.09967	5.84362
2930	7.1	1	4.8	1	Normal Karyotype	3.17117	3.2598	2.2203	7.0731	2.74546	0.0627295	3.23026	2.32634	7.39437	3.82133	4.3611	4.50067	3.98628	3.65895	3.51187	2.35543	0.0323957	1.37816	0	3.845	3.79784	2.40761	3.36642	0.966734	3.73654	2.8311	0.615469	2.80672	2.20386	3.74122	0.0972792	1.23223	3.20871	4.38825	2.93423	3.31485	4.30832	3.70112	3.38457	4.94599	2.43556	1.55759	0.730293	6.02263
2931	0.1	1	0.1	0	Normal Karyotype	3.32077	3.37717	2.10255	7.1668	3.47617	0.189763	3.57477	2.45342	5.72417	2.02389	3.96241	4.6536	4.78199	3.45052	3.6947	3.1153	0.669611	1.55496	0.00298386	4.12594	3.9513	2.91897	4.10441	0.648575	3.91055	0.871257	0.249336	3.37076	2.80535	4.15952	0.112757	1.8446	3.28897	4.73904	0.3746	3.38901	3.6211	3.56026	3.97512	4.33373	2.15527	2.4759	1.68211	5.90274
2932	42.1	0	42.1	0	Normal Karyotype	2.93336	3.80847	2.86246	6.68811	2.95216	0.127645	3.16955	2.71256	3.42627	1.84126	3.94466	6.73689	3.82114	3.47565	3.20298	2.78464	0.11384	1.40062	0.0249227	0.959868	4.59154	3.54966	4.81102	0.225576	2.87669	1.44412	0.975042	2.45072	2.07733	3.78837	0.0513033	2.12996	2.64407	4.04196	0.155961	3.71944	1.83062	4.91863	3.03093	4.78649	1.73589	2.91515	2.01968	5.59951
2933	4.6	1	4.6	0	Intermediate Risk Cytogenetic Abnormality	3.40511	3.30394	2.73166	6.96205	3.34894	1.51216	3.2743	2.11219	5.29605	2.56054	3.25432	6.26645	3.77794	3.00522	3.06609	2.67731	0.424746	1.66409	0.0249846	2.63713	3.5275	2.78312	3.63783	2.71803	4.25457	3.168	1.25661	3.1405	2.32465	3.57491	0.580507	1.78832	3.22785	4.01606	1.23196	3.27374	4.07235	3.65528	3.26861	4.58781	2.17809	1.17687	3.18028	5.68693
2934	6.6	0	2.7	1	Normal Karyotype	3.04624	3.84038	2.47528	6.73532	3.28314	0.230142	3.04633	2.62145	5.59546	1.8541	3.93415	6.46098	4.13205	3.76538	3.8583	2.82664	0.242269	1.25128	0.00341734	4.76935	3.57173	3.49736	4.27295	1.0261	3.5185	2.15813	0.740753	2.58547	2.4799	3.9235	0.104847	2.81622	2.83564	4.04542	0.532212	4.26615	2.92383	4.0806	3.449	4.06838	2.24993	2.02895	2.52249	5.03068
2935	1.6	1	1.6	0	Complex Cytogenetics	3.65065	3.5605	3.05691	5.64793	2.97769	0.247011	3.33299	2.6069	6.64295	3.30495	3.80199	5.72084	4.16884	3.41859	4.08777	2.7885	0.611782	1.54269	0.0790681	2.06655	4.2603	2.87489	4.01855	1.30365	3.76444	2.37445	2.8385	3.30486	2.70313	3.74013	0.270083	3.85987	2.77974	3.75702	1.86344	3.75254	3.18059	3.74825	3.62884	4.59439	2.09797	1.40252	2.80796	5.57144
2936	13.8	0	13.8	0	Normal Karyotype	3.37254	3.25197	2.32441	8.29315	4.0626	0.261222	3.02215	2.42095	5.64336	2.68862	3.79457	4.82494	4.1687	3.5856	3.82613	2.81287	1.08548	1.62989	0.0106364	3.27417	3.63946	3.45649	3.69209	2.46161	4.07172	1.53696	1.51762	3.12423	2.01224	4.02489	0.181097	2.06141	3.69833	4.12259	0.443762	3.38969	4.22442	3.23467	4.13442	4.54589	1.71907	0.670232	2.06404	5.69506
2937	8	1	4.6	1	RUNX1-RUNX1T1	2.79241	3.3349	2.9372	4.88024	2.67739	1.00756	2.82735	2.43492	6.64364	3.798	4.22385	3.89812	4.25907	3.77719	2.21668	1.9109	0.0396468	1.73537	0.00831736	3.71423	3.53466	2.10156	4.15268	0.355586	2.98832	1.14927	0.623603	2.31524	2.15056	3.08008	0.236796	1.23305	2.84902	3.36075	0.981169	2.95981	2.82993	3.65792	2.41571	4.09521	2.94029	1.00434	1.00982	6.63729
2938	9.9	1	7.2	1	Normal Karyotype	3.35371	3.00552	1.94089	1.27759	3.37417	2.8463	3.35019	2.90723	6.77293	4.28715	2.50527	4.17769	3.47969	3.28857	3.71987	3.54404	0.738547	1.65771	0.335515	1.94864	4.66142	2.53268	4.15989	1.10627	4.37584	0.931703	1.68684	2.95511	2.79852	3.97634	0.107416	3.30899	3.0011	4.42985	0.672014	2.60114	2.23775	3.63908	2.92857	5.49473	2.34791	1.29656	3.09832	5.87101
2939	36.9	0	36.9	0	Complex Cytogenetics	3.27033	3.35745	2.76486	6.5092	2.21287	0.216145	3.0168	2.37949	6.24049	3.31834	4.23158	4.60502	4.07404	3.57267	3.80557	1.46574	0.0378	1.36487	0.0295003	0.0957252	3.77447	3.13231	2.89165	0.219297	3.85706	1.89157	0.417661	3.2521	1.74716	3.6992	0.00617847	1.24326	2.62941	3.16857	1.13247	3.35479	4.57987	3.15653	3.55098	4.78045	1.94872	0.665194	0.73216	5.63261
2940	55.4	1	14.6	1	Intermediate Risk Cytogenetic Abnormality	3.7119	3.2498	2.63454	5.28346	3.29695	0.144434	3.30623	2.74395	5.79031	3.51142	3.80185	5.38977	3.68451	3.55043	3.42307	1.83193	0.43089	1.49518	0.066407	4.47476	3.93721	3.51236	4.1067	0.945183	4.05293	1.45819	0.875491	2.58291	2.67545	4.20699	0.0756335	1.87156	3.11591	5.00198	0.497221	3.40599	3.65363	3.58871	3.42954	5.03225	2.32667	2.31227	1.00203	6.22574
2941	0.2	1	0.2	0	BCR-ABL1	2.68964	4.04576	1.70491	1.74017	3.03866	0.0949384	3.90459	2.32032	5.90933	3.13771	2.37087	3.58826	4.05184	3.66276	3.19708	3.24677	0.169063	1.60324	0.0326469	0.234119	4.08507	3.54995	4.13909	3.28775	3.5765	0.176083	0.73861	2.48074	2.72304	4.42398	0.0496479	3.72773	3.0045	5.08092	1.27827	2.28554	3.25858	4.13282	2.71881	4.98855	1.76028	0.384839	4.82037	5.123
2942	43.5	0	43.5	0	CBFB-MYH11	3.2707	2.87411	2.94694	6.19239	3.11376	1.00933	3.52374	2.49245	5.75048	2.43359	4.17916	5.7028	4.48527	3.3033	3.18131	2.68347	0.315726	2.10504	0.0118921	4.23035	3.4452	3.27328	3.64953	1.01662	3.83511	2.21291	0.600318	2.91384	2.13787	3.52215	0.107527	1.77948	2.95783	4.19847	0.35489	3.87856	3.68159	3.13705	2.93391	4.59183	2.00386	3.27559	2.24439	5.83426
2943	4.2	1	4.2	0	Complex Cytogenetics	3.25318	3.12815	2.23829	6.8979	3.40779	0.347615	3.30275	2.61328	5.37678	2.8993	4.25489	4.33596	4.34356	3.27605	3.51163	3.54347	0.273622	1.3994	0.0849788	3.87532	3.7355	3.1607	3.76362	2.55482	4.18797	2.50588	1.9302	1.88672	2.23699	3.76186	0.181036	2.72285	3.48372	3.57414	0.820983	3.02845	4.14453	2.66287	3.91863	4.64811	2.73214	1.28753	1.78558	5.45993
2944	2.4	1	2.4	0	Poor Risk Cytogenetic Abnormality	3.17861	3.30215	2.58977	7.21285	3.14779	0.169044	3.69201	2.32029	4.27675	1.38694	4.75417	4.7603	3.82298	3.16676	3.79828	3.201	0.679705	1.76391	0.00374869	2.9642	3.17762	2.34687	4.03196	1.56258	4.28363	1.03711	0.224598	3.08771	2.35381	3.78326	0.184229	1.41759	2.81544	4.44872	0.588872	3.29332	2.93416	3.2466	3.50266	4.05319	1.74182	2.53322	3.44256	5.20846
2946	24.4	0	20.8	1	N.D.	3.12757	2.98592	2.7598	5.08673	3.19009	0.228288	3.28016	2.51545	5.17958	2.17858	3.95856	5.21276	4.28177	3.3179	3.45631	2.94305	0.218017	1.71032	0.0597926	4.37783	3.74093	3.6638	4.08503	0.342294	3.88948	2.61117	0.848399	2.96819	2.71029	4.09797	0.228265	1.2851	3.03263	4.3223	0.187285	2.94424	3.59726	3.36752	3.55046	4.70931	1.99245	1.98009	0.635486	6.14694
2948	18.1	1	18.1	0	Normal Karyotype	3.13203	3.2714	2.77144	5.67724	2.83473	0.18214	3.05367	2.80358	4.5439	3.08368	3.79074	6.52956	4.16222	3.48315	3.42686	3.2202	0.243899	1.50113	0.0541147	1.70736	3.95302	3.68718	4.23506	0.959111	3.22872	1.87761	1.85652	2.59807	2.5634	3.78389	0.206204	3.04584	2.9211	4.14009	0.0680439	3.76487	2.48836	4.1988	3.54681	4.86719	2.19923	0.544139	2.75558	5.57127
2949	32.6	0	32.6	0	Complex Cytogenetics	2.90303	3.20088	2.46058	7.05607	3.23005	0.262186	3.37893	2.58037	5.70739	1.24401	4.73416	4.79034	4.18206	3.0807	3.58028	2.98749	0.734051	2.08679	0.0268281	6.10858	3.82171	2.36413	3.82181	1.35338	4.36035	1.53223	0.327748	3.48126	2.44485	3.80548	0.312389	1.87951	3.0098	4.03724	1.28373	2.92166	3.7573	3.12285	3.81035	4.24409	1.4268	2.89748	4.42285	5.77565
2950	40.3	0	40.3	0	RUNX1-RUNX1T1	3.28175	2.80783	2.56072	6.76125	3.27675	0.252261	3.84324	2.20578	5.74358	3.84542	2.59215	2.5996	4.32413	3.17948	3.61552	2.63691	0.124017	1.70368	0.0824626	1.35768	4.16232	2.84318	3.26859	0.591112	4.23894	1.88297	0.538597	3.03423	1.95013	3.97072	0.00659634	2.4555	3.45802	4.76639	0.533394	3.30117	2.04147	3.10609	3.17651	4.60942	1.62663	0.522003	3.237	5.91466
2952	1.9	1	1.9	0	Complex Cytogenetics	2.72898	3.8112	1.79028	4.98038	2.57424	0.867753	2.68425	3.08022	6.84807	4.43185	4.4692	6.89721	3.27928	4.24573	3.49493	2.87541	0.146389	1.27217	0.0158983	3.53024	3.86686	2.68449	4.46536	1.91936	2.58648	1.21382	1.3545	2.25055	1.53128	3.63368	0.0528232	2.91214	1.9335	2.97617	0.969593	3.44905	3.43538	4.479	2.9636	4.75472	2.549	1.69827	2.33681	6.05021
2955	16.4	1	9.6	1	Normal Karyotype	3.39117	2.14371	2.73903	6.16152	3.96848	0.216269	2.91363	2.11474	5.48605	1.5792	2.99929	1.51691	4.54469	2.90223	3.5102	2.54888	0.494007	2.26439	0.0216673	4.40088	3.19133	2.47512	3.12101	0.422991	4.96173	4.17291	0.218207	3.49645	2.21779	4.3323	0.286016	1.34015	3.82279	4.67062	2.06212	2.85359	4.37081	2.65336	4.02202	4.28276	1.64646	0.37022	0.531378	5.85262
2956	5.7	1	3.2	1	MLL translocation, t(9;11)	3.2265	4.04293	2.54092	7.86598	2.87382	1.16401	3.74183	2.69346	3.50966	1.63172	4.02313	5.44785	3.75221	3.38254	3.09487	3.3024	0.0374484	1.65236	0	0.0162481	4.0185	3.79838	3.80165	1.33388	3.50719	3.2008	0.581273	2.59546	1.9613	3.82136	0.252549	2.47255	2.72654	4.60069	0.189611	4.02584	2.46405	4.31592	3.5243	5.09862	2.46733	2.33966	2.31797	5.55061
2959	15.4	1	13.4	1	Intermediate Risk Cytogenetic Abnormality	3.91273	2.90345	2.95059	8.83563	4.29703	0.201355	3.38518	2.17814	5.91503	2.75916	3.27188	4.89696	4.59295	3.06983	3.52081	3.17409	0.603736	2.1764	0.0576254	0.209323	3.21458	2.68013	3.18592	1.97495	4.95977	1.56824	1.4121	3.5459	2.39917	3.97814	0.748364	1.22805	3.77172	4.34942	0.700375	3.09986	4.15747	2.58389	4.20022	4.77801	1.24384	0.747403	2.56623	5.33532
2963	53.9	1	53.9	0	Normal Karyotype	3.64879	2.67092	3.15324	7.10551	2.99466	0.124473	3.87724	2.29746	6.63267	3.25275	3.34552	4.91842	4.15348	2.92265	3.23519	2.9673	0.444346	1.4959	0.00859026	2.86919	3.76809	3.10395	3.47766	0.544744	4.06785	1.00533	0.292027	3.04875	2.62747	4.00617	0.228006	2.72071	3.29524	5.25968	0.349238	3.68104	3.70643	3.3323	3.15596	4.52608	2.02476	1.53283	0.942884	5.52647
2965	11.3	1	9.9	1	Normal Karyotype	3.7496	2.96332	3.12538	7.0877	3.36466	0.187619	3.97112	2.2039	5.89006	2.53906	3.02134	4.90638	4.14065	2.53576	2.95122	3.1233	0.409124	1.6574	0.0221385	2.48532	3.71226	3.76391	3.54827	0.562579	4.10495	1.74629	0.380671	2.84198	2.5999	3.88075	0.23079	3.16281	3.1935	5.18965	0.14463	3.49592	2.40991	3.46604	3.64029	4.64044	1.82173	0.890778	2.26167	5.351
2966	28.4	1	8.6	1	Normal Karyotype	3.65464	2.56148	2.80215	5.19529	4.09345	0.209157	2.94579	2.19666	4.80529	2.14888	3.79319	2.3089	4.30733	3.42462	3.77436	2.78176	0.580553	1.88562	0.00425578	5.71396	3.74657	3.03838	3.52299	1.56764	5.00306	2.55437	1.05927	3.08741	2.73641	3.99715	0.228028	0.781461	3.75504	4.71991	0.55043	2.29919	5.89981	2.70505	3.71228	4.56598	2.15463	0.349537	0.430557	6.08198
2970	10.7	1	8.3	1	Normal Karyotype	3.91033	3.31088	2.84867	6.8455	3.25665	0.494443	3.37643	2.23028	5.08254	3.82274	3.6553	5.24437	4.01506	3.19398	3.54115	2.88237	0.218442	1.52762	0.266158	2.51831	3.83444	3.16956	3.61562	2.17119	4.36235	2.97835	1.02818	3.00029	2.27017	3.78232	0.212347	3.11185	3.28341	4.44456	0.515976	3.11977	3.64621	3.32626	3.77213	4.72401	1.88886	1.10283	2.6069	5.57497
2971	25.8	1	17	1	Normal Karyotype	3.44231	3.06364	2.98185	7.03522	3.63798	0.151108	3.22708	2.69289	3.92305	1.90357	3.02182	5.90068	4.43917	3.32311	3.35222	2.52888	0.42718	2.26756	0.00902151	3.19951	3.77034	2.79975	4.03488	2.16116	4.05841	3.00671	1.06388	3.52137	2.65162	3.80234	0.269331	2.38714	3.39513	4.03544	0.255494	3.70183	2.99243	3.53925	3.7301	4.58509	1.4909	1.4702	1.82583	5.2173
2973	20.5	1	12	1	Normal Karyotype	3.46207	3.44632	3.29117	4.03208	3.48175	0.389623	2.92295	2.26711	2.97167	1.95993	2.60134	7.02472	4.36143	3.1717	2.95315	2.32931	0.143181	1.78089	0.0594939	1.0346	3.5433	3.5426	4.39177	1.84511	3.85231	1.88058	1.41844	2.68347	2.64035	3.8612	0.472964	3.42977	3.27072	4.2869	0.0479215	3.76037	2.35005	3.89944	3.79593	4.03507	1.5596	1.36813	1.12096	4.73914
2975	34	1	8.5	1	Normal Karyotype	3.14623	2.87424	2.82406	8.03318	2.94224	0.465983	3.50844	2.61265	7.40589	1.96543	3.78556	3.01934	4.17153	3.17232	3.15149	2.64355	0.591948	2.56282	0.00412101	3.15512	3.98223	2.91351	4.13792	0.381938	3.24683	0.409578	0.960964	3.16082	2.64147	4.1286	0.383898	1.92002	3.26425	3.8584	0.487073	3.43423	3.14338	3.27988	2.95344	4.87667	1.94095	0.0927005	4.2241	5.6014
2976	30	1	7.7	1	Normal Karyotype	3.49711	2.9848	2.53456	6.97912	2.91283	0.192955	3.68367	2.40564	5.98749	2.40114	3.13269	3.15173	4.4673	3.02379	3.51372	1.98338	0.524824	1.81897	0.0111519	2.29015	3.59276	3.45337	3.7768	0.776163	3.80937	0.654246	0.488689	3.35963	2.58181	4.05326	0.60627	2.90409	3.42289	4.6918	0.647543	3.24061	3.91574	3.33051	3.33287	4.77068	1.52389	0.713781	1.83668	5.26337
2977	0.8	1	0.8	0	Normal Karyotype	2.79674	3.73147	1.98104	5.9041	2.60277	0.0826386	2.61652	2.72223	4.75274	1.84975	5.62224	6.35818	3.67292	3.23704	2.30525	2.01419	0.194845	1.50241	0	3.19021	3.92742	3.37169	4.99945	0.858761	3.0547	0.894923	0.535777	2.53279	2.45473	3.89824	0.0918665	2.08722	2.48658	3.26006	0.0374942	3.74363	2.63154	4.54524	2.90002	3.08587	1.66087	0.592268	2.65578	5.35164
2979	47	0	47	0	Normal Karyotype	2.57136	3.41412	1.86223	6.4004	2.36457	0.345252	2.44173	2.70266	6.37803	4.02424	4.70049	4.15318	3.54548	4.03197	3.28056	2.48842	0.0322537	1.39999	0.0848798	4.59659	3.90771	2.8692	4.20696	0.864515	2.81373	2.05987	0.39404	2.36738	1.83665	3.95843	0.00526343	1.5692	2.60569	3.90641	1.32103	2.49637	3.07904	3.97391	3.07023	4.80092	2.31935	0.761618	0.69758	6.73831
2980	47.5	0	47.5	0	PML-RARA	3.56008	2.78541	2.09078	6.65832	2.5258	1.45724	3.75599	1.96689	5.80515	3.6599	2.73197	1.95355	3.97964	2.80116	3.3954	1.85703	0.336253	1.8707	0.164197	1.66369	4.16694	3.46897	2.85916	1.10439	3.71963	0.313171	0.425013	3.07461	3.20469	3.69065	0.0238869	1.96772	3.17477	4.84287	0.616138	3.36981	4.08975	2.59088	3.29309	4.6118	1.76743	3.59487	2.80598	5.96018
2981	44.4	0	44.4	0	Normal Karyotype	3.27027	3.73894	3.23958	5.80339	3.95548	0.057706	3.34117	2.33249	4.0723	1.60056	3.13809	7.85618	4.19321	3.61423	3.25267	2.92039	0.16506	1.72632	0.00292355	1.91789	3.67194	4.19111	3.96145	0.491272	3.51123	1.91824	0.806614	2.53541	1.68397	3.98145	0.382304	3.7631	2.6311	4.35966	0.0564033	4.09531	1.47697	4.23288	3.56882	4.42281	1.57085	2.04325	2.13879	4.66381
2982	37.1	0	37.1	0	PML-RARA	3.24683	2.98132	2.26608	5.99849	2.9646	1.11359	3.08312	2.35121	6.10621	2.63089	3.84259	2.29854	3.56712	3.09216	3.62359	1.66278	0.23685	1.99623	0.398269	2.22294	4.62463	3.46857	3.31733	2.20928	3.4529	0.62813	1.19733	2.86681	3.00681	3.63123	0.063706	1.76437	3.17232	3.95765	0.253501	3.59004	3.53885	2.77651	3.41899	3.98644	1.44799	3.36533	2.92253	5.57399
2983	11.2	1	3.8	1	Normal Karyotype	3.81823	3.13949	2.52583	8.05713	2.99803	0.742353	3.21625	2.32036	5.71554	3.24871	3.71081	4.28407	3.9491	3.1911	3.52329	2.70451	0.15361	1.56112	0.113873	1.56224	3.51908	2.64415	3.56053	1.78333	4.18755	3.11447	0.646547	2.77652	2.49757	3.8414	0.440054	1.72481	3.44815	4.28793	1.67558	2.88883	4.86238	3.25019	3.58759	4.77547	1.96705	2.78242	1.094	5.48997
2984	71.3	0	71.3	0	Normal Karyotype	4.43589	3.10055	4.00616	5.26616	1.86088	0.185152	3.21012	2.68501	5.5935	2.938	5.34665	3.26779	4.04631	2.44403	1.58606	1.43788	0.859975	1.47568	0.00921285	4.92097	4.31133	2.42128	3.7158	1.06663	3.68043	1.22023	0.17706	3.56761	3.09381	2.48846	0.223661	1.41069	3.62981	2.99512	0.112294	1.59472	4.37527	2.87476	2.77182	3.36374	1.20661	0.23069	0.635565	4.69426
2986	6.6	1	6.6	0	Normal Karyotype	3.40436	2.60826	2.15983	6.29111	2.9458	0.259685	3.61205	2.44954	6.64297	2.63079	4.51998	3.91025	3.78457	2.69265	2.56985	1.78727	0.69677	1.5107	0.00805906	3.37705	3.73065	3.26053	4.14682	0.589289	4.5231	0.4553	0.66387	2.26084	2.49469	3.41777	0.164076	2.23333	2.60445	4.75384	0.109219	2.79047	3.23584	3.59501	2.93494	3.84876	1.8881	1.73015	0.623069	5.82013
2987	6.3	1	5.3	1	Normal Karyotype	3.41218	3.96124	3.48233	2.83334	3.68475	1.30296	3.24701	2.55633	3.4599	0.860073	2.49879	8.05367	3.50816	3.14203	2.68505	2.71574	0.419454	2.1501	0.201233	0.13894	3.3635	3.78225	4.18766	2.50432	4.11465	1.64524	1.59151	2.13453	1.89806	4.04	0.50809	3.78463	2.67545	4.57823	0.0305058	3.30182	2.7527	4.50573	3.65914	3.72554	1.48745	3.28832	3.96183	4.98145
2988	0.8	1	0.8	0	Normal Karyotype	3.14808	3.30245	2.38273	6.729	3.39639	0.131473	3.59216	2.38249	5.67643	3.24469	3.98981	4.20633	4.4606	3.30811	3.84231	2.79159	0.843198	1.55129	0.0039045	2.2198	3.99337	3.03399	3.57556	0.859791	4.08274	0.98325	0.728017	3.3176	1.76189	3.90739	0.105687	2.96645	3.38934	4.92709	1.59287	3.68903	3.28443	3.43055	3.76587	4.68076	1.97054	0.567571	1.02749	5.57655
2990	42.1	0	34.1	1	Normal Karyotype	3.14742	2.96079	2.47725	7.28841	2.59472	0.242585	3.51185	2.78874	5.90841	4.08937	3.77187	3.79436	3.73567	3.03847	3.42085	2.36863	0.461745	1.77269	0.00327907	3.78268	3.98403	2.94661	3.53559	1.3986	3.58831	0.466845	1.50807	3.33756	2.92519	3.56889	0.0542103	1.51176	2.78924	4.1644	0.601716	3.06218	3.53034	2.9603	2.9915	4.8456	1.7937	0.783641	1.57413	5.904
2991	88.3	0	88.3	0	PML-RARA	3.45562	3.28121	1.96287	5.88579	2.76191	0.795337	2.97984	2.37702	4.94889	2.66507	3.56496	1.92034	3.73626	3.47705	3.46186	2.07602	0.0843456	2.21954	0.0562408	2.33086	4.64736	2.80063	4.05712	1.44489	3.4326	0.79483	0.652562	2.51222	2.67088	4.03451	0.00763916	1.27865	3.16517	4.07495	0.647152	3.88794	3.76643	2.98609	3.34072	4.71343	1.15019	4.65401	2.76468	5.6104
2992	56.3	1	11.9	1	Normal Karyotype	3.03303	3.29012	2.9816	4.58859	3.1711	0.909989	2.97564	2.50384	5.86469	4.00538	3.18852	6.20728	3.57667	3.65557	3.26145	2.86409	0.371193	1.48237	0.228919	2.93655	3.903	3.61754	3.83688	1.60337	3.60956	1.80701	1.33783	2.2395	3.63021	3.77639	0.158279	3.04808	3.34115	4.1296	0.370568	4.23214	3.08144	3.89487	3.69649	4.93437	2.16126	0.522052	1.66655	5.37492
2994	83.5	0	24.2	1	PML-RARA	3.11202	3.63001	2.17	5.69554	2.93705	2.11205	3.01167	2.83706	4.95575	2.5388	3.76031	4.02953	4.4926	3.87513	3.81696	2.68473	0.0490405	1.73608	0	1.37487	4.50527	3.33161	4.41661	1.57138	3.1416	0.385453	0.867457	2.97402	2.90216	4.19089	0.0860887	2.11014	3.0734	3.91922	0.0708933	4.45237	3.30557	3.67769	3.54951	4.62632	2.24045	3.37987	2.7851	5.1258
2995	73.6	0	69.7	1	Normal Karyotype	3.46053	3.47037	2.04818	5.15087	3.28945	0.922624	2.99075	2.68926	5.63594	3.50634	3.35937	3.67961	3.82072	3.53883	3.53624	2.93006	1.49865	1.78865	0.123045	4.61351	4.0288	2.9564	3.75898	2.227	4.15928	1.77527	1.5814	3.09196	2.5624	4.01294	0.342773	2.53242	3.36645	4.49607	0.772553	3.93101	3.22061	3.88047	3.74621	4.74278	2.04753	1.74519	2.6936	5.66547
2996	73	0	73	0	Normal Karyotype	3.2955	2.89053	2.85159	5.15876	3.30524	0.552423	3.12204	2.47661	5.7653	3.70471	3.55902	5.74027	3.8819	3.68204	3.55463	2.82599	0.998039	1.39449	0.187122	1.26647	3.98048	3.20459	4.09608	1.07076	3.95562	1.20679	1.23477	2.60464	1.494	4.135	0.365416	2.85525	3.36349	4.25224	0.269553	3.98868	3.14737	3.5837	3.58137	4.63748	2.1446	0.426021	2.40769	5.80894
2998	1	1	1	0	PML-RARA	3.38546	3.40639	2.4256	7.31822	2.53293	1.34138	3.43781	2.39293	6.18761	2.78093	3.78797	2.02918	4.67429	3.32479	3.64269	2.71911	0.0202131	1.59922	0.00351574	1.22459	4.69233	4.4911	3.546	0.424964	3.46461	1.02805	0.233303	2.64039	2.65484	4.09462	0.00656655	1.79289	3.16459	4.46949	0.211099	4.10113	3.46061	3.39955	3.25463	5.06977	2.46405	3.1639	3.66145	6.03231
2999	83.3	0	83.3	0	PML-RARA	3.49807	2.79408	2.37335	6.17853	2.99653	0.669682	2.63218	2.34222	6.148	1.85598	3.59527	2.13141	3.60784	2.88735	3.69103	1.24113	0.10885	1.72931	0.0449139	2.8501	4.41152	3.7661	3.33452	1.38704	3.56791	0.205516	1.01698	2.8857	3.22264	4.0677	0.0121342	1.68529	3.03468	4.00824	0.281703	3.97356	3.81255	2.63644	3.44335	3.50525	1.74564	3.36841	1.90879	5.30691
3000	67.7	0	67.7	0	Normal Karyotype	3.35907	3.16944	2.76407	7.33274	3.46975	0.17183	2.98593	2.48882	6.92569	3.23615	4.45024	4.81114	4.14499	3.8208	3.28125	2.63844	0.536879	1.53655	0.0534219	3.81283	3.79709	2.4614	3.97433	0.488547	4.0476	2.49553	0.318757	2.70962	2.6459	4.24766	0.0135042	0.892777	3.03185	4.53934	2.27543	3.17084	3.16087	3.9771	3.53053	4.94426	2.41625	0.698084	0.381101	6.3072
3001	76.2	0	76.2	0	PML-RARA	3.66113	3.23789	2.28058	7.09492	2.92208	0.480087	2.76547	2.46966	5.37056	2.70093	3.61774	3.25935	3.5189	3.531	3.66714	2.36861	0.182064	1.75201	0.217628	3.97801	4.33484	2.91643	3.86483	1.55622	3.7191	0.961483	0.956972	2.53265	2.65054	3.95834	0.0156011	1.53411	3.27345	4.27335	0.559248	3.83065	4.31174	3.4113	3.32956	4.22701	1.70116	5.22766	1.9682	5.53681
3002	46.8	1	26.2	1	Normal Karyotype	3.54032	3.12385	2.20907	7.51918	2.11001	0.826239	3.41166	2.69767	4.91165	3.29624	3.84601	5.53653	3.865	3.35164	3.44222	2.62639	0.283864	1.87854	0.0753069	0.325235	3.99946	2.01536	4.17006	0.648708	3.88384	2.49627	0.878608	2.85618	3.02668	3.38087	0.123856	1.73933	3.43959	4.37415	0.998397	2.49319	4.14728	3.31642	3.8091	5.03347	1.4049	0.522256	4.22178	5.85571
3007	75.8	0	75.8	0	PML-RARA	3.25304	3.18937	2.09983	6.44261	2.47425	0.43826	2.82065	2.41439	7.07626	2.9778	3.56331	2.43917	3.58428	3.38737	3.68547	2.0174	0.466628	1.52201	0	2.26653	4.75211	2.9451	3.16539	1.01204	3.45737	0.235596	0.464724	3.17099	2.73877	3.8477	0.0132985	1.2734	2.47292	4.30242	0.701152	3.97482	3.64467	2.64769	3.12566	4.19222	2.27888	3.72863	2.29679	5.90286
3008	27	1	7.7	1	Normal Karyotype	3.25657	3.17019	2.57355	6.09165	3.06362	1.64349	3.28991	2.71428	5.37251	3.33183	4.30138	3.19043	3.83836	3.73675	3.29074	2.44289	0.207715	1.83095	0.171522	4.18738	3.88785	3.39047	3.70247	1.26027	4.15644	2.0619	0.234054	2.72685	2.36263	3.95803	0.185658	1.85181	3.01934	4.42711	2.46919	2.53037	4.42817	3.62091	3.46537	5.28558	2.15647	0.943391	0.562822	6.91578
3009	19	1	7.7	1	Normal Karyotype	3.59724	3.46909	2.52304	7.00016	3.30367	0.304987	3.53608	2.7293	6.02459	3.30093	4.47446	3.10383	3.79965	3.51113	4.01895	2.60607	1.0422	1.67093	0.092794	1.87869	3.8088	2.80871	3.64388	1.39822	3.90277	2.42065	0.902218	3.25948	3.13091	4.094	0.246493	1.49687	3.47804	4.36879	0.944255	3.43366	4.84737	3.38083	3.51318	4.76815	1.83688	1.27768	2.68487	5.65941
3011	81.9	0	81.9	0	Normal Karyotype	3.66365	3.56921	3.08033	7.30423	3.11852	0.336727	3.36307	3.36029	4.64605	3.02777	4.67878	3.60178	4.09707	3.76895	3.83446	2.35531	0.682139	1.90926	0.0510905	3.06384	4.11742	2.88211	4.24059	2.26171	3.95915	1.07957	0.56956	3.58144	3.33621	3.89215	0.289739	0.875831	3.72274	4.0923	0.337041	2.94755	3.68843	3.29524	3.11748	5.35626	1.41952	0.0782732	1.04638	5.7998
3012	86.6	0	86.6	0	PML-RARA	3.34954	3.16577	2.19371	6.3864	2.78727	2.54641	2.69974	2.42078	5.81644	2.43244	4.14411	0.946989	3.65386	3.37726	3.32661	2.09116	0.139043	1.74758	0.174834	2.72191	4.34829	3.3154	3.8986	1.05706	3.38459	0.344987	0.394692	2.69856	2.51305	3.83294	0.0255157	1.30042	3.04458	4.01073	0.296037	3.45606	3.86586	3.13079	3.04016	3.86248	1.92153	4.15597	1.70694	5.58528
[truncated: 23 more columns]

## Sheet: Supplementary Table 7
Supplementary Table 7. The result of the GSVA enrichment analysis between necroptosis cluster A and necroptosis cluster B.
id	logFC	AveExpr	t	P.Value	adj.P.Val	B
KEGG_OTHER_GLYCAN_DEGRADATION	0.483301	0.0237916	6.43595	3.00897e-09	5.5666e-07	10.8492
KEGG_LYSOSOME	0.363145	0.0384661	6.22132	8.41578e-09	7.7846e-07	9.8756
KEGG_PENTOSE_PHOSPHATE_PATHWAY	0.334683	0.0196379	6.09839	1.50613e-08	9.28781e-07	9.32506
KEGG_OXIDATIVE_PHOSPHORYLATION	0.356355	-0.0400088	5.78943	6.34814e-08	2.93602e-06	7.96564
KEGG_AMYOTROPHIC_LATERAL_SCLEROSIS_ALS	0.189252	0.00182309	5.23735	7.54371e-07	2.79117e-05	5.63316
KEGG_ALZHEIMERS_DISEASE	0.263477	-0.0219717	5.19313	9.14515e-07	2.81975e-05	5.45218
KEGG_DRUG_METABOLISM_OTHER_ENZYMES	0.19943	0.0356482	5.06143	1.61357e-06	4.26444e-05	4.91882
KEGG_HUNTINGTONS_DISEASE	0.255371	-0.0319701	4.74036	6.21742e-06	0.000143778	3.65485
KEGG_PARKINSONS_DISEASE	0.299831	-0.0473622	4.62462	9.98119e-06	0.000205169	3.21251
KEGG_VIBRIO_CHOLERAE_INFECTION	0.216425	0.0424889	4.44001	2.09227e-05	0.000387069	2.52234
KEGG_GLYCOSAMINOGLYCAN_DEGRADATION	0.305877	0.0359449	4.39258	2.52283e-05	0.000424294	2.34815
KEGG_REGULATION_OF_AUTOPHAGY	0.18576	0.0375286	4.26287	4.18136e-05	0.000644627	1.87855
KEGG_GALACTOSE_METABOLISM	0.23693	0.0358084	4.22881	4.7669e-05	0.000678366	1.75692
KEGG_GLYCOLYSIS_GLUCONEOGENESIS	0.19198	0.0138896	4.14653	6.52438e-05	0.00086215	1.46597
KEGG_PATHOGENIC_ESCHERICHIA_COLI_INFECTION	0.205579	0.0461286	4.11695	7.2966e-05	0.000899915	1.36238
KEGG_AMINO_SUGAR_AND_NUCLEOTIDE_SUGAR_METABOLISM	0.18255	0.00080728	4.06691	8.80621e-05	0.000986074	1.18838
KEGG_PROTEASOME	0.302098	-0.0052764	4.05928	9.06122e-05	0.000986074	1.16198
KEGG_SULFUR_METABOLISM	0.228677	-0.0854293	3.98397	0.000119866	0.00123196	0.903486
KEGG_PHENYLALANINE_METABOLISM	0.219488	-0.0156538	3.92227	0.000150361	0.00146404	0.694388
KEGG_HISTIDINE_METABOLISM	0.156346	-0.0564526	3.80052	0.000233554	0.00210935	0.289027
KEGG_ECM_RECEPTOR_INTERACTION	-0.176836	0.0245149	-3.79356	0.000239439	0.00210935	0.266155
KEGG_APOPTOSIS	0.166587	0.0205882	3.73356	0.000296369	0.00245137	0.0702941
KEGG_GLUTATHIONE_METABOLISM	0.191915	0.013525	3.72566	0.000304765	0.00245137	0.0446654
KEGG_PEROXISOME	0.171868	-0.0227969	3.68072	0.000356947	0.00275146	-0.100218
KEGG_CARDIAC_MUSCLE_CONTRACTION	0.169181	-0.00257236	3.62609	0.000431791	0.00319525	-0.274478
KEGG_PRIMARY_BILE_ACID_BIOSYNTHESIS	0.157166	0.00562763	3.50358	0.000657051	0.00467517	-0.657795
KEGG_O_GLYCAN_BIOSYNTHESIS	-0.133713	-0.00641048	-3.47795	0.000716468	0.00490913	-0.736657
KEGG_TASTE_TRANSDUCTION	-0.127777	-0.0123665	-3.41302	0.000890435	0.00588323	-0.934375
KEGG_EPITHELIAL_CELL_SIGNALING_IN_HELICOBACTER_PYLORI_INFECTION	0.159271	0.0516425	3.37645	0.00100514	0.00641213	-1.0444
KEGG_CITRATE_CYCLE_TCA_CYCLE	0.236677	0.0168884	3.3406	0.00113095	0.0069362	-1.15134
KEGG_FOLATE_BIOSYNTHESIS	0.185025	-0.0233628	3.32273	0.00119902	0.0069362	-1.20429
KEGG_VASOPRESSIN_REGULATED_WATER_REABSORPTION	0.148604	-0.0203152	3.32254	0.00119977	0.0069362	-1.20486
KEGG_PROTEIN_EXPORT	0.226331	-0.0584023	3.24593	0.00153759	0.0086198	-1.4292
KEGG_FRUCTOSE_AND_MANNOSE_METABOLISM	0.149765	0.0339395	3.12816	0.00223373	0.0121541	-1.76563
KEGG_SNARE_INTERACTIONS_IN_VESICULAR_TRANSPORT	0.148022	0.00589301	3.08346	0.00256739	0.0135705	-1.89061
KEGG_TGF_BETA_SIGNALING_PATHWAY	-0.105255	0.0086866	-3.06493	0.00271881	0.0136227	-1.94198
KEGG_NEUROTROPHIN_SIGNALING_PATHWAY	0.124245	0.0388817	3.05626	0.00279244	0.0136227	-1.96592
KEGG_FC_GAMMA_R_MEDIATED_PHAGOCYTOSIS	0.156222	0.0739675	3.05559	0.00279818	0.0136227	-1.96776
KEGG_STEROID_BIOSYNTHESIS	0.213364	-0.0457984	2.87519	0.00482011	0.0228646	-2.45275
KEGG_PANTOTHENATE_AND_COA_BIOSYNTHESIS	0.165849	0.068401	2.84498	0.00526764	0.0243628	-2.5315
KEGG_JAK_STAT_SIGNALING_PATHWAY	-0.106252	0.0540307	-2.8245	0.0055923	0.0252335	-2.58448
KEGG_PRIMARY_IMMUNODEFICIENCY	-0.182489	0.0303102	-2.76305	0.00667914	0.02942	-2.74142
KEGG_P53_SIGNALING_PATHWAY	0.126073	-0.025405	2.74384	0.00705649	0.0298652	-2.78987
KEGG_INSULIN_SIGNALING_PATHWAY	0.104928	0.0287856	2.73666	0.00720254	0.0298652	-2.80791
KEGG_TOLL_LIKE_RECEPTOR_SIGNALING_PATHWAY	0.14109	0.0796348	2.73365	0.0072645	0.0298652	-2.81546
KEGG_RENIN_ANGIOTENSIN_SYSTEM	0.118267	-0.00484855	2.66988	0.00869729	0.0349782	-2.97365
KEGG_PENTOSE_AND_GLUCURONATE_INTERCONVERSIONS	0.122579	0.0383442	2.57376	0.0113436	0.0436538	-3.20588
KEGG_RIBOFLAVIN_METABOLISM	-0.105764	-0.0243345	-2.56325	0.011673	0.0436538	-3.23082
KEGG_TERPENOID_BACKBONE_BIOSYNTHESIS	0.18267	-0.0169212	2.55932	0.0117983	0.0436538	-3.24012

## Sheet: Supplementary Table 8
Supplementary Table 8. The result of the GSVA enrichment analysis between necroptosis cluster A and necroptosis cluster C.
id	logFC	AveExpr	t	P.Value	adj.P.Val	B
KEGG_CHEMOKINE_SIGNALING_PATHWAY	-0.363387	-0.0728685	-9.26465	8.44308e-16	1.56197e-13	25.4404
KEGG_INTESTINAL_IMMUNE_NETWORK_FOR_IGA_PRODUCTION	-0.4962	-0.0416398	-8.76796	1.28284e-14	1.16824e-12	22.7932
KEGG_T_CELL_RECEPTOR_SIGNALING_PATHWAY	-0.331664	-0.0455619	-8.69636	1.89444e-14	1.16824e-12	22.414
KEGG_ALDOSTERONE_REGULATED_SODIUM_REABSORPTION	-0.324838	-0.0544134	-8.24257	2.20409e-13	8.39923e-12	20.0275
KEGG_SYSTEMIC_LUPUS_ERYTHEMATOSUS	-0.386516	-0.0673051	-8.23708	2.27006e-13	8.39923e-12	19.9988
KEGG_CELL_ADHESION_MOLECULES_CAMS	-0.328086	-0.0322631	-8.02761	6.9665e-13	2.14801e-11	18.9088
KEGG_JAK_STAT_SIGNALING_PATHWAY	-0.263322	-0.0109701	-7.93512	1.14006e-12	3.01301e-11	18.4301
KEGG_NATURAL_KILLER_CELL_MEDIATED_CYTOTOXICITY	-0.324076	-0.0545758	-7.8957	1.40564e-12	3.25055e-11	18.2267
KEGG_LEISHMANIA_INFECTION	-0.417566	-0.0921047	-7.82581	2.03612e-12	4.18537e-11	17.8666
KEGG_GRAFT_VERSUS_HOST_DISEASE	-0.495568	-0.0417815	-7.73687	3.25815e-12	6.02758e-11	17.4099
KEGG_REGULATION_OF_ACTIN_CYTOSKELETON	-0.252752	-0.0513127	-7.6858	4.26449e-12	6.7651e-11	17.1485
KEGG_CYTOKINE_CYTOKINE_RECEPTOR_INTERACTION	-0.30274	-0.0374412	-7.68037	4.38817e-12	6.7651e-11	17.1207
KEGG_LONG_TERM_POTENTIATION	-0.251587	-0.0454957	-7.62833	5.76934e-12	8.21021e-11	16.8549
KEGG_HEMATOPOIETIC_CELL_LINEAGE	-0.348853	-0.0280297	-7.55753	8.36351e-12	1.04177e-10	16.4944
KEGG_MELANOGENESIS	-0.254756	-0.0398179	-7.54345	9.00306e-12	1.04177e-10	16.4228
KEGG_WNT_SIGNALING_PATHWAY	-0.201805	-0.0406324	-7.54331	9.00988e-12	1.04177e-10	16.4221
KEGG_DORSO_VENTRAL_AXIS_FORMATION	-0.28124	-0.0521741	-7.46553	1.35261e-11	1.39832e-10	16.0276
KEGG_LEUKOCYTE_TRANSENDOTHELIAL_MIGRATION	-0.268913	-0.0672006	-7.46441	1.36053e-11	1.39832e-10	16.022
KEGG_VASCULAR_SMOOTH_MUSCLE_CONTRACTION	-0.234534	-0.0337827	-7.30608	3.09713e-11	3.01563e-10	15.2236
KEGG_FC_GAMMA_R_MEDIATED_PHAGOCYTOSIS	-0.314965	-0.0991016	-7.2117	5.04218e-11	4.66402e-10	14.7508
KEGG_MAPK_SIGNALING_PATHWAY	-0.205535	-0.0442008	-7.1936	5.53476e-11	4.87586e-10	14.6603
KEGG_B_CELL_RECEPTOR_SIGNALING_PATHWAY	-0.306289	-0.0782436	-7.17358	6.13482e-11	5.15883e-10	14.5605
KEGG_DILATED_CARDIOMYOPATHY	-0.250124	-0.0434318	-7.12028	8.06578e-11	6.3102e-10	14.2951
KEGG_ARRHYTHMOGENIC_RIGHT_VENTRICULAR_CARDIOMYOPATHY_ARVC	-0.261416	-0.0375684	-7.11739	8.18621e-11	6.3102e-10	14.2807
KEGG_HYPERTROPHIC_CARDIOMYOPATHY_HCM	-0.250354	-0.0419348	-7.09523	9.17068e-11	6.5806e-10	14.1706
KEGG_TGF_BETA_SIGNALING_PATHWAY	-0.224214	-0.0416867	-7.09358	9.2484e-11	6.5806e-10	14.1624
KEGG_ADHERENS_JUNCTION	-0.252736	-0.047126	-7.08291	9.7677e-11	6.69268e-10	14.1095
KEGG_TYPE_I_DIABETES_MELLITUS	-0.392601	-0.0508926	-7.01563	1.37729e-10	8.52613e-10	13.7763
KEGG_RENAL_CELL_CARCINOMA	-0.257584	-0.0553573	-7.01532	1.37946e-10	8.52613e-10	13.7748
KEGG_AUTOIMMUNE_THYROID_DISEASE	-0.385334	-0.000953684	-7.01487	1.38262e-10	8.52613e-10	13.7726
KEGG_AXON_GUIDANCE	-0.239929	-0.0330832	-6.99107	1.56082e-10	9.31456e-10	13.6551
KEGG_ALLOGRAFT_REJECTION	-0.448305	-0.0419135	-6.97516	1.69242e-10	9.78433e-10	13.5766
KEGG_FOCAL_ADHESION	-0.248051	-0.0422174	-6.95206	1.90326e-10	1.06698e-09	13.4628
KEGG_GAP_JUNCTION	-0.24131	-0.0363495	-6.94426	1.98023e-10	1.07748e-09	13.4244
KEGG_VIRAL_MYOCARDITIS	-0.314057	-0.0703174	-6.61527	1.03534e-09	5.47251e-09	11.8224
KEGG_TOLL_LIKE_RECEPTOR_SIGNALING_PATHWAY	-0.289579	-0.0786301	-6.58511	1.20277e-09	6.18092e-09	11.6773
KEGG_VEGF_SIGNALING_PATHWAY	-0.232584	-0.0529104	-6.55114	1.42359e-09	7.11796e-09	11.5142
KEGG_ANTIGEN_PROCESSING_AND_PRESENTATION	-0.328078	-0.0363395	-6.28069	5.36974e-09	2.61422e-08	10.2306
KEGG_CALCIUM_SIGNALING_PATHWAY	-0.157272	-0.0483751	-6.19807	8.01397e-09	3.8015e-08	9.84381
KEGG_PATHWAYS_IN_CANCER	-0.178559	-0.0370859	-6.16456	9.42071e-09	4.33182e-08	9.68765
KEGG_TYPE_II_DIABETES_MELLITUS	-0.207269	-0.04045	-6.16064	9.60024e-09	4.33182e-08	9.66942
KEGG_ENDOCYTOSIS	-0.222556	-0.0716181	-6.07485	1.44928e-08	6.38374e-08	9.27188
KEGG_NOD_LIKE_RECEPTOR_SIGNALING_PATHWAY	-0.26088	-0.0818796	-6.03567	1.74755e-08	7.51853e-08	9.09131
KEGG_ASTHMA	-0.401128	-0.0281848	-6.00525	2.02004e-08	8.49334e-08	8.95153
KEGG_COMPLEMENT_AND_COAGULATION_CASCADES	-0.218367	-0.0383786	-5.84715	4.26448e-08	1.75318e-07	8.23122
KEGG_ERBB_SIGNALING_PATHWAY	-0.18711	-0.0563198	-5.75362	6.603e-08	2.62887e-07	7.81013
KEGG_EPITHELIAL_CELL_SIGNALING_IN_HELICOBACTER_PYLORI_INFECTION	-0.2282	-0.0892552	-5.75117	6.67875e-08	2.62887e-07	7.79915
KEGG_LONG_TERM_DEPRESSION	-0.18892	-0.0297782	-5.70673	8.20977e-08	3.16418e-07	7.60047
KEGG_SPHINGOLIPID_METABOLISM	-0.233213	-0.0634633	-5.69171	8.80143e-08	3.32299e-07	7.5335
KEGG_FC_EPSILON_RI_SIGNALING_PATHWAY	-0.203481	-0.0703226	-5.66792	9.8247e-08	3.63514e-07	7.42767
KEGG_THYROID_CANCER	-0.213119	-0.0612663	-5.63396	1.14904e-07	4.16808e-07	7.27701
KEGG_NEUROTROPHIN_SIGNALING_PATHWAY	-0.198274	-0.0787818	-5.62228	1.21245e-07	4.31351e-07	7.22534
KEGG_GNRH_SIGNALING_PATHWAY	-0.17797	-0.0578588	-5.51592	1.97242e-07	6.88486e-07	6.75754
KEGG_PRION_DISEASES	-0.254421	-0.0714213	-5.43381	2.86177e-07	9.80421e-07	6.40005
KEGG_GLIOMA	-0.197889	-0.060071	-5.40835	3.20993e-07	1.07971e-06	6.28982
KEGG_PANTOTHENATE_AND_COA_BIOSYNTHESIS	-0.279443	-0.094316	-5.38426	3.57707e-07	1.18171e-06	6.18588
KEGG_GLYCOSPHINGOLIPID_BIOSYNTHESIS_GANGLIO_SERIES	-0.276624	-0.0232863	-5.33634	4.43381e-07	1.43905e-06	5.97986
KEGG_ADIPOCYTOKINE_SIGNALING_PATHWAY	-0.2253	-0.0526292	-5.33174	4.52586e-07	1.44359e-06	5.96015
KEGG_NEUROACTIVE_LIGAND_RECEPTOR_INTERACTION	-0.13693	-0.00874806	-5.32257	4.71497e-07	1.47842e-06	5.92089
KEGG_GLYCOSYLPHOSPHATIDYLINOSITOL_GPI_ANCHOR_BIOSYNTHESIS	0.268555	-0.0403214	5.29651	5.29539e-07	1.63275e-06	5.80955
KEGG_SMALL_CELL_LUNG_CANCER	-0.167525	-0.0359672	-5.27984	5.70297e-07	1.72959e-06	5.73845
KEGG_GLYCEROLIPID_METABOLISM	-0.187695	-0.0452326	-5.23976	6.81145e-07	2.03245e-06	5.5682
KEGG_TIGHT_JUNCTION	-0.161268	-0.0423138	-5.0915	1.3052e-06	3.83274e-06	4.94547
KEGG_ECM_RECEPTOR_INTERACTION	-0.234433	-0.00568499	-5.02751	1.72233e-06	4.97862e-06	4.68024
KEGG_PHOSPHATIDYLINOSITOL_SIGNALING_SYSTEM	-0.203582	-0.0490492	-5.00827	1.87133e-06	5.3261e-06	4.60092
KEGG_NOTCH_SIGNALING_PATHWAY	-0.228491	-0.0660102	-4.94187	2.4883e-06	6.88323e-06	4.32868
KEGG_PROSTATE_CANCER	-0.173943	-0.0530686	-4.94144	2.49284e-06	6.88323e-06	4.32693
KEGG_ENDOMETRIAL_CANCER	-0.19807	-0.0588766	-4.72281	6.26608e-06	1.70474e-05	3.44792
KEGG_PATHOGENIC_ESCHERICHIA_COLI_INFECTION	-0.213332	-0.104661	-4.68422	7.35348e-06	1.97159e-05	3.29559
KEGG_INSULIN_SIGNALING_PATHWAY	-0.162741	-0.0687834	-4.66657	7.90982e-06	2.09045e-05	3.22619
KEGG_RNA_POLYMERASE	0.254463	-0.0382669	4.49461	1.59502e-05	4.15603e-05	2.55978
KEGG_PRIMARY_IMMUNODEFICIENCY	-0.276279	-0.0139984	-4.38117	2.51028e-05	6.45004e-05	2.12989
KEGG_VIBRIO_CHOLERAE_INFECTION	-0.1867	-0.10176	-4.27436	3.82097e-05	9.68328e-05	1.73245
KEGG_AMINOACYL_TRNA_BIOSYNTHESIS	0.282806	-0.00513504	4.20521	4.9971e-05	0.000124928	1.479
KEGG_RIBOSOME	0.368524	-0.0242732	4.13967	6.42728e-05	0.00015854	1.24162
KEGG_OOCYTE_MEIOSIS	-0.153244	-0.0461038	-4.10479	7.34095e-05	0.000178694	1.11639
KEGG_FRUCTOSE_AND_MANNOSE_METABOLISM	-0.175749	-0.0836918	-4.06478	8.54177e-05	0.000205224	0.973763
KEGG_BASAL_CELL_CARCINOMA	-0.178488	-0.0229672	-4.04964	9.04341e-05	0.000214491	0.920071
KEGG_ACUTE_MYELOID_LEUKEMIA	-0.178377	-0.063122	-4.03379	9.59865e-05	0.000224778	0.86403
KEGG_COLORECTAL_CANCER	-0.125931	-0.0644907	-4.01949	0.000101277	0.000234202	0.813591
KEGG_SELENOAMINO_ACID_METABOLISM	0.197582	-0.0344905	3.9904	0.000112904	0.000257868	0.711457
KEGG_CHRONIC_MYELOID_LEUKEMIA	-0.160065	-0.0540645	-3.98038	0.000117199	0.000264413	0.676389
KEGG_BLADDER_CANCER	-0.168703	-0.0566205	-3.975	0.000119566	0.000266502	0.657614
KEGG_ABC_TRANSPORTERS	-0.180165	-0.0282374	-3.91103	0.000151478	0.000333613	0.435625
KEGG_PPAR_SIGNALING_PATHWAY	-0.139996	-0.0506429	-3.81579	0.000214391	0.000466616	0.110328
KEGG_CIRCADIAN_RHYTHM_MAMMAL	-0.200377	-0.0408861	-3.62717	0.000419176	0.000901716	-0.515182
KEGG_NON_SMALL_CELL_LUNG_CANCER	-0.145349	-0.0705053	-3.60071	0.000459656	0.00097743	-0.600917
KEGG_MTOR_SIGNALING_PATHWAY	-0.137007	-0.0395177	-3.45189	0.000765184	0.00160863	-1.07356
KEGG_PANCREATIC_CANCER	-0.128395	-0.0579063	-3.39556	0.000924357	0.00192142	-1.24822
KEGG_SULFUR_METABOLISM	0.180211	-0.093417	3.3891	0.000944455	0.00194138	-1.26808
KEGG_GLYCEROPHOSPHOLIPID_METABOLISM	-0.129742	-0.0546687	-3.35675	0.00105155	0.00213776	-1.36717
KEGG_TRYPTOPHAN_METABOLISM	-0.126046	-0.0617615	-3.26696	0.0014113	0.00281708	-1.638
KEGG_O_GLYCAN_BIOSYNTHESIS	-0.119124	-0.00700083	-3.26314	0.00142888	0.00281708	-1.64937
KEGG_APOPTOSIS	-0.131525	-0.0857824	-3.2626	0.00143138	0.00281708	-1.65098
KEGG_RNA_DEGRADATION	0.164477	-0.032392	3.2408	0.00153598	0.00299113	-1.71574
KEGG_ALANINE_ASPARTATE_AND_GLUTAMATE_METABOLISM	0.139367	-0.0415729	3.2287	0.00159705	0.00307765	-1.75152
KEGG_HEDGEHOG_SIGNALING_PATHWAY	-0.118397	-0.0247531	-3.22035	0.0016405	0.00312879	-1.77614
KEGG_MELANOMA	-0.103702	-0.0289985	-3.18571	0.00183287	0.00346	-1.87775
KEGG_PROGESTERONE_MEDIATED_OOCYTE_MATURATION	-0.108902	-0.0482135	-3.14485	0.00208669	0.00389936	-1.99642
KEGG_PROXIMAL_TUBULE_BICARBONATE_RECLAMATION	-0.123476	-0.0268209	-2.81694	0.00565533	0.0104624	-2.90084
KEGG_LYSOSOME	-0.143185	-0.138497	-2.69728	0.00797851	0.0144708	-3.20923
KEGG_ARACHIDONIC_ACID_METABOLISM	-0.100518	-0.0327521	-2.67972	0.00838422	0.015059	-3.25348
KEGG_PYRIMIDINE_METABOLISM	0.127773	-0.0621671	2.62117	0.0098755	0.017567	-3.39919
KEGG_GALACTOSE_METABOLISM	-0.129964	-0.0936316	-2.57424	0.0112394	0.0198028	-3.51392
KEGG_SNARE_INTERACTIONS_IN_VESICULAR_TRANSPORT	-0.105118	-0.0841281	-2.50883	0.0134226	0.0234262	-3.67072
KEGG_BUTANOATE_METABOLISM	0.107621	-0.0392608	2.49764	0.0138318	0.0239148	-3.69717
KEGG_BIOSYNTHESIS_OF_UNSATURATED_FATTY_ACIDS	-0.14561	-0.0427548	-2.40772	0.0175471	0.0297818	-3.90591
KEGG_INOSITOL_PHOSPHATE_METABOLISM	-0.104032	-0.0571086	-2.36444	0.019633	0.0330191	-4.00391
KEGG_GLYCOSAMINOGLYCAN_BIOSYNTHESIS_KERATAN_SULFATE	-0.12495	-0.0444962	-2.2171	0.0284653	0.0470185	-4.3253

## Sheet: Supplementary Table 9
Supplementary Table 9. The result of the GSVA enrichment analysis between m6A between necroptosis cluster B and necroptosis cluster C.
id	logFC	AveExpr	t	P.Value	adj.P.Val	B
KEGG_FC_GAMMA_R_MEDIATED_PHAGOCYTOSIS	-0.471187	-0.0815238	-9.41009	6.54513e-15	1.21085e-12	23.5301
KEGG_LEISHMANIA_INFECTION	-0.530707	-0.111088	-9.21544	1.63802e-14	1.51517e-12	22.6375
KEGG_TOLL_LIKE_RECEPTOR_SIGNALING_PATHWAY	-0.430669	-0.0636124	-8.78434	1.24959e-13	5.52701e-12	20.66
KEGG_CHEMOKINE_SIGNALING_PATHWAY	-0.400495	-0.116998	-8.75098	1.46225e-13	5.52701e-12	20.5071
KEGG_LYSOSOME	-0.50633	0.000950171	-8.74645	1.49379e-13	5.52701e-12	20.4863
KEGG_EPITHELIAL_CELL_SIGNALING_IN_HELICOBACTER_PYLORI_INFECTION	-0.387471	-0.0557821	-8.46725	5.55851e-13	1.71388e-11	19.2075
KEGG_SYSTEMIC_LUPUS_ERYTHEMATOSUS	-0.439858	-0.108	-8.26073	1.46645e-12	3.87562e-11	18.2634
KEGG_VIBRIO_CHOLERAE_INFECTION	-0.403125	-0.0356209	-8.13008	2.70587e-12	6.25731e-11	17.6673
KEGG_NOD_LIKE_RECEPTOR_SIGNALING_PATHWAY	-0.378898	-0.0724404	-7.69417	2.07087e-11	4.25679e-10	15.6876
KEGG_PATHOGENIC_ESCHERICHIA_COLI_INFECTION	-0.418911	-0.0478601	-7.53875	4.26101e-11	7.88287e-10	14.986
KEGG_B_CELL_RECEPTOR_SIGNALING_PATHWAY	-0.369553	-0.101045	-7.3915	8.42057e-11	1.41619e-09	14.3238
KEGG_NATURAL_KILLER_CELL_MEDIATED_CYTOTOXICITY	-0.352779	-0.0959072	-7.30743	1.24089e-10	1.75314e-09	13.947
KEGG_NEUROTROPHIN_SIGNALING_PATHWAY	-0.322519	-0.0560611	-7.29467	1.31603e-10	1.75314e-09	13.8899
KEGG_PANTOTHENATE_AND_COA_BIOSYNTHESIS	-0.445292	-0.0664601	-7.29292	1.3267e-10	1.75314e-09	13.882
KEGG_LEUKOCYTE_TRANSENDOTHELIAL_MIGRATION	-0.320305	-0.089088	-7.12412	2.88071e-10	3.55287e-09	13.1287
KEGG_INTESTINAL_IMMUNE_NETWORK_FOR_IGA_PRODUCTION	-0.430012	-0.154484	-6.81597	1.17337e-09	1.3567e-08	11.7652
KEGG_OTHER_GLYCAN_DEGRADATION	-0.490615	0.0746482	-6.65709	2.40514e-09	2.61735e-08	11.0689
KEGG_AMYOTROPHIC_LATERAL_SCLEROSIS_ALS	-0.257165	-0.0140388	-6.54571	3.96659e-09	4.07677e-08	10.5837
KEGG_PENTOSE_PHOSPHATE_PATHWAY	-0.404163	0.0194275	-6.49104	5.06598e-09	4.93266e-08	10.3466
KEGG_VIRAL_MYOCARDITIS	-0.370606	-0.097441	-6.45064	6.06738e-09	5.61232e-08	10.1718
KEGG_FC_EPSILON_RI_SIGNALING_PATHWAY	-0.293801	-0.06374	-6.35511	9.2816e-09	7.87967e-08	9.75996
KEGG_ALDOSTERONE_REGULATED_SODIUM_REABSORPTION	-0.296331	-0.121617	-6.35297	9.37042e-09	7.87967e-08	9.75073
KEGG_REGULATION_OF_ACTIN_CYTOSKELETON	-0.272371	-0.0847925	-6.25968	1.41637e-08	1.13925e-07	9.35068
KEGG_ENDOCYTOSIS	-0.282866	-0.0817324	-6.24589	1.50529e-08	1.16033e-07	9.29174
KEGG_APOPTOSIS	-0.298112	-0.0328345	-6.19476	1.88584e-08	1.39552e-07	9.07358
KEGG_INSULIN_SIGNALING_PATHWAY	-0.267669	-0.0488072	-6.09123	2.97071e-08	2.11377e-07	8.63391
KEGG_SPHINGOLIPID_METABOLISM	-0.266075	-0.0877132	-6.05407	3.49481e-08	2.36318e-07	8.47677
KEGG_CYTOKINE_CYTOKINE_RECEPTOR_INTERACTION	-0.268106	-0.103702	-6.04876	3.5767e-08	2.36318e-07	8.45438
KEGG_GALACTOSE_METABOLISM	-0.366894	-0.0087682	-6.02979	3.88533e-08	2.47857e-07	8.37434
KEGG_TYPE_I_DIABETES_MELLITUS	-0.400454	-0.113077	-6.01162	4.20552e-08	2.54942e-07	8.29778
KEGG_FRUCTOSE_AND_MANNOSE_METABOLISM	-0.325514	-0.0457166	-6.00802	4.272e-08	2.54942e-07	8.28262
KEGG_ADIPOCYTOKINE_SIGNALING_PATHWAY	-0.290773	-0.0608793	-5.96898	5.06273e-08	2.92689e-07	8.11846
KEGG_CALCIUM_SIGNALING_PATHWAY	-0.193257	-0.0585077	-5.86672	7.88299e-08	4.41925e-07	7.69062
KEGG_T_CELL_RECEPTOR_SIGNALING_PATHWAY	-0.257779	-0.134328	-5.76122	1.24099e-07	6.75243e-07	7.25247
KEGG_LONG_TERM_POTENTIATION	-0.24837	-0.0890565	-5.70434	1.58278e-07	8.3661e-07	7.01772
KEGG_COMPLEMENT_AND_COAGULATION_CASCADES	-0.217527	-0.0753094	-5.62239	2.24345e-07	1.15288e-06	6.68128
KEGG_PRION_DISEASES	-0.334255	-0.0780838	-5.58286	2.65251e-07	1.32626e-06	6.51981
KEGG_GRAFT_VERSUS_HOST_DISEASE	-0.415085	-0.160952	-5.56317	2.88282e-07	1.40348e-06	6.43956
KEGG_RENAL_CELL_CARCINOMA	-0.251334	-0.101287	-5.52705	3.35736e-07	1.59259e-06	6.29273
KEGG_ANTIGEN_PROCESSING_AND_PRESENTATION	-0.335454	-0.0879377	-5.48087	4.07714e-07	1.88568e-06	6.10563
KEGG_MELANOGENESIS	-0.233219	-0.092153	-5.46313	4.39232e-07	1.9819e-06	6.03392
KEGG_ALLOGRAFT_REJECTION	-0.405459	-0.136237	-5.37195	6.4284e-07	2.83156e-06	5.66733
KEGG_GLYCOLYSIS_GLUCONEOGENESIS	-0.278364	-0.0118217	-5.35569	6.87824e-07	2.95924e-06	5.60226
KEGG_GLIOMA	-0.246515	-0.0713141	-5.31656	8.09086e-07	3.40184e-06	5.44609
KEGG_CELL_ADHESION_MOLECULES_CAMS	-0.256614	-0.119344	-5.30626	8.44341e-07	3.47118e-06	5.40507
KEGG_TYPE_II_DIABETES_MELLITUS	-0.216469	-0.0710048	-5.29277	8.92792e-07	3.59058e-06	5.35143
KEGG_GNRH_SIGNALING_PATHWAY	-0.221964	-0.0678519	-5.28693	9.14613e-07	3.60007e-06	5.32821
KEGG_MAPK_SIGNALING_PATHWAY	-0.184789	-0.0879414	-5.21079	1.25148e-06	4.82342e-06	5.02686
KEGG_ERBB_SIGNALING_PATHWAY	-0.206992	-0.0786936	-5.12893	1.74912e-06	6.54663e-06	4.70539
KEGG_DORSO_VENTRAL_AXIS_FORMATION	-0.23796	-0.118727	-5.12458	1.7804e-06	6.54663e-06	4.68838
KEGG_SNARE_INTERACTIONS_IN_VESICULAR_TRANSPORT	-0.253141	-0.0351139	-5.12124	1.80475e-06	6.54663e-06	4.67535
KEGG_VEGF_SIGNALING_PATHWAY	-0.226998	-0.0943567	-5.10879	1.89855e-06	6.75444e-06	4.62673
KEGG_PPAR_SIGNALING_PATHWAY	-0.211011	-0.0421204	-4.93238	3.86736e-06	1.34993e-05	3.94467
KEGG_TRYPTOPHAN_METABOLISM	-0.22435	-0.038624	-4.88447	4.68176e-06	1.60394e-05	3.76172
KEGG_NON_SMALL_CELL_LUNG_CANCER	-0.232311	-0.0557026	-4.75169	7.91181e-06	2.66125e-05	3.25999
KEGG_ASTHMA	-0.361259	-0.113271	-4.7237	8.82874e-06	2.91664e-05	3.15525
KEGG_THYROID_CANCER	-0.209797	-0.0984354	-4.68604	1.02271e-05	3.31273e-05	3.01487
KEGG_NOTCH_SIGNALING_PATHWAY	-0.274129	-0.0837207	-4.68208	1.03859e-05	3.31273e-05	3.00017
KEGG_AMINO_SUGAR_AND_NUCLEOTIDE_SUGAR_METABOLISM	-0.247949	-0.0144328	-4.63646	1.23995e-05	3.88797e-05	2.83108
KEGG_GLUTATHIONE_METABOLISM	-0.258491	-0.00129976	-4.61659	1.33902e-05	4.12865e-05	2.75777
KEGG_GLYCEROLIPID_METABOLISM	-0.224804	-0.0599521	-4.57941	1.54548e-05	4.68711e-05	2.62108
KEGG_ENDOMETRIAL_CANCER	-0.226863	-0.0790747	-4.50881	2.02573e-05	6.04451e-05	2.36334
KEGG_AUTOIMMUNE_THYROID_DISEASE	-0.308324	-0.10011	-4.50277	2.07288e-05	6.08703e-05	2.34144
KEGG_GAP_JUNCTION	-0.196422	-0.0969421	-4.37289	3.38839e-05	9.79456e-05	1.87418
KEGG_PRIMARY_BILE_ACID_BIOSYNTHESIS	-0.217531	-0.00972676	-4.36086	3.54466e-05	0.000100887	1.83136
KEGG_WNT_SIGNALING_PATHWAY	-0.144582	-0.100164	-4.33922	3.84362e-05	0.000107738	1.75449
KEGG_DILATED_CARDIOMYOPATHY	-0.195253	-0.109993	-4.32564	4.04351e-05	0.000111649	1.70637
KEGG_GLYCOSAMINOGLYCAN_DEGRADATION	-0.338869	0.0525317	-4.30442	4.37613e-05	0.000119056	1.63137
KEGG_FOCAL_ADHESION	-0.189814	-0.109946	-4.25785	5.20103e-05	0.000139448	1.46762
KEGG_HYPERTROPHIC_CARDIOMYOPATHY_HCM	-0.190434	-0.110806	-4.22834	5.79931e-05	0.000153267	1.36446
KEGG_ADHERENS_JUNCTION	-0.185627	-0.119631	-4.19663	6.51605e-05	0.000169784	1.25411
KEGG_COLORECTAL_CANCER	-0.149917	-0.074777	-4.18054	6.91147e-05	0.000177586	1.19835
KEGG_ARRHYTHMOGENIC_RIGHT_VENTRICULAR_CARDIOMYOPATHY_ARVC	-0.199647	-0.109123	-4.17605	7.02599e-05	0.000178056	1.1828
KEGG_PROSTATE_CANCER	-0.176305	-0.0811223	-4.17197	7.13145e-05	0.000178286	1.1687
KEGG_AXON_GUIDANCE	-0.178168	-0.101037	-4.16321	7.36338e-05	0.00018163	1.13842
KEGG_HEMATOPOIETIC_CELL_LINEAGE	-0.233787	-0.138204	-4.1434	7.91463e-05	0.000192659	1.07014
KEGG_VASCULAR_SMOOTH_MUSCLE_CONTRACTION	-0.162716	-0.10536	-4.13095	8.28114e-05	0.000197817	1.02734
KEGG_DRUG_METABOLISM_OTHER_ENZYMES	-0.179778	0.0691027	-4.12899	8.34041e-05	0.000197817	1.02059
KEGG_PHOSPHATIDYLINOSITOL_SIGNALING_SYSTEM	-0.210317	-0.0800961	-4.12262	8.53569e-05	0.000199887	0.998717
KEGG_REGULATION_OF_AUTOPHAGY	-0.182018	0.0606798	-4.09551	9.41625e-05	0.000217751	0.905941
KEGG_ALZHEIMERS_DISEASE	-0.239603	0.0210774	-4.05284	0.000109816	0.000250815	0.760728
KEGG_ACUTE_MYELOID_LEUKEMIA	-0.211061	-0.0782732	-4.02852	0.000119827	0.000270341	0.678415
KEGG_PHENYLALANINE_METABOLISM	-0.2279	0.0046424	-3.9337	0.000167859	0.000368625	0.360793
KEGG_VASOPRESSIN_REGULATED_WATER_REABSORPTION	-0.193348	-0.0280502	-3.93368	0.000167876	0.000368625	0.360701
KEGG_JAK_STAT_SIGNALING_PATHWAY	-0.15707	-0.102861	-3.93117	0.000169368	0.000368625	0.352371
KEGG_PROTEASOME	-0.335277	0.0107784	-3.90834	0.000183549	0.000393402	0.276713
KEGG_BLADDER_CANCER	-0.201399	-0.070147	-3.90609	0.000185005	0.000393402	0.269281
KEGG_GLYCEROPHOSPHOLIPID_METABOLISM	-0.178034	-0.0546546	-3.88505	0.000199187	0.000418746	0.199825
KEGG_CITRATE_CYCLE_TCA_CYCLE	-0.303539	0.00698956	-3.86411	0.000214324	0.000445504	0.130985
KEGG_CARDIAC_MUSCLE_CONTRACTION	-0.214841	-0.00847437	-3.83925	0.000233723	0.00048043	0.0495936
KEGG_PATHWAYS_IN_CANCER	-0.12802	-0.0897175	-3.73099	0.000339497	0.000690187	-0.300484
KEGG_GLYCOSPHINGOLIPID_BIOSYNTHESIS_GANGLIO_SERIES	-0.256644	-0.0785815	-3.71371	0.000360122	0.000724159	-0.355694
KEGG_P53_SIGNALING_PATHWAY	-0.184436	-0.0431893	-3.68578	0.000395997	0.000787737	-0.444536
KEGG_BETA_ALANINE_METABOLISM	-0.16632	-0.0515905	-3.61148	0.00050873	0.00100122	-0.67855
KEGG_NEUROACTIVE_LIGAND_RECEPTOR_INTERACTION	-0.116857	-0.0407017	-3.5293	0.000668616	0.00128037	-0.933245
KEGG_TIGHT_JUNCTION	-0.142922	-0.0775645	-3.52887	0.000669558	0.00128037	-0.934555
KEGG_LONG_TERM_DEPRESSION	-0.153748	-0.077229	-3.52807	0.000671331	0.00128037	-0.937017
KEGG_CHRONIC_MYELOID_LEUKEMIA	-0.17008	-0.076351	-3.41221	0.000980151	0.00185028	-1.28857
KEGG_NICOTINATE_AND_NICOTINAMIDE_METABOLISM	-0.154246	-0.0154817	-3.34348	0.00122216	0.00228384	-1.4929
KEGG_OXIDATIVE_PHOSPHORYLATION	-0.243488	0.0625326	-3.33657	0.00124938	0.00231136	-1.51327
KEGG_CYTOSOLIC_DNA_SENSING_PATHWAY	-0.155661	-0.00781888	-3.25261	0.00162886	0.00298356	-1.7581
KEGG_RIG_I_LIKE_RECEPTOR_SIGNALING_PATHWAY	-0.157165	-0.017817	-3.20277	0.00190266	0.00345091	-1.90115
KEGG_OOCYTE_MEIOSIS	-0.14783	-0.0741918	-3.18599	0.00200413	0.00359966	-1.94892
KEGG_TGF_BETA_SIGNALING_PATHWAY	-0.118959	-0.126583	-3.1804	0.00203902	0.0036271	-1.96478
KEGG_PANCREATIC_CANCER	-0.148394	-0.0703993	-3.17612	0.00206614	0.00364035	-1.97692
KEGG_HUNTINGTONS_DISEASE	-0.196584	0.0293603	-3.08375	0.00273987	0.00478184	-2.23569
KEGG_PROGESTERONE_MEDIATED_OOCYTE_MATURATION	-0.134483	-0.0549314	-3.01312	0.0033871	0.0058562	-2.42941
KEGG_PEROXISOME	-0.159915	0.00329338	-2.9393	0.00421274	0.00721626	-2.62799
KEGG_AMINOACYL_TRNA_BIOSYNTHESIS	0.256822	0.0538967	2.92843	0.00434895	0.00738125	-2.6569
KEGG_ARACHIDONIC_ACID_METABOLISM	-0.119678	-0.0409557	-2.7076	0.00815917	0.0136065	-3.22486
KEGG_LINOLEIC_ACID_METABOLISM	0.120129	-0.0154841	2.70739	0.0081639	0.0136065	-3.22538
KEGG_LIMONENE_AND_PINENE_DEGRADATION	-0.196947	-0.0154588	-2.67355	0.00896374	0.0148062	-3.30911
KEGG_INOSITOL_PHOSPHATE_METABOLISM	-0.142421	-0.0572474	-2.66755	0.00911282	0.0149192	-3.32387
KEGG_TAURINE_AND_HYPOTAURINE_METABOLISM	-0.153755	-0.0249012	-2.60593	0.0107789	0.0174922	-3.47376
KEGG_SELENOAMINO_ACID_METABOLISM	0.156903	0.0168884	2.59678	0.0110487	0.017774	-3.49577
KEGG_MTOR_SIGNALING_PATHWAY	-0.133256	-0.0641394	-2.56701	0.0119687	0.019088	-3.5669
KEGG_PYRUVATE_METABOLISM	-0.144237	-0.0251181	-2.49216	0.0145944	0.0230766	-3.74263
KEGG_TERPENOID_BACKBONE_BIOSYNTHESIS	-0.180644	0.00493512	-2.3486	0.0211129	0.0331008	-4.067
KEGG_PARKINSONS_DISEASE	-0.177994	0.0536944	-2.3083	0.023356	0.0360071	-4.15501
KEGG_RNA_POLYMERASE	0.169032	0.0427719	2.2938	0.0242136	0.0370208	-4.18636

## Sheet: Supplementary Table 10
Supplementary Table 10. GO functional enrichment analyses of differentially expressed genes (DEGs).
ONTOLOGY	ID	Description	GeneRatio	BgRatio	pvalue	p.adjust	qvalue	geneID	Count
BP	GO:0002283	neutrophil activation involved in immune response	72/558	488/18862	3.65731e-30	1.58764e-26	1.36899e-26	CAT/PTAFR/HK3/SIRPA/CD68/ITGAX/MVP/CDA/CTSZ/FCER1G/ITGAM/OSTF1/STXBP2/HEXB/GNS/GYG1/FGR/GM2A/GRN/LILRA2/CFP/ITGB2/CTSB/ORMDL3/DBNL/PKM/SIRPB1/TOM1/LGALS3/QPCT/RAB5C/SLCO4C1/RAB24/ATP6AP2/LILRB2/BST1/LYZ/CD93/S100A11/CPPED1/SIGLEC9/TCIRG1/PSAP/FGL2/TLR2/CAP1/NFAM1/CD53/HVCN1/SLC11A1/CEP290/GAA/MCEMP1/C5AR1/SYK/B4GALT1/DEGS1/BIN2/DNAJC5/TOLLIP/CTSH/SERPINA1/ERP44/PLEKHO2/FPR2/A1BG/ADA2/ANXA2/CRISPL…	72
BP	GO:0043312	neutrophil degranulation	71/558	485/18862	1.57016e-29	2.54886e-26	2.19783e-26	CAT/PTAFR/HK3/SIRPA/CD68/ITGAX/MVP/CDA/CTSZ/FCER1G/ITGAM/OSTF1/STXBP2/HEXB/GNS/GYG1/FGR/GM2A/GRN/CFP/ITGB2/CTSB/ORMDL3/DBNL/PKM/SIRPB1/TOM1/LGALS3/QPCT/RAB5C/SLCO4C1/RAB24/ATP6AP2/LILRB2/BST1/LYZ/CD93/S100A11/CPPED1/SIGLEC9/TCIRG1/PSAP/FGL2/TLR2/CAP1/NFAM1/CD53/HVCN1/SLC11A1/CEP290/GAA/MCEMP1/C5AR1/SYK/B4GALT1/DEGS1/BIN2/DNAJC5/TOLLIP/CTSH/SERPINA1/ERP44/PLEKHO2/FPR2/A1BG/ADA2/ANXA2/CRISPLD2/HPSE…	71
BP	GO:0042119	neutrophil activation	72/558	500/18862	1.76148e-29	2.54886e-26	2.19783e-26	CAT/PTAFR/HK3/SIRPA/CD68/ITGAX/MVP/CDA/CTSZ/FCER1G/ITGAM/OSTF1/STXBP2/HEXB/GNS/GYG1/FGR/GM2A/GRN/LILRA2/CFP/ITGB2/CTSB/ORMDL3/DBNL/PKM/SIRPB1/TOM1/LGALS3/QPCT/RAB5C/SLCO4C1/RAB24/ATP6AP2/LILRB2/BST1/LYZ/CD93/S100A11/CPPED1/SIGLEC9/TCIRG1/PSAP/FGL2/TLR2/CAP1/NFAM1/CD53/HVCN1/SLC11A1/CEP290/GAA/MCEMP1/C5AR1/SYK/B4GALT1/DEGS1/BIN2/DNAJC5/TOLLIP/CTSH/SERPINA1/ERP44/PLEKHO2/FPR2/A1BG/ADA2/ANXA2/CRISPL…	72
BP	GO:0002446	neutrophil mediated immunity	71/558	499/18862	9.59309e-29	1.04109e-25	8.97711e-26	CAT/PTAFR/HK3/SIRPA/CD68/ITGAX/MVP/CDA/CTSZ/FCER1G/ITGAM/OSTF1/STXBP2/HEXB/GNS/GYG1/FGR/GM2A/GRN/CFP/ITGB2/CTSB/ORMDL3/DBNL/PKM/SIRPB1/TOM1/LGALS3/QPCT/RAB5C/SLCO4C1/RAB24/ATP6AP2/LILRB2/BST1/LYZ/CD93/S100A11/CPPED1/SIGLEC9/TCIRG1/PSAP/FGL2/TLR2/CAP1/NFAM1/CD53/HVCN1/SLC11A1/CEP290/GAA/MCEMP1/C5AR1/SYK/B4GALT1/DEGS1/BIN2/DNAJC5/TOLLIP/CTSH/SERPINA1/ERP44/PLEKHO2/FPR2/A1BG/ADA2/ANXA2/CRISPLD2/HPSE…	71
BP	GO:0001819	positive regulation of cytokine production	42/558	437/18862	1.97902e-11	1.71818e-08	1.48156e-08	APP/CD34/F2R/PTAFR/IFNGR1/TLR4/SIGLEC16/FCER1G/P2RX7/FGR/CASP1/LILRA2/SCIMP/CD86/IL6ST/CEBPB/ATP6AP2/LILRB2/TLR8/APOA2/C1QTNF3/NLRP12/CCDC88B/CD4/AKIRIN2/HMOX1/TLR2/NFAM1/IL17RA/SLC11A1/LAPTM5/C5AR1/NOD2/SYK/POLR3G/NLRP3/TLR5/GPSM3/NLRC4/CD40/MYD88/HPSE	42
BP	GO:0042110	T cell activation	38/558	474/18862	2.85788e-08	1.87936e-05	1.62054e-05	VSIR/EFNB1/NKX2-3/SIRPA/LGALS1/FCER1G/CTSL/LCP1/CD1D/MAFB/CD86/IL6ST/SLA2/SIRPB1/LGALS3/LILRB4/CEBPB/LFNG/SOX4/PATZ1/LILRB2/WAS/KIF13B/CCDC88B/TCIRG1/CD4/FGL2/RIPOR2/SLC11A1/LAPTM5/PRELID1/NOD2/ZBTB7B/SYK/NLRP3/CCND3/SOX12/PSMB10	38
BP	GO:0032755	positive regulation of interleukin-6 production	15/558	86/18862	3.03053e-08	1.87936e-05	1.62054e-05	APP/F2R/PTAFR/TLR4/SIGLEC16/LILRA2/SCIMP/LILRB2/TLR8/AKIRIN2/TLR2/IL17RA/NOD2/SYK/MYD88	15
BP	GO:0032675	regulation of interleukin-6 production	20/558	158/18862	4.65152e-08	2.52403e-05	2.17642e-05	APP/F2R/PTAFR/SIRPA/TLR4/SIGLEC16/LILRA2/SCIMP/LILRB4/CEBPB/LILRB2/TLR8/C1QTNF3/NLRP12/AKIRIN2/TLR2/IL17RA/NOD2/SYK/MYD88	20
BP	GO:0032651	regulation of interleukin-1 beta production	16/558	103/18862	5.78428e-08	2.78995e-05	2.40572e-05	APP/F2R/SIRPA/TLR4/CX3CR1/P2RX7/CASP1/LILRA2/LILRB4/MEFV/TLR8/NLRP12/CARD16/NOD2/NLRP3/NLRC4	16
BP	GO:0032635	interleukin-6 production	20/558	162/18862	7.09716e-08	3.08088e-05	2.65658e-05	APP/F2R/PTAFR/SIRPA/TLR4/SIGLEC16/LILRA2/SCIMP/LILRB4/CEBPB/LILRB2/TLR8/C1QTNF3/NLRP12/AKIRIN2/TLR2/IL17RA/NOD2/SYK/MYD88	20
BP	GO:0032611	interleukin-1 beta production	16/558	108/18862	1.14388e-07	4.35845e-05	3.75821e-05	APP/F2R/SIRPA/TLR4/CX3CR1/P2RX7/CASP1/LILRA2/LILRB4/MEFV/TLR8/NLRP12/CARD16/NOD2/NLRP3/NLRC4	16
BP	GO:0071216	cellular response to biotic stimulus	24/558	233/18862	1.20483e-07	4.35845e-05	3.75821e-05	PTAFR/SIRPA/CD68/TLR4/CX3CR1/HCK/CASP1/LILRA2/SCIMP/CD86/LY86/TIGAR/CEBPB/LILRB2/TRIB1/CARD16/TLR2/NOD2/SYK/NLRP3/SIRT2/CD40/MYD88/CD180	24
BP	GO:0071219	cellular response to molecule of bacterial origin	22/558	209/18862	2.77291e-07	9.25937e-05	7.98417e-05	PTAFR/SIRPA/CD68/TLR4/CX3CR1/HCK/CASP1/LILRA2/SCIMP/CD86/LY86/CEBPB/LILRB2/TRIB1/CARD16/TLR2/NOD2/NLRP3/SIRT2/CD40/MYD88/CD180	22
BP	GO:0071222	cellular response to lipopolysaccharide	21/558	197/18862	4.18463e-07	0.000129631	0.000111778	PTAFR/SIRPA/CD68/TLR4/CX3CR1/HCK/CASP1/LILRA2/SCIMP/CD86/LY86/CEBPB/LILRB2/TRIB1/CARD16/TLR2/NOD2/NLRP3/CD40/MYD88/CD180	21
BP	GO:0032652	regulation of interleukin-1 production	16/558	119/18862	4.47929e-07	0.000129631	0.000111778	APP/F2R/SIRPA/TLR4/CX3CR1/P2RX7/CASP1/LILRA2/LILRB4/MEFV/TLR8/NLRP12/CARD16/NOD2/NLRP3/NLRC4	16
BP	GO:0050764	regulation of phagocytosis	14/558	94/18862	6.62298e-07	0.00017969	0.000154943	ATG3/SIRPA/FCER1G/HCK/FGR/SIRPB1/APOA2/CD300LF/TLR2/ABCA7/SLC11A1/NOD2/SYK/FPR2	14
BP	GO:0031663	lipopolysaccharide-mediated signaling pathway	11/558	58/18862	8.88658e-07	0.000224376	0.000193475	PTAFR/TLR4/HCK/LILRA2/SCIMP/LY86/TRIB1/CARD16/TLR2/MYD88/CD180	11
BP	GO:0002224	toll-like receptor signaling pathway	18/558	157/18862	9.65845e-07	0.000224376	0.000193475	WDFY1/TLR4/ITGAM/CTSL/LILRA2/SCIMP/ITGB2/CTSB/TLR8/CD300LF/TLR2/UNC93B1/UBC/NOD2/TLR5/UBE2D1/CD40/MYD88	18
BP	GO:0032612	interleukin-1 production	16/558	126/18862	9.82063e-07	0.000224376	0.000193475	APP/F2R/SIRPA/TLR4/CX3CR1/P2RX7/CASP1/LILRA2/LILRB4/MEFV/TLR8/NLRP12/CARD16/NOD2/NLRP3/NLRC4	16
BP	GO:0042116	macrophage activation	14/558	102/18862	1.81926e-06	0.00039487	0.000340488	APP/IFNGR1/TLR4/ITGAM/GRN/ITGB2/IL31RA/TLR8/CD93/TLR2/SLC11A1/C5AR1/SYK/FPR2	14
BP	GO:0032642	regulation of chemokine production	13/558	89/18862	2.07737e-06	0.000429423	0.000370283	APP/SIRPA/TLR4/LILRB4/MEFV/C1QTNF3/HMOX1/TLR2/IL17RA/NOD2/KLF4/SYK/MYD88	13
BP	GO:0007035	vacuolar acidification	7/558	23/18862	3.10008e-06	0.000611701	0.000527458	CLIC4/ATP6V0D1/GRN/ATP6AP2/TCIRG1/PPT1/SLC11A1	7
BP	GO:0007249	I-kappaB kinase/NF-kappaB signaling	24/558	282/18862	3.79925e-06	0.000717067	0.000618313	F2R/SIRPA/LGALS1/TLR4/CX3CR1/S100A4/CASP1/ATP2C1/LILRB4/TLR8/NLRP12/TNFSF10/IRAK1BP1/CARD16/CD4/HMOX1/TLR2/UBC/NOD2/TNFRSF10B/NKIRAS1/TRAF3IP2/CD40/MYD88	24
BP	GO:0032602	chemokine production	13/558	95/18862	4.38571e-06	0.000793265	0.000684017	APP/SIRPA/TLR4/LILRB4/MEFV/C1QTNF3/HMOX1/TLR2/IL17RA/NOD2/KLF4/SYK/MYD88	13
BP	GO:0002237	response to molecule of bacterial origin	27/558	346/18862	4.92476e-06	0.000800042	0.000689861	SPARC/F2R/PTAFR/SIRPA/CD68/TLR4/CX3CR1/HCK/CASP1/LILRA2/SCIMP/CD86/LY86/CEBPB/LILRB2/TRIB1/CARD16/AKIRIN2/TLR2/SLC11A1/C5AR1/NOD2/NLRP3/SIRT2/CD40/MYD88/CD180	27
BP	GO:0032731	positive regulation of interleukin-1 beta production	10/558	56/18862	4.95592e-06	0.000800042	0.000689861	APP/TLR4/P2RX7/CASP1/LILRA2/TLR8/NLRP12/NOD2/NLRP3/NLRC4	10
BP	GO:0032496	response to lipopolysaccharide	26/558	326/18862	4.97608e-06	0.000800042	0.000689861	SPARC/F2R/PTAFR/SIRPA/CD68/TLR4/CX3CR1/HCK/CASP1/LILRA2/SCIMP/CD86/LY86/CEBPB/LILRB2/TRIB1/CARD16/AKIRIN2/TLR2/SLC11A1/C5AR1/NOD2/NLRP3/CD40/MYD88/CD180	26
BP	GO:1903037	regulation of leukocyte cell-cell adhesion	26/558	330/18862	6.19836e-06	0.000960967	0.000828623	VSIR/EFNB1/PTAFR/SIRPA/LGALS1/CD1D/CD86/IL6ST/ITGB2/SIRPB1/LGALS3/LILRB4/CEBPB/SOX4/LILRB2/CCDC88B/CD4/FGL2/RIPOR2/LAPTM5/NOD2/KLF4/ZBTB7B/SYK/NLRP3/SOX12	26
BP	GO:0034341	response to interferon-gamma	19/558	197/18862	6.54651e-06	0.000979945	0.000844987	PTAFR/IFITM1/IFNGR2/SIRPA/IFNGR1/TLR4/FCGR1A/HCK/CASP1/SLC26A6/MEFV/FCGR1B/WAS/TRIM26/TLR2/VAMP3/SLC11A1/IFI30/CD40	19
BP	GO:0030004	cellular monovalent inorganic cation homeostasis	14/558	115/18862	7.66148e-06	0.0011055	0.000953251	CLIC4/ATP6V1E1/ATP6V0D1/GRN/RAB39A/KCNJ2/SLC26A6/ATP6AP2/ATP1B1/TCIRG1/PPT1/HVCN1/SLC11A1/SLC8A1	14
BP	GO:0001774	microglial cell activation	9/558	47/18862	8.13094e-06	0.0011055	0.000953251	APP/IFNGR1/ITGAM/GRN/ITGB2/TLR8/TLR2/C5AR1/FPR2	9
BP	GO:0010952	positive regulation of peptidase activity	19/558	200/18862	8.14928e-06	0.0011055	0.000953251	APP/F2R/VSIR/EFNA1/GRN/CASP1/MEFV/NLRP12/TNFSF10/AKIRIN2/LAPTM5/PRELID1/TNFRSF10B/SYK/NLRP3/HIP1/CTSH/HIP1R/NLRC4	19
BP	GO:1902563	regulation of neutrophil activation	5/558	11/18862	8.87032e-06	0.00116685	0.00100615	PTAFR/ITGAM/GRN/ITGB2/SYK	5
BP	GO:1902105	regulation of leukocyte differentiation	23/558	279/18862	1.01809e-05	0.00129986	0.00112085	HOXA7/VSIR/TLR4/HCLS1/MAFB/CD86/CCR1/LILRB4/CEBPB/CDK6/SOX4/LILRB2/TRIB1/TFE3/CD101/CD4/FGL2/NFAM1/PRELID1/ZBTB7B/SYK/NLRP3/SOX12	23
BP	GO:0046651	lymphocyte proliferation	23/558	282/18862	1.2113e-05	0.00150236	0.00129546	VSIR/EFNB1/TLR4/CD1D/CD86/IL6ST/LGALS3/LST1/LILRB4/CEBPB/PLCL2/LILRB2/BST1/CCDC88B/CD4/SLC11A1/ZBTB7B/SYK/CCND3/CD40/MYD88/CD180/PSMB10	23
BP	GO:0098543	detection of other organism	6/558	19/18862	1.27454e-05	0.00153688	0.00132522	TLR4/CD1D/TLR2/NOD2/NAIP/NLRC4	6
BP	GO:0007159	leukocyte cell-cell adhesion	27/558	366/18862	1.37188e-05	0.00159964	0.00137934	VSIR/EFNB1/PTAFR/SIRPA/LGALS1/CX3CR1/CD1D/CD86/IL6ST/ITGB2/SIRPB1/LGALS3/LILRB4/CEBPB/SOX4/LILRB2/CCDC88B/CD4/FGL2/RIPOR2/LAPTM5/NOD2/KLF4/ZBTB7B/SYK/NLRP3/SOX12	27
BP	GO:0002221	pattern recognition receptor signaling pathway	19/558	208/18862	1.4288e-05	0.00159964	0.00137934	WDFY1/TLR4/ITGAM/CTSL/LILRA2/SCIMP/ITGB2/CTSB/TLR8/CD300LF/TLR2/UNC93B1/UBC/NOD2/SLC15A3/TLR5/UBE2D1/CD40/MYD88	19
BP	GO:0032943	mononuclear cell proliferation	23/558	285/18862	1.43714e-05	0.00159964	0.00137934	VSIR/EFNB1/TLR4/CD1D/CD86/IL6ST/LGALS3/LST1/LILRB4/CEBPB/PLCL2/LILRB2/BST1/CCDC88B/CD4/SLC11A1/ZBTB7B/SYK/CCND3/CD40/MYD88/CD180/PSMB10	23
BP	GO:0032732	positive regulation of interleukin-1 production	10/558	64/18862	1.70536e-05	0.00185074	0.00159586	APP/TLR4/P2RX7/CASP1/LILRA2/TLR8/NLRP12/NOD2/NLRP3/NLRC4	10
BP	GO:0002577	regulation of antigen processing and presentation	6/558	20/18862	1.77538e-05	0.00187974	0.00162086	CD68/LILRB2/WAS/FGL2/SLC11A1/NOD2	6
BP	GO:0070661	leukocyte proliferation	24/558	312/18862	2.08115e-05	0.00215101	0.00185478	VSIR/EFNB1/TLR4/CD1D/CD86/IL6ST/LGALS3/LST1/LILRB4/CEBPB/PLCL2/LILRB2/BST1/CCDC88B/TCIRG1/CD4/SLC11A1/ZBTB7B/SYK/CCND3/CD40/MYD88/CD180/PSMB10	24
BP	GO:1903039	positive regulation of leukocyte cell-cell adhesion	20/558	234/18862	2.27011e-05	0.00229176	0.00197614	VSIR/EFNB1/PTAFR/SIRPA/LGALS1/CD1D/CD86/IL6ST/ITGB2/SIRPB1/LILRB4/SOX4/LILRB2/CCDC88B/CD4/NOD2/ZBTB7B/SYK/NLRP3/SOX12	20
BP	GO:0055067	monovalent inorganic cation homeostasis	16/558	161/18862	2.39367e-05	0.00236157	0.00203634	CLIC4/ATP6V1E1/ATP6V0D1/GRN/RAB39A/KCNJ2/SLC26A6/ATP6AP2/ATP1B1/TCIRG1/SLC12A9/PPT1/HVCN1/SLC11A1/SLC12A8/SLC8A1	16
BP	GO:0051090	regulation of DNA-binding transcription factor activity	30/558	444/18862	2.51338e-05	0.00242457	0.00209066	APP/CAT/AR/TLR4/HCLS1/CX3CR1/HCK/ITGB2/TP53BP1/SLCO3A1/CYTL1/TRIB1/HDAC4/NLRP12/TRIM26/WWP2/CARD16/ZNF431/HMOX1/TLR2/NFAM1/UBC/NOD2/KLF4/SYK/NLRP3/CARF/NLRC4/CD40/MYD88	30
BP	GO:0006909	phagocytosis	27/558	381/18862	2.79311e-05	0.00263585	0.00227284	ATG3/SIRPA/ARPC1B/TLR4/FCGR1A/MYO7A/FCER1G/ITGAM/HCK/NCF2/FGR/ITGB2/RAB39A/SIRPB1/CD93/APOA2/WAS/CD300LF/TLR2/ABCA7/ACTB/SLC11A1/NOD2/SYK/BIN2/FPR2/MYD88	27
BP	GO:0010950	positive regulation of endopeptidase activity	17/558	182/18862	3.00696e-05	0.00277728	0.0023948	F2R/VSIR/EFNA1/CASP1/MEFV/NLRP12/TNFSF10/AKIRIN2/LAPTM5/PRELID1/TNFRSF10B/SYK/NLRP3/HIP1/CTSH/HIP1R/NLRC4	17
BP	GO:0051452	intracellular pH reduction	9/558	55/18862	3.07467e-05	0.00278066	0.00239771	CLIC4/ATP6V1E1/ATP6V0D1/GRN/RAB39A/ATP6AP2/TCIRG1/PPT1/SLC11A1	9
BP	GO:0072593	reactive oxygen species metabolic process	22/558	281/18862	3.49411e-05	0.0030955	0.00266919	CD34/PARL/CAT/SIRPA/TLR4/CX3CR1/ITGAM/NCF1/NCF2/NCF1B/ITGB2/TIGAR/NCF1C/BST1/HDAC4/TLR2/HVCN1/KLF4/SYK/ABCD1/FPR2/SIRT2	22
BP	GO:0002573	myeloid leukocyte differentiation	18/558	204/18862	3.79448e-05	0.0032434	0.00279672	APP/HOXA7/NKX2-3/TLR4/HCLS1/MAFB/CCR1/LILRB4/CEBPB/IL31RA/CDK6/TRIB1/TFE3/TCIRG1/CD101/CD4/TLR2/ANXA2	18
BP	GO:0006801	superoxide metabolic process	10/558	70/18862	3.81049e-05	0.0032434	0.00279672	ITGAM/NCF1/NCF2/NCF1B/ITGB2/NCF1C/BST1/HVCN1/SYK/FPR2	10
BP	GO:1903131	mononuclear cell differentiation	28/558	411/18862	4.02975e-05	0.00328958	0.00283654	HOXA7/VSIR/NKX2-3/LGALS1/FCER1G/CTSL/CD1D/MAFB/CD86/LILRB4/CEBPB/PLCL2/IL31RA/LFNG/CDK6/SOX4/PATZ1/LILRB2/HDAC4/TCIRG1/CD4/FGL2/NFAM1/PRELID1/ZBTB7B/SYK/NLRP3/SOX12	28
BP	GO:0032757	positive regulation of interleukin-8 production	9/558	57/18862	4.1279e-05	0.00328958	0.00283654	F2R/TLR4/TLR8/APOA2/TLR2/NOD2/SYK/TLR5/MYD88	9
BP	GO:0055094	response to lipoprotein particle	7/558	33/18862	4.17812e-05	0.00328958	0.00283654	CD68/CES1/TLR4/FCER1G/ITGB2/SYK/MYD88	7
BP	GO:0050867	positive regulation of cell activation	28/558	412/18862	4.20611e-05	0.00328958	0.00283654	VSIR/EFNB1/PTAFR/SIRPA/LGALS1/TLR4/ITGAM/FGR/LILRA2/CD1D/CD86/IL6ST/ITGB2/SIRPB1/TP53BP1/LILRB4/SOX4/LILRB2/BST1/CCDC88B/CD4/NOD2/ZBTB7B/SYK/NLRP3/CD40/MYD88/SOX12	28
BP	GO:0007040	lysosome organization	10/558	71/18862	4.31942e-05	0.00328958	0.00283654	MYO7A/HEXB/TFEB/GRN/RAB39A/ATP6AP2/PPT1/LAPTM5/GAA/ACP2	10
BP	GO:0080171	lytic vacuole organization	10/558	71/18862	4.31942e-05	0.00328958	0.00283654	MYO7A/HEXB/TFEB/GRN/RAB39A/ATP6AP2/PPT1/LAPTM5/GAA/ACP2	10
BP	GO:0050863	regulation of T cell activation	24/558	327/18862	4.43901e-05	0.00332237	0.00286481	VSIR/EFNB1/SIRPA/LGALS1/CD1D/CD86/IL6ST/SIRPB1/LGALS3/LILRB4/CEBPB/SOX4/LILRB2/CCDC88B/CD4/FGL2/RIPOR2/LAPTM5/PRELID1/NOD2/ZBTB7B/SYK/NLRP3/SOX12	24
BP	GO:0030217	T cell differentiation	20/558	246/18862	4.63544e-05	0.00335552	0.0028934	VSIR/NKX2-3/FCER1G/CTSL/CD1D/MAFB/CD86/LILRB4/LFNG/SOX4/PATZ1/LILRB2/TCIRG1/CD4/FGL2/PRELID1/ZBTB7B/SYK/NLRP3/SOX12	20
BP	GO:0051091	positive regulation of DNA-binding transcription factor activity	21/558	266/18862	4.6379e-05	0.00335552	0.0028934	APP/CAT/AR/TLR4/HCLS1/CX3CR1/ITGB2/TP53BP1/SLCO3A1/CYTL1/HDAC4/TRIM26/CARD16/TLR2/NFAM1/UBC/NOD2/NLRP3/NLRC4/CD40/MYD88	21
BP	GO:0045851	pH reduction	9/558	58/18862	4.75958e-05	0.00338711	0.00292063	CLIC4/ATP6V1E1/ATP6V0D1/GRN/RAB39A/ATP6AP2/TCIRG1/PPT1/SLC11A1	9
BP	GO:0071402	cellular response to lipoprotein particle stimulus	7/558	34/18862	5.12818e-05	0.00359055	0.00309606	CD68/CES1/TLR4/FCER1G/ITGB2/SYK/MYD88	7
BP	GO:0098581	detection of external biotic stimulus	6/558	24/18862	5.57376e-05	0.00368622	0.00317856	TLR4/CD1D/TLR2/NOD2/NAIP/NLRC4	6
BP	GO:0002532	production of molecular mediator involved in inflammatory response	11/558	88/18862	5.6108e-05	0.00368622	0.00317856	SIRPA/TLR4/PLD3/GRN/LILRB4/MEFV/NOD2/SYK/GPSM3/ABCD1/MYD88	11
BP	GO:0051453	regulation of intracellular pH	11/558	88/18862	5.6108e-05	0.00368622	0.00317856	CLIC4/ATP6V1E1/ATP6V0D1/GRN/RAB39A/SLC26A6/ATP6AP2/TCIRG1/PPT1/HVCN1/SLC11A1	11
BP	GO:2000116	regulation of cysteine-type endopeptidase activity	19/558	230/18862	5.7526e-05	0.00368622	0.00317856	F2R/CASP1/MEFV/NLRP12/TNFSF10/CARD16/CDKN2D/LAPTM5/TNFRSF10B/KLF4/SYK/NAIP/NLRP3/HIP1/CTSH/HIP1R/CAST/NLRC4/MICAL1	19
BP	GO:0002831	regulation of response to biotic stimulus	28/558	420/18862	5.88824e-05	0.00368622	0.00317856	IFNGR2/IFNGR1/TLR4/SIGLEC16/FCER1G/HCK/FGR/GRN/LILRA2/SCIMP/CD1D/LY86/TIGAR/TRIB1/TLR8/CARD16/AKIRIN2/FGL2/SAMHD1/NOD2/SYK/POLR3G/TRAF3IP2/NLRC4/FPR2/SIRT2/CD180/PSMB10	28
BP	GO:0071260	cellular response to mechanical stimulus	10/558	74/18862	6.20816e-05	0.00368622	0.00317856	TLR4/CASP1/KCNJ2/TLR8/HDAC4/RIPOR2/TNFRSF10B/TLR5/CD40/MYD88	10
BP	GO:0002755	MyD88-dependent toll-like receptor signaling pathway	7/558	35/18862	6.24807e-05	0.00368622	0.00317856	TLR4/TLR8/CD300LF/TLR2/UBC/TLR5/MYD88	7
BP	GO:0042554	superoxide anion generation	7/558	35/18862	6.24807e-05	0.00368622	0.00317856	ITGAM/NCF1/NCF2/ITGB2/HVCN1/SYK/FPR2	7
BP	GO:0032615	interleukin-12 production	9/558	60/18862	6.26986e-05	0.00368622	0.00317856	TLR4/SCIMP/MEFV/TLR8/TLR2/LAPTM5/NOD2/SYK/CD40	9
BP	GO:0032655	regulation of interleukin-12 production	9/558	60/18862	6.26986e-05	0.00368622	0.00317856	TLR4/SCIMP/MEFV/TLR8/TLR2/LAPTM5/NOD2/SYK/CD40	9
BP	GO:0034113	heterotypic cell-cell adhesion	9/558	60/18862	6.26986e-05	0.00368622	0.00317856	ITGA7/SIRPA/ITGAX/IL1RN/CD1D/ITGB2/LILRB2/KLF4/MAPK7	9
BP	GO:0050870	positive regulation of T cell activation	18/558	212/18862	6.28382e-05	0.00368622	0.00317856	VSIR/EFNB1/SIRPA/LGALS1/CD1D/CD86/IL6ST/SIRPB1/LILRB4/SOX4/LILRB2/CCDC88B/CD4/NOD2/ZBTB7B/SYK/NLRP3/SOX12	18
BP	GO:0002696	positive regulation of leukocyte activation	27/558	401/18862	6.72668e-05	0.0038934	0.0033572	VSIR/EFNB1/PTAFR/SIRPA/LGALS1/TLR4/ITGAM/FGR/CD1D/CD86/IL6ST/ITGB2/SIRPB1/TP53BP1/LILRB4/SOX4/LILRB2/BST1/CCDC88B/CD4/NOD2/ZBTB7B/SYK/NLRP3/CD40/MYD88/SOX12	27
BP	GO:0007033	vacuole organization	16/558	176/18862	7.0912e-05	0.0040195	0.00346593	ATG3/CHMP4B/MYO7A/HEXB/TFEB/GRN/RAB39A/ATP6AP2/TCIRG1/PPT1/C9orf72/LAPTM5/GAA/VMP1/ACP2/ANXA2	16
BP	GO:0031664	regulation of lipopolysaccharide-mediated signaling pathway	6/558	25/18862	7.15156e-05	0.0040195	0.00346593	LILRA2/SCIMP/LY86/TRIB1/CARD16/CD180	6
BP	GO:0019882	antigen processing and presentation	19/558	234/18862	7.25389e-05	0.0040195	0.00346593	CD68/FCGR1A/FCER1G/CTSL/NCF1/CAPZA1/NCF2/CD1D/FCGR1B/LILRB2/WAS/FGL2/VAMP3/SLC11A1/IFI30/NOD2/AP1S2/CTSH/PSMB10	19
BP	GO:0002683	negative regulation of immune system process	27/558	403/18862	7.31491e-05	0.0040195	0.00346593	HOXA7/VSIR/CD68/TLR4/FGR/GRN/MAFB/CD86/SLA2/LGALS3/LST1/LILRB4/CEBPB/PLCL2/IL31RA/CDK6/LILRB2/TRIB1/APOA2/CD300LF/FGL2/HMOX1/SAMHD1/RIPOR2/LAPTM5/NOD2/ZBTB7B	27
BP	GO:0052548	regulation of endopeptidase activity	28/558	426/18862	7.52442e-05	0.00405165	0.00349366	APP/F2R/VSIR/BIN1/EFNA1/CASP1/MEFV/NLRP12/TNFSF10/CARD16/AKIRIN2/CDKN2D/LAPTM5/PRELID1/TNFRSF10B/KLF4/SYK/NAIP/NLRP3/HIP1/SERPINB8/CTSH/HIP1R/CAST/SERPINA1/NLRC4/MICAL1/ANXA2	28
BP	GO:0045730	respiratory burst	7/558	36/18862	7.5601e-05	0.00405165	0.00349366	NCF1/HCK/NCF2/GRN/NCF1B/NCF1C/SLC11A1	7
BP	GO:0051092	positive regulation of NF-kappaB transcription factor activity	15/558	159/18862	7.78789e-05	0.00412283	0.00355504	APP/CAT/AR/TLR4/CX3CR1/ITGB2/SLCO3A1/CARD16/TLR2/UBC/NOD2/NLRP3/NLRC4/CD40/MYD88	15
BP	GO:0052547	regulation of peptidase activity	29/558	455/18862	9.66193e-05	0.00505331	0.00435737	APP/F2R/VSIR/BIN1/EFNA1/GRN/CASP1/MEFV/NLRP12/TNFSF10/CARD16/AKIRIN2/CDKN2D/LAPTM5/PRELID1/TNFRSF10B/KLF4/SYK/NAIP/NLRP3/HIP1/SERPINB8/CTSH/HIP1R/CAST/SERPINA1/NLRC4/MICAL1/ANXA2	29
BP	GO:0034656	nucleobase-containing small molecule catabolic process	8/558	50/18862	0.000100191	0.00517774	0.00446466	CDA/NUDT16/TYMP/APOBEC3A/UPP1/CDADC1/MGAT1/ADA2	8
BP	GO:0016045	detection of bacterium	5/558	17/18862	0.000102508	0.00521663	0.00449819	CD1D/TLR2/NOD2/NAIP/NLRC4	5
BP	GO:0045862	positive regulation of proteolysis	25/558	367/18862	0.000103347	0.00521663	0.00449819	APP/F2R/VSIR/EFNA1/PRICKLE1/GRN/CASP1/MEFV/TRIB1/WDR48/NLRP12/TNFSF10/AKIRIN2/DET1/LAPTM5/PRELID1/TNFRSF10B/LPCAT3/SYK/NLRP3/HIP1/CTSH/HIP1R/NLRC4/SIRT2	25
BP	GO:0002695	negative regulation of leukocyte activation	16/558	182/18862	0.000105538	0.00526599	0.00454076	VSIR/FGR/GRN/CD86/LGALS3/LST1/LILRB4/CEBPB/IL31RA/LILRB2/CD300LF/FGL2/HMOX1/RIPOR2/LAPTM5/ZBTB7B	16
BP	GO:0050670	regulation of lymphocyte proliferation	18/558	221/18862	0.000107232	0.00528972	0.00456122	VSIR/EFNB1/TLR4/CD1D/CD86/IL6ST/LGALS3/LST1/LILRB4/CEBPB/LILRB2/BST1/CCDC88B/CD4/ZBTB7B/SYK/CD40/MYD88	18
BP	GO:0009595	detection of biotic stimulus	7/558	38/18862	0.000108592	0.00529662	0.00456717	TLR4/CD1D/TLR2/NOD2/NAIP/NLRP3/NLRC4	7
BP	GO:0030641	regulation of cellular pH	11/558	95/18862	0.000113646	0.00548155	0.00472663	CLIC4/ATP6V1E1/ATP6V0D1/GRN/RAB39A/SLC26A6/ATP6AP2/TCIRG1/PPT1/HVCN1/SLC11A1	11
BP	GO:0022407	regulation of cell-cell adhesion	28/558	437/18862	0.000116171	0.00554173	0.00477852	VSIR/EFNB1/PTAFR/SIRPA/LGALS1/IL1RN/CD1D/CD86/IL6ST/ITGB2/SIRPB1/LGALS3/LILRB4/CEBPB/SOX4/LILRB2/CCDC88B/CD4/FGL2/RIPOR2/LAPTM5/NOD2/KLF4/ZBTB7B/SYK/NLRP3/SOX12/MAPK7	28
BP	GO:0007584	response to nutrient	15/558	165/18862	0.000118417	0.00558748	0.00481797	SPARC/MN1/CAT/DNMT3A/BCKDHB/VDR/ACSL1/PKM/CD4/HMOX1/CDKN2D/NOD2/SLC8A1/CD40/USF1	15
BP	GO:0032944	regulation of mononuclear cell proliferation	18/558	223/18862	0.000120217	0.0056114	0.0048386	VSIR/EFNB1/TLR4/CD1D/CD86/IL6ST/LGALS3/LST1/LILRB4/CEBPB/LILRB2/BST1/CCDC88B/CD4/ZBTB7B/SYK/CD40/MYD88	18
BP	GO:0043281	regulation of cysteine-type endopeptidase activity involved in apoptotic process	17/558	205/18862	0.000133014	0.0061427	0.00529673	F2R/CASP1/NLRP12/TNFSF10/CARD16/CDKN2D/LAPTM5/TNFRSF10B/KLF4/SYK/NAIP/NLRP3/HIP1/CTSH/HIP1R/NLRC4/MICAL1	17
BP	GO:0001991	regulation of systemic arterial blood pressure by circulatory renin-angiotensin	5/558	18/18862	0.000138494	0.00626251	0.00540004	F2R/CES1/CTSZ/ATP6AP2/PCSK5	5
BP	GO:0032930	positive regulation of superoxide anion generation	5/558	18/18862	0.000138494	0.00626251	0.00540004	ITGAM/ITGB2/HVCN1/SYK/FPR2	5
BP	GO:0050766	positive regulation of phagocytosis	9/558	67/18862	0.000150975	0.00671035	0.0057862	SIRPA/FCER1G/SIRPB1/APOA2/CD300LF/ABCA7/SLC11A1/NOD2/FPR2	9
BP	GO:0032735	positive regulation of interleukin-12 production	7/558	40/18862	0.000152422	0.00671035	0.0057862	TLR4/SCIMP/TLR2/LAPTM5/NOD2/SYK/CD40	7
BP	GO:0071320	cellular response to cAMP	8/558	53/18862	0.000153035	0.00671035	0.0057862	APP/KCNE1/PTAFR/KCNQ1/SLC26A6/ITPR2/SLC8A1/EEF2K	8
BP	GO:0002285	lymphocyte activation involved in immune response	16/558	189/18862	0.000163897	0.00711477	0.00613492	NKX2-3/LGALS1/TLR4/FCER1G/LCP1/CD86/LGALS3/TP53BP1/PLCL2/LFNG/FGL2/SLC11A1/ZBTB7B/NLRP3/CD40/CD180	16
BP	GO:1900015	regulation of cytokine production involved in inflammatory response	9/558	68/18862	0.000169513	0.0072857	0.00628232	SIRPA/TLR4/PLD3/LILRB4/MEFV/NOD2/GPSM3/ABCD1/MYD88	9
BP	GO:0030098	lymphocyte differentiation	24/558	358/18862	0.00017992	0.0076572	0.00660265	VSIR/NKX2-3/LGALS1/FCER1G/CTSL/CD1D/MAFB/CD86/LILRB4/PLCL2/LFNG/SOX4/PATZ1/LILRB2/HDAC4/TCIRG1/CD4/FGL2/NFAM1/PRELID1/ZBTB7B/SYK/NLRP3/SOX12	24
BP	GO:0002534	cytokine production involved in inflammatory response	9/558	69/18862	0.000189909	0.00800385	0.00690156	SIRPA/TLR4/PLD3/LILRB4/MEFV/NOD2/GPSM3/ABCD1/MYD88	9
BP	GO:2000377	regulation of reactive oxygen species metabolic process	16/558	192/18862	0.000196472	0.00803108	0.00692504	CD34/PARL/SIRPA/TLR4/CX3CR1/ITGAM/ITGB2/TIGAR/BST1/HDAC4/HVCN1/KLF4/SYK/ABCD1/FPR2/SIRT2	16
BP	GO:0002761	regulation of myeloid leukocyte differentiation	12/558	118/18862	0.000197193	0.00803108	0.00692504	HOXA7/TLR4/HCLS1/MAFB/CCR1/LILRB4/CEBPB/CDK6/TRIB1/TFE3/CD101/CD4	12
BP	GO:1902107	positive regulation of leukocyte differentiation	14/558	154/18862	0.000197956	0.00803108	0.00692504	VSIR/HCLS1/CD86/CCR1/LILRB4/SOX4/LILRB2/TRIB1/CD101/CD4/ZBTB7B/SYK/NLRP3/SOX12	14
BP	GO:1903708	positive regulation of hemopoiesis	14/558	154/18862	0.000197956	0.00803108	0.00692504	VSIR/HCLS1/CD86/CCR1/LILRB4/SOX4/LILRB2/TRIB1/CD101/CD4/ZBTB7B/SYK/NLRP3/SOX12	14
BP	GO:0014002	astrocyte development	7/558	42/18862	0.000209577	0.00828585	0.00714473	APP/IFNGR1/TLR4/GRN/CDK6/C5AR1/FPR2	7
BP	GO:0002604	regulation of dendritic cell antigen processing and presentation	4/558	11/18862	0.00021187	0.00828585	0.00714473	CD68/FGL2/SLC11A1/NOD2	4
BP	GO:0008655	pyrimidine-containing compound salvage	4/558	11/18862	0.00021187	0.00828585	0.00714473	CDA/TYMP/UPP1/PUDP	4
BP	GO:0043097	pyrimidine nucleoside salvage	4/558	11/18862	0.00021187	0.00828585	0.00714473	CDA/TYMP/UPP1/PUDP	4
BP	GO:0022409	positive regulation of cell-cell adhesion	20/558	276/18862	0.000222924	0.00864029	0.00745035	VSIR/EFNB1/PTAFR/SIRPA/LGALS1/CD1D/CD86/IL6ST/ITGB2/SIRPB1/LILRB4/SOX4/LILRB2/CCDC88B/CD4/NOD2/ZBTB7B/SYK/NLRP3/SOX12	20
BP	GO:0042098	T cell proliferation	16/558	195/18862	0.000234531	0.00886224	0.00764173	VSIR/EFNB1/CD1D/CD86/IL6ST/LGALS3/LILRB4/CEBPB/LILRB2/CCDC88B/CD4/SLC11A1/ZBTB7B/SYK/CCND3/PSMB10	16
BP	GO:0006885	regulation of pH	11/558	103/18862	0.000234775	0.00886224	0.00764173	CLIC4/ATP6V1E1/ATP6V0D1/GRN/RAB39A/SLC26A6/ATP6AP2/TCIRG1/PPT1/HVCN1/SLC11A1	11
BP	GO:0032637	interleukin-8 production	11/558	103/18862	0.000234775	0.00886224	0.00764173	F2R/TLR4/LILRA2/TLR8/APOA2/TLR2/NOD2/KLF4/SYK/TLR5/MYD88	11
BP	GO:0032928	regulation of superoxide anion generation	5/558	20/18862	0.000238621	0.00892976	0.00769995	ITGAM/ITGB2/HVCN1/SYK/FPR2	5
BP	GO:0043300	regulation of leukocyte degranulation	7/558	43/18862	0.000244018	0.0090537	0.00780683	PTAFR/ITGAM/STXBP2/FGR/ITGB2/HMOX1/SYK	7
BP	GO:0042742	defense response to bacterium	23/558	344/18862	0.000253275	0.0093175	0.00803429	RARRES2/TLR4/SIGLEC16/FCER1G/FGR/GRN/CFP/CEBPB/MPEG1/LYZ/RNASE6/CD4/TLR2/SLC11A1/C5AR1/NOD2/SYK/NAIP/TLR5/NLRC4/FPR2/SIRT2/MYD88	23
BP	GO:0071346	cellular response to interferon-gamma	15/558	177/18862	0.000257029	0.00937617	0.00808488	PTAFR/IFNGR2/SIRPA/IFNGR1/TLR4/FCGR1A/HCK/CASP1/SLC26A6/FCGR1B/WAS/TRIM26/TLR2/VAMP3/IFI30	15
BP	GO:0048708	astrocyte differentiation	9/558	72/18862	0.000263713	0.00953982	0.008226	APP/BIN1/IFNGR1/TLR4/GRN/IL6ST/CDK6/C5AR1/FPR2	9
BP	GO:1901136	carbohydrate derivative catabolic process	16/558	198/18862	0.000278825	0.0100031	0.00862551	CDA/NUDT16/CTSL/HEXB/GNS/GM2A/TYMP/APOBEC3A/UPP1/AOAH/SAMHD1/CDADC1/MGAT1/ABCD1/ADA2/HPSE	16
BP	GO:1903706	regulation of hemopoiesis	26/558	415/18862	0.000286184	0.010183	0.0087806	KMT2A/HOXA7/VSIR/TLR4/HCLS1/MAFB/CD86/CCR1/LGALS3/LILRB4/CEBPB/CDK6/SOX4/LILRB2/TRIB1/TFE3/CD101/CD4/FGL2/NFAM1/PRELID1/ZBTB7B/SYK/NLRP3/SOX12/KLF13	26
BP	GO:0090322	regulation of superoxide metabolic process	6/558	32/18862	0.000306931	0.0108324	0.00934057	ITGAM/ITGB2/BST1/HVCN1/SYK/FPR2	6
BP	GO:0050866	negative regulation of cell activation	16/558	200/18862	0.000312223	0.0109244	0.00941993	VSIR/FGR/GRN/CD86/LGALS3/LST1/LILRB4/CEBPB/IL31RA/LILRB2/CD300LF/FGL2/HMOX1/RIPOR2/LAPTM5/ZBTB7B	16
BP	GO:0070663	regulation of leukocyte proliferation	18/558	241/18862	0.000314572	0.0109244	0.00941993	VSIR/EFNB1/TLR4/CD1D/CD86/IL6ST/LGALS3/LST1/LILRB4/CEBPB/LILRB2/BST1/CCDC88B/CD4/ZBTB7B/SYK/CD40/MYD88	18
BP	GO:1903557	positive regulation of tumor necrosis factor superfamily cytokine production	10/558	90/18862	0.000324205	0.0111696	0.00963137	APP/PTAFR/IFNGR1/TLR4/LILRA2/CD86/TLR2/NOD2/SYK/MYD88	10
BP	GO:0006898	receptor-mediated endocytosis	22/558	328/18862	0.000327986	0.0112109	0.00966694	SPARC/FNBP1L/FCGR1A/FCER1G/ITGAM/CTSL/UNC119/ITGB2/DBNL/CLTB/LILRB4/CD163/FCGR1B/ARF6/PPT1/CAP1/SYK/HIP1/HIP1R/FPR2/ANXA2/IGF2R	22
BP	GO:0043123	positive regulation of I-kappaB kinase/NF-kappaB signaling	15/558	182/18862	0.000347061	0.0117703	0.0101493	F2R/LGALS1/TLR4/S100A4/CASP1/ATP2C1/TNFSF10/CARD16/CD4/HMOX1/NOD2/TNFRSF10B/TRAF3IP2/CD40/MYD88	15
BP	GO:0140448	signaling receptor ligand precursor processing	6/558	33/18862	0.000365853	0.0123094	0.0106141	CES1/CTSZ/CTSL/CASP1/ATP6AP2/PCSK5	6
BP	GO:0032722	positive regulation of chemokine production	8/558	60/18862	0.000368629	0.0123094	0.0106141	APP/TLR4/HMOX1/TLR2/IL17RA/NOD2/SYK/MYD88	8
BP	GO:1903555	regulation of tumor necrosis factor superfamily cytokine production	14/558	164/18862	0.00037931	0.0125693	0.0108383	APP/CD34/VSIR/PTAFR/SIRPA/IFNGR1/TLR4/CX3CR1/LILRA2/CD86/TLR2/NOD2/SYK/MYD88	14
BP	GO:0003081	regulation of systemic arterial blood pressure by renin-angiotensin	5/558	22/18862	0.000385945	0.0126923	0.0109444	F2R/CES1/CTSZ/ATP6AP2/PCSK5	5
BP	GO:0051251	positive regulation of lymphocyte activation	23/558	356/18862	0.000411803	0.0134409	0.0115898	VSIR/EFNB1/SIRPA/LGALS1/TLR4/CD1D/CD86/IL6ST/SIRPB1/TP53BP1/LILRB4/SOX4/LILRB2/BST1/CCDC88B/CD4/NOD2/ZBTB7B/SYK/NLRP3/CD40/MYD88/SOX12	23
BP	GO:0030225	macrophage differentiation	7/558	47/18862	0.000430063	0.0139317	0.0120131	APP/NKX2-3/HCLS1/IL31RA/TRIB1/CD4/TLR2	7
BP	GO:0009164	nucleoside catabolic process	6/558	34/18862	0.000433261	0.0139317	0.0120131	CDA/TYMP/APOBEC3A/UPP1/CDADC1/ADA2	6
BP	GO:0006665	sphingolipid metabolic process	14/558	167/18862	0.000455847	0.014444	0.0124548	ORMDL2/SERINC2/SGMS2/PNPLA1/HEXB/GM2A/ORMDL3/ALDH3A2/PSAP/PPT1/GLTP/DEGS1/ACER3/KDSR	14
BP	GO:0071706	tumor necrosis factor superfamily cytokine production	14/558	167/18862	0.000455847	0.014444	0.0124548	APP/CD34/VSIR/PTAFR/SIRPA/IFNGR1/TLR4/CX3CR1/LILRA2/CD86/TLR2/NOD2/SYK/MYD88	14
BP	GO:0043302	positive regulation of leukocyte degranulation	5/558	23/18862	0.000481244	0.0150294	0.0129595	PTAFR/ITGAM/FGR/ITGB2/SYK	5
BP	GO:0046135	pyrimidine nucleoside catabolic process	5/558	23/18862	0.000481244	0.0150294	0.0129595	CDA/TYMP/APOBEC3A/UPP1/CDADC1	5
BP	GO:0002703	regulation of leukocyte mediated immunity	16/558	209/18862	0.000508809	0.0157007	0.0135384	PTAFR/TLR4/ITGAM/STXBP2/FGR/SCIMP/CD1D/ITGB2/TP53BP1/LILRB4/WAS/HMOX1/NOD2/SYK/NLRP3/CD40	16
BP	GO:0065005	protein-lipid complex assembly	6/558	35/18862	0.000509974	0.0157007	0.0135384	BIN1/SOAT1/MFSD2A/APOA2/ABCA7/LPCAT3	6
BP	GO:2001056	positive regulation of cysteine-type endopeptidase activity	13/558	151/18862	0.000559842	0.0171146	0.0147576	F2R/CASP1/MEFV/NLRP12/TNFSF10/LAPTM5/TNFRSF10B/SYK/NLRP3/HIP1/CTSH/HIP1R/NLRC4	13
BP	GO:0032677	regulation of interleukin-8 production	10/558	97/18862	0.000592957	0.0175622	0.0151435	F2R/TLR4/TLR8/APOA2/TLR2/NOD2/KLF4/SYK/TLR5/MYD88	10
BP	GO:0032753	positive regulation of interleukin-4 production	5/558	24/18862	0.00059322	0.0175622	0.0151435	FCER1G/CD86/CEBPB/SYK/NLRP3	5
BP	GO:0042454	ribonucleoside catabolic process	5/558	24/18862	0.00059322	0.0175622	0.0151435	CDA/APOBEC3A/UPP1/CDADC1/ADA2	5
BP	GO:0006213	pyrimidine nucleoside metabolic process	6/558	36/18862	0.000596849	0.0175622	0.0151435	CDA/TYMP/APOBEC3A/UPP1/PUDP/CDADC1	6
BP	GO:0046131	pyrimidine ribonucleoside metabolic process	4/558	14/18862	0.000598756	0.0175622	0.0151435	CDA/APOBEC3A/UPP1/CDADC1	4
BP	GO:0046133	pyrimidine ribonucleoside catabolic process	4/558	14/18862	0.000598756	0.0175622	0.0151435	CDA/APOBEC3A/UPP1/CDADC1	4
BP	GO:0050727	regulation of inflammatory response	23/558	366/18862	0.000604516	0.0176121	0.0151866	APP/SIRPA/TLR4/HCK/SIGLEC10/GRN/CASP1/IL6ST/CEBPB/MEFV/AOAH/BST1/C1QTNF3/NLRP12/TLR2/NOD2/LPCAT3/KLF4/NLRP3/GPSM3/FPR2/MYD88/MAPK7	23
BP	GO:0043280	positive regulation of cysteine-type endopeptidase activity involved in apoptotic process	12/558	135/18862	0.000679782	0.0195426	0.0168512	F2R/CASP1/NLRP12/TNFSF10/LAPTM5/TNFRSF10B/SYK/NLRP3/HIP1/CTSH/HIP1R/NLRC4	12
BP	GO:0050671	positive regulation of lymphocyte proliferation	12/558	135/18862	0.000679782	0.0195426	0.0168512	EFNB1/TLR4/CD1D/CD86/IL6ST/LILRB2/BST1/CCDC88B/CD4/SYK/CD40/MYD88	12
BP	GO:0002833	positive regulation of response to biotic stimulus	18/558	258/18862	0.000706792	0.0201854	0.0174055	TLR4/SIGLEC16/FCER1G/HCK/GRN/LILRA2/SCIMP/CD1D/LY86/TLR8/AKIRIN2/NOD2/SYK/POLR3G/NLRC4/FPR2/CD180/PSMB10	18
BP	GO:0043900	regulation of multi-organism process	7/558	51/18862	0.000715051	0.0202029	0.0174205	LILRA2/SCIMP/LY86/INTS13/TRIB1/CARD16/CD180	7
BP	GO:0032682	negative regulation of chemokine production	5/558	25/18862	0.000723646	0.0202029	0.0174205	SIRPA/LILRB4/MEFV/C1QTNF3/KLF4	5
BP	GO:0048143	astrocyte activation	5/558	25/18862	0.000723646	0.0202029	0.0174205	APP/IFNGR1/GRN/C5AR1/FPR2	5
BP	GO:0032946	positive regulation of mononuclear cell proliferation	12/558	136/18862	0.000726019	0.0202029	0.0174205	EFNB1/TLR4/CD1D/CD86/IL6ST/LILRB2/BST1/CCDC88B/CD4/SYK/CD40/MYD88	12
BP	GO:0071496	cellular response to external stimulus	20/558	303/18862	0.000736619	0.0203673	0.0175623	MN1/VDR/CD68/TLR4/MFSD2A/TFEB/CASP1/KCNJ2/UPP1/TLR8/HDAC4/HMOX1/RIPOR2/TNFRSF10B/UCP2/TLR5/MAX/CD40/MYD88/USF1	20
BP	GO:0002468	dendritic cell antigen processing and presentation	4/558	15/18862	0.000797485	0.0217729	0.0187743	CD68/FGL2/SLC11A1/NOD2	4
BP	GO:1900225	regulation of NLRP3 inflammasome complex assembly	4/558	15/18862	0.000797485	0.0217729	0.0187743	TLR4/MEFV/ATAT1/SIRT2	4
BP	GO:0002886	regulation of myeloid leukocyte mediated immunity	7/558	52/18862	0.000805539	0.021785	0.0187848	PTAFR/ITGAM/STXBP2/FGR/ITGB2/HMOX1/SYK	7
BP	GO:0008217	regulation of blood pressure	14/558	177/18862	0.000812985	0.021785	0.0187848	CD34/F2R/PTAFR/SCPEP1/AR/RARRES2/CES1/CTSZ/AGTRAP/ATP6AP2/HMOX1/PTPRO/PCSK5/ACSM3	14
BP	GO:0051260	protein homooligomerization	14/558	177/18862	0.000812985	0.021785	0.0187848	SHKBP1/TMEM120A/ALOX5AP/KCNA3/KCNJ2/TP53BP1/VASP/ALS2/MCOLN1/SAMHD1/RIPOR2/TRMT61B/KCNC3/NLRC4	14
BP	GO:0002699	positive regulation of immune effector process	16/558	219/18862	0.00084355	0.0224653	0.0193714	PTAFR/TLR4/ITGAM/STXBP2/FGR/SCIMP/CD1D/CD86/ITGB2/TP53BP1/HMOX1/LAPTM5/NOD2/SYK/NLRP3/CD40	16
BP	GO:0045742	positive regulation of epidermal growth factor receptor signaling pathway	6/558	39/18862	0.000927538	0.0245515	0.0211703	NCF1/SHKBP1/PTK6/ARAP1/HIP1/HIP1R	6
BP	GO:0032680	regulation of tumor necrosis factor production	13/558	160/18862	0.000963702	0.0252014	0.0217306	APP/CD34/VSIR/PTAFR/SIRPA/IFNGR1/TLR4/CX3CR1/LILRA2/TLR2/NOD2/SYK/MYD88	13
BP	GO:0050728	negative regulation of inflammatory response	13/558	160/18862	0.000963702	0.0252014	0.0217306	SIRPA/SIGLEC10/GRN/MEFV/AOAH/C1QTNF3/NLRP12/NOD2/LPCAT3/KLF4/NLRP3/FPR2/MAPK7	13
BP	GO:0043122	regulation of I-kappaB kinase/NF-kappaB signaling	17/558	244/18862	0.000998644	0.0259111	0.0223427	F2R/LGALS1/TLR4/S100A4/CASP1/ATP2C1/LILRB4/NLRP12/TNFSF10/CARD16/CD4/HMOX1/NOD2/TNFRSF10B/TRAF3IP2/CD40/MYD88	17
BP	GO:0006968	cellular defense response	7/558	54/18862	0.00101352	0.0259111	0.0223427	CD300C/CX3CR1/NCF1/NCF2/LILRB2/TCIRG1/C5AR1	7
BP	GO:0043174	nucleoside salvage	4/558	16/18862	0.00103859	0.0259111	0.0223427	CDA/TYMP/UPP1/PUDP	4
BP	GO:0044546	NLRP3 inflammasome complex assembly	4/558	16/18862	0.00103859	0.0259111	0.0223427	TLR4/MEFV/ATAT1/SIRT2	4
BP	GO:0045591	positive regulation of regulatory T cell differentiation	4/558	16/18862	0.00103859	0.0259111	0.0223427	VSIR/LILRB4/LILRB2/SOX12	4
BP	GO:0046134	pyrimidine nucleoside biosynthetic process	4/558	16/18862	0.00103859	0.0259111	0.0223427	CDA/TYMP/UPP1/PUDP	4
BP	GO:0071800	podosome assembly	4/558	16/18862	0.00103859	0.0259111	0.0223427	HCK/LCP1/DBNL/BIN2	4
BP	GO:0090594	inflammatory response to wounding	4/558	16/18862	0.00103859	0.0259111	0.0223427	F2R/SIGLEC10/GRN/HMOX1	4
BP	GO:0006919	activation of cysteine-type endopeptidase activity involved in apoptotic process	9/558	87/18862	0.00107514	0.0265029	0.022853	F2R/NLRP12/TNFSF10/LAPTM5/TNFRSF10B/HIP1/CTSH/HIP1R/NLRC4	9
BP	GO:0032760	positive regulation of tumor necrosis factor production	9/558	87/18862	0.00107514	0.0265029	0.022853	APP/PTAFR/IFNGR1/TLR4/LILRA2/TLR2/NOD2/SYK/MYD88	9
BP	GO:0032640	tumor necrosis factor production	13/558	162/18862	0.00108063	0.0265029	0.022853	APP/CD34/VSIR/PTAFR/SIRPA/IFNGR1/TLR4/CX3CR1/LILRA2/TLR2/NOD2/SYK/MYD88	13
BP	GO:0042552	myelination	11/558	124/18862	0.0011424	0.0278605	0.0240235	CMTM8/ITGAX/HEXB/TYMP/ORMDL3/TLR2/SBF2/DEGS1/ABCD1/SIRT2/ACER3	11
BP	GO:0045582	positive regulation of T cell differentiation	9/558	88/18862	0.00116691	0.0282993	0.0244019	VSIR/CD86/LILRB4/SOX4/LILRB2/ZBTB7B/SYK/NLRP3/SOX12	9
BP	GO:0002685	regulation of leukocyte migration	15/558	205/18862	0.00119277	0.0287657	0.0248041	APP/HOXA7/PTAFR/RARRES2/CX3CR1/CCR1/LGALS3/BST1/HMOX1/RIPOR2/C5AR1/NOD2/GPSM3/FPR2/MYD88	15
BP	GO:1901186	positive regulation of ERBB signaling pathway	6/558	41/18862	0.00121606	0.0291654	0.0251487	NCF1/SHKBP1/PTK6/ARAP1/HIP1/HIP1R	6
BP	GO:0042058	regulation of epidermal growth factor receptor signaling pathway	9/558	89/18862	0.0012649	0.0301701	0.0260151	MVP/NCF1/SHKBP1/PTK6/ARAP1/HIP1/HIP1R/RNF115/RHBDF2	9
BP	GO:0007015	actin filament organization	25/558	435/18862	0.00128215	0.0304143	0.0262256	MICAL3/BIN1/ARPC1B/HCLS1/MYO7A/HCK/ZBED3/CDC42EP3/LCP1/CAPZA1/MYO1E/DBNL/ARHGEF10L/VASP/ARF6/WAS/CORO7/MYO1F/C9orf72/ARAP1/HIP1/HIP1R/TPM3/STMN1/MICAL1	25
BP	GO:0007272	ensheathment of neurons	11/558	126/18862	0.00130195	0.0305501	0.0263427	CMTM8/ITGAX/HEXB/TYMP/ORMDL3/TLR2/SBF2/DEGS1/ABCD1/SIRT2/ACER3	11
BP	GO:0008366	axon ensheathment	11/558	126/18862	0.00130195	0.0305501	0.0263427	CMTM8/ITGAX/HEXB/TYMP/ORMDL3/TLR2/SBF2/DEGS1/ABCD1/SIRT2/ACER3	11
BP	GO:1900424	regulation of defense response to bacterium	4/558	17/18862	0.00132662	0.0309616	0.0266976	SIGLEC16/GRN/NOD2/SIRT2	4
BP	GO:0050885	neuromuscular process controlling balance	6/558	42/18862	0.00138381	0.0321237	0.0276996	APP/MYO7A/HEXB/GM2A/GAA/CDH23	6
BP	GO:0001818	negative regulation of cytokine production	22/558	367/18862	0.00144814	0.0334382	0.0288331	CD34/VSIR/SIRPA/TLR4/CX3CR1/NPTN/LILRB4/MEFV/TLR8/APOA2/C1QTNF3/NLRP12/MIR373/CARD16/HMOX1/TIA1/SLC11A1/LAPTM5/NOD2/KLF4/NLRP3/ABCD1	22
BP	GO:0042129	regulation of T cell proliferation	13/558	168/18862	0.00150471	0.0345606	0.0298009	VSIR/EFNB1/CD1D/CD86/IL6ST/LGALS3/LILRB4/CEBPB/LILRB2/CCDC88B/CD4/ZBTB7B/SYK	13
BP	GO:0070665	positive regulation of leukocyte proliferation	12/558	148/18862	0.00151855	0.034693	0.0299151	EFNB1/TLR4/CD1D/CD86/IL6ST/LILRB2/BST1/CCDC88B/CD4/SYK/CD40/MYD88	12
BP	GO:0002697	regulation of immune effector process	26/558	465/18862	0.00152646	0.034693	0.0299151	PTAFR/TLR4/ITGAM/STXBP2/FGR/GRN/SCIMP/CD1D/CD86/CFP/ITGB2/LGALS3/TP53BP1/LILRB4/APOA2/WAS/FGL2/HMOX1/LAPTM5/C5AR1/NOD2/ZBTB7B/SYK/NLRP3/TRAF3IP2/CD40	26
BP	GO:0034142	toll-like receptor 4 signaling pathway	6/558	43/18862	0.00156864	0.0352823	0.0304232	WDFY1/TLR4/ITGAM/LILRA2/SCIMP/ITGB2	6
BP	GO:0045454	cell redox homeostasis	6/558	43/18862	0.00156864	0.0352823	0.0304232	NCF1/NCF2/GSR/HVCN1/SLC11A1/ERP44	6
BP	GO:0032868	response to insulin	18/558	278/18862	0.0016486	0.0368896	0.0318092	CAT/RARRES2/ZDHHC7/SORT1/ATP6V1E1/ATP6V0D1/ZBED3/PKM/SMARCC1/TNFSF10/TCIRG1/TLR2/ZBTB7B/UCP2/CCND3/MAX/EEF2K/USF1	18
BP	GO:0046683	response to organophosphorus	11/558	130/18862	0.0016761	0.0373125	0.0321738	APP/SPARC/KCNE1/PTAFR/P2RX7/CASP1/KCNQ1/SLC26A6/ITPR2/SLC8A1/EEF2K	11
BP	GO:0035666	TRIF-dependent toll-like receptor signaling pathway	5/558	30/18862	0.00171848	0.0378267	0.0326172	TLR4/CD300LF/UBC/UBE2D1/CD40	5
BP	GO:0050858	negative regulation of antigen receptor-mediated signaling pathway	5/558	30/18862	0.00171848	0.0378267	0.0326172	SLA2/LGALS3/LILRB4/PLCL2/LAPTM5	5
BP	GO:0051591	response to cAMP	9/558	93/18862	0.00172534	0.0378267	0.0326172	APP/SPARC/KCNE1/PTAFR/KCNQ1/SLC26A6/ITPR2/SLC8A1/EEF2K	9
BP	GO:1901658	glycosyl compound catabolic process	6/558	44/18862	0.00177166	0.0386471	0.0333247	CDA/TYMP/APOBEC3A/UPP1/CDADC1/ADA2	6
BP	GO:0021782	glial cell development	10/558	112/18862	0.00180109	0.0389005	0.0335431	APP/IFNGR1/TLR4/GRN/CDK6/SOX4/TLR2/C5AR1/FPR2/SIRT2	10
BP	GO:0008360	regulation of cell shape	12/558	151/18862	0.0018012	0.0389005	0.0335431	ITGA7/HCK/CDC42EP3/HEXB/FGR/FGD4/ITGB2/LST1/FGD2/WDPCP/ARAP1/RHOU	12
BP	GO:0031348	negative regulation of defense response	16/558	236/18862	0.00183966	0.0395345	0.0340898	SIRPA/SIGLEC10/GRN/MEFV/AOAH/C1QTNF3/NLRP12/FGL2/SAMHD1/NOD2/LPCAT3/KLF4/NLRP3/FPR2/SIRT2/MAPK7	16
BP	GO:0032653	regulation of interleukin-10 production	7/558	60/18862	0.00189829	0.0405935	0.035003	CD34/VSIR/TLR4/LILRB4/TLR2/NOD2/SYK	7
BP	GO:0006643	membrane lipid metabolic process	15/558	215/18862	0.00191054	0.0406552	0.0350561	ORMDL2/SERINC2/SGMS2/PNPLA1/HEXB/GM2A/ORMDL3/ALDH3A2/PSAP/PPT1/GLTP/DEGS1/PIGP/ACER3/KDSR	15
BP	GO:0001894	tissue homeostasis	17/558	260/18862	0.00197853	0.0418965	0.0361265	LTBP3/CD34/F2R/CHMP4B/TLR4/MFSD2A/P2RX7/CYTL1/LYZ/TCIRG1/BBS1/ACTB/NOD2/SYK/CTSH/CDH23/LPCAT1	17
BP	GO:0034377	plasma lipoprotein particle assembly	5/558	31/18862	0.00199978	0.0421409	0.0363373	SOAT1/MFSD2A/APOA2/ABCA7/LPCAT3	5
BP	GO:0051250	negative regulation of lymphocyte activation	12/558	153/18862	0.0020126	0.0422063	0.0363937	VSIR/FGR/CD86/LGALS3/LST1/LILRB4/CEBPB/LILRB2/FGL2/RIPOR2/LAPTM5/ZBTB7B	12
BP	GO:0030050	vesicle transport along actin filament	4/558	19/18862	0.00206147	0.0430232	0.0370981	FNBP1L/MYO7A/MYO1E/MYO1F	4
BP	GO:0050730	regulation of peptidyl-tyrosine phosphorylation	17/558	262/18862	0.00214442	0.0444796	0.0383538	APP/EFNA1/MVP/FCGR1A/HCLS1/NCF1/UNC119/PTK6/IL6ST/ITGB2/LILRB4/IL31RA/BST1/CD4/NOD2/SYK/CD40	17
BP	GO:1901184	regulation of ERBB signaling pathway	9/558	96/18862	0.00215174	0.0444796	0.0383538	MVP/NCF1/SHKBP1/PTK6/ARAP1/HIP1/HIP1R/RNF115/RHBDF2	9
BP	GO:0097529	myeloid leukocyte migration	15/558	218/18862	0.00218557	0.0449119	0.0387267	SIRPA/RARRES2/CX3CR1/FCER1G/ITGB2/CCR1/LGALS3/BST1/PTPRO/RIPOR2/C5AR1/NOD2/SYK/FPR2/MYD88	15
BP	GO:0006757	ATP generation from ADP	10/558	115/18862	0.00219335	0.0449119	0.0387267	APP/HK3/FBP1/P2RX7/TIGAR/PKM/HDAC4/AK9/OGDH/PFKFB4	10
BP	GO:0090382	phagosome maturation	6/558	46/18862	0.00223677	0.0454751	0.0392122	MYO7A/ATP6V1E1/ATP6V0D1/RAB39A/TCIRG1/MCOLN1	6
BP	GO:0016052	carbohydrate catabolic process	14/558	197/18862	0.00225179	0.0454751	0.0392122	APP/HK3/FBP1/P2RX7/HEXB/GM2A/TIGAR/PKM/AOAH/HDAC4/CALM1/GAA/OGDH/PFKFB4	14
BP	GO:0009135	purine nucleoside diphosphate metabolic process	11/558	135/18862	0.00226275	0.0454751	0.0392122	APP/HK3/FBP1/NUDT16/P2RX7/TIGAR/PKM/HDAC4/AK9/OGDH/PFKFB4	11
BP	GO:0009179	purine ribonucleoside diphosphate metabolic process	11/558	135/18862	0.00226275	0.0454751	0.0392122	APP/HK3/FBP1/NUDT16/P2RX7/TIGAR/PKM/HDAC4/AK9/OGDH/PFKFB4	11
BP	GO:0032613	interleukin-10 production	7/558	62/18862	0.00229799	0.045645	0.0393587	CD34/VSIR/TLR4/LILRB4/TLR2/NOD2/SYK	7
BP	GO:0002312	B cell activation involved in immune response	8/558	79/18862	0.00230533	0.045645	0.0393587	NKX2-3/LGALS1/TLR4/TP53BP1/PLCL2/LFNG/CD40/CD180	8
BP	GO:0016486	peptide hormone processing	5/558	32/18862	0.00231327	0.045645	0.0393587	CES1/CTSZ/CTSL/ATP6AP2/PCSK5	5
BP	GO:0032673	regulation of interleukin-4 production	5/558	32/18862	0.00231327	0.045645	0.0393587	FCER1G/CD86/CEBPB/SYK/NLRP3	5
BP	GO:0019722	calcium-mediated signaling	14/558	198/18862	0.00235931	0.0463427	0.0399604	CX3CR1/P2RX7/CCR1/SLA2/ATP1B1/BST1/HDAC4/MCOLN1/CD4/CALM1/SYK/SLC8A1/FPR2/MAPK7	14
BP	GO:0050830	defense response to Gram-positive bacterium	9/558	98/18862	0.00247983	0.0484907	0.0418126	RARRES2/FGR/MPEG1/LYZ/RNASE6/TLR2/C5AR1/NOD2/MYD88	9
BP	GO:0042590	antigen processing and presentation of exogenous peptide antigen via MHC class I	8/558	80/18862	0.00249668	0.0486013	0.0419079	FCGR1A/FCER1G/NCF1/NCF2/FCGR1B/VAMP3/IFI30/PSMB10	8
BP	GO:0007252	I-kappaB phosphorylation	4/558	20/18862	0.00251718	0.0486324	0.0419348	SIRPA/TLR4/CX3CR1/TLR2	4
BP	GO:0046847	filopodium assembly	7/558	63/18862	0.00252069	0.0486324	0.0419348	PPP1R16B/FNBP1L/FGD4/FGD2/ARF6/RIPOR2/ARAP1	7
BP	GO:0036293	response to decreased oxygen levels	21/558	360/18862	0.0025476	0.0489343	0.0421951	CD34/CAT/PDK1/DNMT3A/CASP1/AGTRAP/TIGAR/PKM/ATP1B1/CARD16/HMOX1/TLR2/UBC/UCP2/ITPR2/LMNA/SLC8A1/SIRT2/PSMB10/EEF2K/USF1	21
BP	GO:0070482	response to oxygen levels	22/558	385/18862	0.00262224	0.0492876	0.0424997	CD34/CAT/PDK1/DNMT3A/ATP6V0D1/CASP1/AGTRAP/TIGAR/PKM/ATP1B1/CARD16/HMOX1/TLR2/UBC/UCP2/ITPR2/LMNA/SLC8A1/SIRT2/PSMB10/EEF2K/USF1	22
BP	GO:0031349	positive regulation of defense response	21/558	361/18862	0.00263245	0.0492876	0.0424997	APP/TLR4/SIGLEC16/FCER1G/HCK/GRN/LILRA2/CD1D/IL6ST/CEBPB/TLR8/NLRP12/AKIRIN2/TLR2/NOD2/SYK/POLR3G/GPSM3/NLRC4/FPR2/PSMB10	21
BP	GO:0007042	lysosomal lumen acidification	3/558	10/18862	0.00264548	0.0492876	0.0424997	GRN/ATP6AP2/PPT1	3
BP	GO:0009629	response to gravity	3/558	10/18862	0.00264548	0.0492876	0.0424997	SPARC/PTAFR/PKM	3
BP	GO:0032661	regulation of interleukin-18 production	3/558	10/18862	0.00264548	0.0492876	0.0424997	NLRP12/TLR2/NOD2	3
BP	GO:1900426	positive regulation of defense response to bacterium	3/558	10/18862	0.00264548	0.0492876	0.0424997	SIGLEC16/GRN/NOD2	3
BP	GO:1990535	neuron projection maintenance	3/558	10/18862	0.00264548	0.0492876	0.0424997	APP/ABCD1/MAP1A	3
BP	GO:0032633	interleukin-4 production	5/558	33/18862	0.00266102	0.0493653	0.0425667	FCER1G/CD86/CEBPB/SYK/NLRP3	5
BP	GO:0009185	ribonucleoside diphosphate metabolic process	11/558	138/18862	0.00268808	0.0494448	0.0426352	APP/HK3/FBP1/NUDT16/P2RX7/TIGAR/PKM/HDAC4/AK9/OGDH/PFKFB4	11
BP	GO:1903038	negative regulation of leukocyte cell-cell adhesion	11/558	138/18862	0.00268808	0.0494448	0.0426352	VSIR/CD86/LGALS3/LILRB4/CEBPB/LILRB2/FGL2/RIPOR2/LAPTM5/KLF4/ZBTB7B	11
BP	GO:0002762	negative regulation of myeloid leukocyte differentiation	6/558	48/18862	0.00278835	0.0510727	0.044039	HOXA7/TLR4/MAFB/LILRB4/CDK6/TRIB1	6
BP	GO:0050868	negative regulation of T cell activation	10/558	119/18862	0.00282028	0.0514405	0.0443561	VSIR/CD86/LGALS3/LILRB4/CEBPB/LILRB2/FGL2/RIPOR2/LAPTM5/ZBTB7B	10
BP	GO:0002065	columnar/cuboidal epithelial cell differentiation	8/558	82/18862	0.00291652	0.0529733	0.0456778	FAM20C/PTK6/IL6ST/TIGAR/CEBPB/IL31RA/CDK6/SOX4	8
BP	GO:0099515	actin filament-based transport	4/558	21/18862	0.00303755	0.0546233	0.0471006	FNBP1L/MYO7A/MYO1E/MYO1F	4
BP	GO:0045621	positive regulation of lymphocyte differentiation	9/558	101/18862	0.00304507	0.0546233	0.0471006	VSIR/CD86/LILRB4/SOX4/LILRB2/ZBTB7B/SYK/NLRP3/SOX12	9
BP	GO:0002756	MyD88-independent toll-like receptor signaling pathway	5/558	34/18862	0.00304512	0.0546233	0.0471006	TLR4/CD300LF/UBC/UBE2D1/CD40	5
BP	GO:0070997	neuron death	20/558	342/18862	0.00309915	0.0551437	0.0475493	APP/CD34/F2R/CHMP4B/TLR4/CX3CR1/CTSZ/ITGAM/GRN/ITGB2/TIGAR/CEBPB/HDAC4/PPT1/HMOX1/C5AR1/NAIP/DNAJC5/MAX/TMTC4	20
BP	GO:0032692	negative regulation of interleukin-1 production	6/558	49/18862	0.00309953	0.0551437	0.0475493	CX3CR1/LILRB4/MEFV/NLRP12/CARD16/NLRP3	6
BP	GO:0071887	leukocyte apoptotic process	9/558	102/18862	0.00325452	0.0576647	0.0497231	EFNA1/HCLS1/CTSL/ORMDL3/LGALS3/PRELID1/NOD2/TRAF3IP2/PLEKHO2	9
CC	GO:0101002	ficolin-1-rich granule	31/574	185/19520	3.55529e-15	1.68521e-12	1.4296e-12	CAT/HK3/SIRPA/ITGAX/MVP/CDA/CTSZ/FCER1G/OSTF1/GNS/GYG1/ITGB2/CTSB/DBNL/PKM/LGALS3/QPCT/ATP6AP2/LILRB2/CD93/TCIRG1/FGL2/SLC11A1/GAA/BIN2/CTSH/SERPINA1/PLEKHO2/FPR2/A1BG/CRISPLD2	31
CC	GO:0030667	secretory granule membrane	38/574	305/19520	5.60973e-14	1.32951e-11	1.12785e-11	SPARC/PTAFR/SIRPA/CD68/ITGAX/FCER1G/ITGAM/ITGB2/ORMDL3/SIRPB1/TOM1/LGALS3/RAB5C/SLCO4C1/RAB24/ATP6AP2/LILRB2/BST1/CD93/SIGLEC9/TCIRG1/PSAP/TLR2/NFAM1/CD53/HVCN1/SLC11A1/GAA/MCEMP1/C5AR1/B4GALT1/DEGS1/ITPR2/DNAJC5/STXBP5/FPR2/LPCAT1/IGF2R	38
CC	GO:0034774	secretory granule lumen	34/574	322/19520	1.24161e-10	1.93523e-08	1.6417e-08	APP/SPARC/CAT/HK3/RARRES2/MVP/CDA/CTSZ/OSTF1/HEXB/GNS/GYG1/FGR/GM2A/GRN/CFP/DBNL/PKM/QPCT/LYZ/S100A11/CPPED1/CAP1/CEP290/BIN2/TOLLIP/CTSH/SERPINA1/ERP44/A1BG/ADA2/ANXA2/CRISPLD2/HPSE	34
CC	GO:0060205	cytoplasmic vesicle lumen	34/574	326/19520	1.73208e-10	1.93523e-08	1.6417e-08	APP/SPARC/CAT/HK3/RARRES2/MVP/CDA/CTSZ/OSTF1/HEXB/GNS/GYG1/FGR/GM2A/GRN/CFP/DBNL/PKM/QPCT/LYZ/S100A11/CPPED1/CAP1/CEP290/BIN2/TOLLIP/CTSH/SERPINA1/ERP44/A1BG/ADA2/ANXA2/CRISPLD2/HPSE	34
CC	GO:0031983	vesicle lumen	34/574	328/19520	2.04139e-10	1.93523e-08	1.6417e-08	APP/SPARC/CAT/HK3/RARRES2/MVP/CDA/CTSZ/OSTF1/HEXB/GNS/GYG1/FGR/GM2A/GRN/CFP/DBNL/PKM/QPCT/LYZ/S100A11/CPPED1/CAP1/CEP290/BIN2/TOLLIP/CTSH/SERPINA1/ERP44/A1BG/ADA2/ANXA2/CRISPLD2/HPSE	34
CC	GO:0070820	tertiary granule	23/574	164/19520	5.38084e-10	4.25086e-08	3.60611e-08	PTAFR/SIRPA/ITGAX/CDA/FCER1G/ITGAM/STXBP2/CFP/ITGB2/DBNL/LGALS3/QPCT/ATP6AP2/LILRB2/LYZ/CD93/TCIRG1/CD53/SLC11A1/GAA/MCEMP1/CTSH/FPR2	23
CC	GO:0042581	specific granule	22/574	160/19520	1.87135e-09	1.26717e-07	1.07497e-07	CTSZ/ITGAM/STXBP2/CFP/ITGB2/ORMDL3/TOM1/QPCT/SLCO4C1/BST1/LYZ/CD93/CD53/HVCN1/CEP290/MCEMP1/DEGS1/DNAJC5/TOLLIP/ERP44/FPR2/HPSE	22
CC	GO:1904813	ficolin-1-rich granule lumen	19/574	124/19520	3.83658e-09	2.27317e-07	1.92839e-07	CAT/HK3/MVP/CDA/CTSZ/OSTF1/GNS/GYG1/CTSB/DBNL/PKM/QPCT/FGL2/BIN2/CTSH/SERPINA1/PLEKHO2/A1BG/CRISPLD2	19
CC	GO:0005766	primary lysosome	21/574	155/19520	5.72625e-09	2.71424e-07	2.30256e-07	CD68/STXBP2/HEXB/GNS/GM2A/GRN/TOM1/RAB5C/SLCO4C1/LYZ/CPPED1/PSAP/CAP1/NFAM1/GAA/B4GALT1/DNAJC5/TOLLIP/ADA2/ANXA2/LPCAT1	21
CC	GO:0042582	azurophil granule	21/574	155/19520	5.72625e-09	2.71424e-07	2.30256e-07	CD68/STXBP2/HEXB/GNS/GM2A/GRN/TOM1/RAB5C/SLCO4C1/LYZ/CPPED1/PSAP/CAP1/NFAM1/GAA/B4GALT1/DNAJC5/TOLLIP/ADA2/ANXA2/LPCAT1	21
CC	GO:0005775	vacuolar lumen	22/574	173/19520	8.23125e-09	3.54692e-07	3.00894e-07	PLD3/CTSL/PPT2/HEXB/GNS/GYG1/GM2A/GRN/CTSB/LYZ/CPPED1/PSAP/PPT1/CAP1/PLBD2/GAA/IFI30/ACP2/TOLLIP/ADA2/ANXA2/HPSE	22
CC	GO:0070821	tertiary granule membrane	14/574	73/19520	2.31372e-08	9.13921e-07	7.753e-07	PTAFR/SIRPA/ITGAX/FCER1G/ITGAM/ITGB2/ATP6AP2/LILRB2/CD93/CD53/SLC11A1/GAA/MCEMP1/FPR2	14
CC	GO:0043202	lysosomal lumen	15/574	96/19520	1.28816e-07	4.37687e-06	3.713e-06	PLD3/CTSL/PPT2/HEXB/GNS/GYG1/GM2A/CTSB/PSAP/PPT1/PLBD2/GAA/IFI30/ACP2/HPSE	15
CC	GO:0030139	endocytic vesicle	28/574	307/19520	1.29275e-07	4.37687e-06	3.713e-06	SPARC/FCGR1A/ATP6V0D1/NCF1/NCF2/SCIMP/MYO1E/RAB39A/CLTB/MPEG1/CD163/RAB5C/RAB24/FCGR1B/ARF6/WAS/TCIRG1/MCOLN1/TLR2/VAMP3/HVCN1/UNC93B1/SLC11A1/UBC/NOD2/SYK/RAB11FIP1/IGF2R	28
CC	GO:0101003	ficolin-1-rich granule membrane	12/574	61/19520	1.74429e-07	5.51197e-06	4.67593e-06	SIRPA/ITGAX/FCER1G/ITGB2/LGALS3/ATP6AP2/LILRB2/CD93/TCIRG1/SLC11A1/GAA/FPR2	12
CC	GO:0045335	phagocytic vesicle	17/574	136/19520	5.24165e-07	1.55284e-05	1.31731e-05	ATP6V0D1/NCF1/NCF2/SCIMP/RAB39A/MPEG1/WAS/TCIRG1/MCOLN1/TLR2/VAMP3/HVCN1/UNC93B1/SLC11A1/NOD2/SYK/RAB11FIP1	17
CC	GO:0035579	specific granule membrane	13/574	91/19520	2.52039e-06	6.91027e-05	5.86215e-05	ITGAM/ITGB2/ORMDL3/TOM1/SLCO4C1/BST1/CD93/CD53/HVCN1/MCEMP1/DEGS1/DNAJC5/FPR2	13
CC	GO:0005765	lysosomal membrane	29/574	378/19520	2.76994e-06	6.91027e-05	5.86215e-05	CD68/SORT1/MYO7A/ATP6V1E1/PLD3/ATP6V0D1/TFEB/GRN/CD1D/TOM1/RAB5C/SLCO4C1/ATP6AP2/TLR8/TCIRG1/PSAP/MCOLN1/NFAM1/LAPTM5/GAA/SLC15A3/B4GALT1/ACP2/DNAJC5/AP1S2/ABCD1/ANXA2/HPSE/LPCAT1	29
CC	GO:0098852	lytic vacuole membrane	29/574	378/19520	2.76994e-06	6.91027e-05	5.86215e-05	CD68/SORT1/MYO7A/ATP6V1E1/PLD3/ATP6V0D1/TFEB/GRN/CD1D/TOM1/RAB5C/SLCO4C1/ATP6AP2/TLR8/TCIRG1/PSAP/MCOLN1/NFAM1/LAPTM5/GAA/SLC15A3/B4GALT1/ACP2/DNAJC5/AP1S2/ABCD1/ANXA2/HPSE/LPCAT1	29
CC	GO:0001726	ruffle	18/574	175/19520	4.29192e-06	0.000101719	8.62902e-05	TLR4/S100A6/PTK6/SH3YL1/LCP1/FGR/FGD4/SCIMP/KLHL2/DBNL/MEFV/CDK6/FGD2/ALS2/ARF6/S100A11/ABCA7/HIP1R	18
CC	GO:0035577	azurophil granule membrane	10/574	58/19520	6.54578e-06	0.000147748	0.000125338	CD68/TOM1/RAB5C/SLCO4C1/PSAP/NFAM1/GAA/B4GALT1/DNAJC5/LPCAT1	10
CC	GO:0005774	vacuolar membrane	30/574	431/19520	1.28719e-05	0.000277332	0.000235267	CD68/SORT1/MYO7A/ATP6V1E1/PLD3/ATP6V0D1/TFEB/GRN/CD1D/TOM1/RAB5C/SLCO4C1/ATP6AP2/TLR8/TCIRG1/PSAP/MCOLN1/NFAM1/LAPTM5/GAA/VMP1/SLC15A3/B4GALT1/ACP2/DNAJC5/AP1S2/ABCD1/ANXA2/HPSE/LPCAT1	30
CC	GO:0031252	cell leading edge	26/574	411/19520	0.000225804	0.00464881	0.00394369	APP/UNC5A/TLR4/S100A6/PTK6/SH3YL1/LCP1/FGR/FGD4/SCIMP/KLHL2/DBNL/MEFV/VASP/CDK6/FGD2/ATP6AP2/ALS2/ARF6/S100A11/PTPRO/RIPOR2/ABCA7/ACTB/KCNC3/HIP1R	26
CC	GO:0045121	membrane raft	22/574	323/19520	0.00024519	0.00464881	0.00394369	APP/BAALC/F2R/KCNE1/EFNB1/UNC5A/ITGAM/HCK/PRKAR2B/KCNA3/ITGB2/KCNQ1/ATP1B1/EFHD2/CD4/PPT1/HMOX1/TLR2/NFAM1/MYOF/ANXA2/HPSE	22
CC	GO:0098857	membrane microdomain	22/574	323/19520	0.00024519	0.00464881	0.00394369	APP/BAALC/F2R/KCNE1/EFNB1/UNC5A/ITGAM/HCK/PRKAR2B/KCNA3/ITGB2/KCNQ1/ATP1B1/EFHD2/CD4/PPT1/HMOX1/TLR2/NFAM1/MYOF/ANXA2/HPSE	22
CC	GO:0035578	azurophil granule lumen	10/574	91/19520	0.000338829	0.00617711	0.00524019	HEXB/GNS/GM2A/GRN/LYZ/CPPED1/CAP1/TOLLIP/ADA2/ANXA2	10
CC	GO:0030670	phagocytic vesicle membrane	9/574	77/19520	0.000420507	0.00738224	0.00626252	ATP6V0D1/RAB39A/TCIRG1/MCOLN1/TLR2/VAMP3/HVCN1/SLC11A1/RAB11FIP1	9
CC	GO:0035580	specific granule lumen	8/574	62/19520	0.000444997	0.00753316	0.00639056	CTSZ/CFP/QPCT/LYZ/CEP290/TOLLIP/ERP44/HPSE	8
CC	GO:0030665	clathrin-coated vesicle membrane	11/574	117/19520	0.000672144	0.0109861	0.00931975	FCGR1A/DBNL/CLTB/FCGR1B/CD4/VAMP3/DENND1A/HIP1/DNAJC5/HIP1R/IGF2R	11
CC	GO:0005769	early endosome	23/574	378/19520	0.000867457	0.0137058	0.011627	APP/F2R/WDFY1/TLR4/FCGR1A/SORT1/PLD3/ATP6V0D1/KCNQ1/DBNL/TOM1/RAB5C/TMEM127/FCGR1B/FGD2/ALS2/ARF6/APOA2/CD4/VAMP3/ABCA7/TBC1D16/IGF2R	23
CC	GO:0001891	phagocytic cup	5/574	27/19520	0.00101987	0.0155942	0.0132289	TLR4/LCP1/MCOLN1/ABCA7/BIN2	5
CC	GO:0030666	endocytic vesicle membrane	13/574	163/19520	0.00108514	0.0160736	0.0136356	FCGR1A/ATP6V0D1/RAB39A/CD163/FCGR1B/TCIRG1/MCOLN1/TLR2/VAMP3/HVCN1/SLC11A1/UBC/RAB11FIP1	13
CC	GO:0061702	inflammasome complex	4/574	17/19520	0.00129777	0.0186406	0.0158133	CASP1/NAIP/NLRP3/NLRC4	4
CC	GO:0098858	actin-based cell projection	15/574	216/19520	0.0018906	0.0263572	0.0223594	APP/CLIC4/MYO7A/ATP6V1E1/LCP1/FGD4/SCIMP/MYO1E/VASP/ARF6/KIF13B/MYO1F/RIPOR2/B4GALT1/CDH23	15
CC	GO:0009925	basal plasma membrane	16/574	240/19520	0.00205881	0.0278822	0.0236532	CD34/SLC16A3/SLC2A9/GM2A/CD1D/KCNQ1/SLC26A6/SLCO4C1/ATP1B1/SLC1A3/C5AR1/NOD2/NAIP/B4GALT1/SLC7A7/ANXA2	16
CC	GO:0044304	main axon	7/574	62/19520	0.00222319	0.029272	0.0248321	APP/BIN1/KIF13B/C9orf72/SIRT2/CD40/MAP1A	7
CC	GO:0045177	apical part of cell	23/574	414/19520	0.00281134	0.0360155	0.0305528	APP/CD34/KCNE1/CLIC4/ITPK1/SLC16A3/MYO7A/ATP6V1E1/CTSL/SLC2A9/GM2A/CTSB/SLC26A6/ATP6AP2/ATP1B1/WDPCP/TCIRG1/PTPRO/VAMP3/HVCN1/RIPOR2/C5AR1/HIP1R	23
CC	GO:0005770	late endosome	17/574	275/19520	0.00333182	0.0415601	0.0352564	F2R/CHMP4B/CD68/PLD3/CTSL/GRN/KCNQ1/SLA2/WDR48/TCIRG1/PSAP/MCOLN1/SLC11A1/CTSH/ANXA2/IGF2R/SLC31A2	17
CC	GO:0002178	palmitoyltransferase complex	3/574	11/19520	0.00349857	0.0425211	0.0360716	ORMDL2/ORMDL3/ZDHHC9	3
CC	GO:0016324	apical plasma membrane	20/574	351/19520	0.00388917	0.045995	0.0390186	CD34/KCNE1/ITPK1/SLC16A3/MYO7A/ATP6V1E1/CTSL/SLC2A9/GM2A/CTSB/SLC26A6/ATP6AP2/ATP1B1/WDPCP/TCIRG1/PTPRO/VAMP3/HVCN1/RIPOR2/HIP1R	20
CC	GO:0016323	basolateral plasma membrane	14/574	211/19520	0.00397847	0.045995	0.0390186	SLC16A3/SLC2A9/GM2A/CD1D/KCNQ1/SLC26A6/SLCO4C1/ATP1B1/C5AR1/NOD2/NAIP/B4GALT1/SLC7A7/ANXA2	14
CC	GO:0045178	basal part of cell	16/574	258/19520	0.00420019	0.0474021	0.0402123	CD34/SLC16A3/SLC2A9/GM2A/CD1D/KCNQ1/SLC26A6/SLCO4C1/ATP1B1/SLC1A3/C5AR1/NOD2/NAIP/B4GALT1/SLC7A7/ANXA2	16
CC	GO:0030136	clathrin-coated vesicle	13/574	192/19520	0.00457201	0.0503984	0.0427542	FCGR1A/SORT1/MYO1E/DBNL/CLTB/FCGR1B/CD4/VAMP3/DENND1A/HIP1/DNAJC5/HIP1R/IGF2R	13
CC	GO:0005905	clathrin-coated pit	7/574	71/19520	0.0047966	0.0516724	0.0438349	APP/SORT1/CLTB/LRP10/ATAT1/AP1S2/HIP1R	7
CC	GO:0031256	leading edge membrane	12/574	173/19520	0.00522133	0.054998	0.0466561	UNC5A/SH3YL1/LCP1/FGR/SCIMP/VASP/FGD2/ATP6AP2/RIPOR2/ABCA7/KCNC3/HIP1R	12
CC	GO:1904724	tertiary granule lumen	6/574	55/19520	0.00538359	0.0554743	0.0470602	CDA/CFP/DBNL/QPCT/LYZ/CTSH	6
MF	GO:0140375	immune receptor activity	16/569	136/18337	5.01389e-06	0.00226075	0.00205118	IFNGR2/IFNGR1/CX3CR1/FCER1G/IL6ST/CCR1/IL31RA/IL13RA1/FCGR1B/LILRB2/CD4/IL17RA/C5AR1/CSF2RA/CTSH/FPR2	16
MF	GO:0019865	immunoglobulin binding	7/569	24/18337	5.83418e-06	0.00226075	0.00205118	FCGR1A/FCER1G/LILRA2/LGALS3/FCGR1B/CD4/FCGR2C	7
MF	GO:0035325	Toll-like receptor binding	5/569	12/18337	1.86828e-05	0.00482639	0.00437898	TLR2/UNC93B1/SYK/TOLLIP/MYD88	5
MF	GO:0016176	superoxide-generating NADPH oxidase activator activity	4/569	10/18337	0.000165968	0.0321564	0.0291755	NCF1/NCF2/NCF1B/NCF1C	4
MF	GO:0019864	IgG binding	4/569	11/18337	0.000254417	0.0394346	0.035779	FCGR1A/FCER1G/FCGR1B/FCGR2C	4

## Sheet: Supplementary Table 11
Supplementary Table 11. 316 genes with p-value < 0.05 by univariate Cox regression analysis of 829 overlap genes.
id	HR	HR.95L	HR.95H	pvalue
HOXA7	1.25481	1.06594	1.47715	0.00638702
HOXB6	1.16324	1.03212	1.31103	0.013212
PPP1R16B	1.21761	1.00208	1.47949	0.0476043
CD300LB	1.15909	1.02187	1.31472	0.0216427
AL022722.1	0.824322	0.685439	0.991346	0.0401414
NRG4	1.26591	1.03053	1.55505	0.0246735
HTR7	1.3987	1.1497	1.70162	0.000794454
PCBD1	1.47526	1.07088	2.03235	0.0173642
BCAT1	1.17851	1.00484	1.3822	0.0434526
PARL	0.59646	0.362599	0.981153	0.041862
AC004080.5	1.46044	1.09451	1.94872	0.0100639
F2R	1.18138	1.00251	1.39218	0.0466095
VSIR	1.26555	1.09393	1.4641	0.00153782
HOXB.AS3	1.13385	1.01129	1.27126	0.0313775
ATG3	1.40713	1.02523	1.93129	0.0345002
KCNE1	1.3462	1.11316	1.62803	0.00217403
ORMDL2	1.92444	1.04061	3.55895	0.0369001
DNMT3A	0.612563	0.42604	0.880747	0.00816002
SERINC2	1.2706	1.07801	1.49761	0.00429515
TATDN2P2	0.639718	0.464709	0.880635	0.00615427
CHMP4B	1.68748	1.07939	2.63817	0.0217312
BCKDHB	0.641208	0.433702	0.947995	0.0259023
HK3	1.1023	1.0039	1.21034	0.0411867
PQLC2	1.70851	1.24164	2.35094	0.0010057
PHF5CP	0.65654	0.432753	0.996054	0.0478659
XBP1P1	0.646752	0.442856	0.944523	0.0241119
ITGA7	1.28335	1.05735	1.55767	0.0115973
VDR	1.27438	1.06259	1.52838	0.0089329
ZNF461	0.615695	0.386979	0.979586	0.0406567
ITPK1	1.89775	1.33293	2.7019	0.000379003
PRICKLE1	1.29282	1.00447	1.66394	0.046087
IFNGR1	1.2639	1.01127	1.57964	0.0395497
ZNF439	0.669631	0.536862	0.835236	0.000375432
METTL7B	1.32481	1.16149	1.51109	2.78691e-05
SLC16A3	1.27131	1.02353	1.57907	0.0299911
LGALS1	1.30295	1.1417	1.48697	8.63936e-05
SEC23B	1.89529	1.26337	2.84328	0.00200374
SGMS2	1.19863	1.01489	1.41562	0.0328352
AEBP1	0.837085	0.713367	0.982258	0.0293063
ZNF43	0.615095	0.467314	0.80961	0.000527341
AL359715.1	0.517335	0.359739	0.743971	0.000377302
ITGAX	1.25882	1.09763	1.44367	0.000992841
PPM1M	1.34491	1.06158	1.70387	0.014088
CD300C	1.17223	1.03078	1.33308	0.015431
MVP	1.50923	1.18948	1.91494	0.000703128
ARPC1B	1.3191	1.00774	1.72666	0.0437903
ZNF253	0.737643	0.556921	0.977011	0.0338242
HCLS1	1.57053	1.10045	2.24142	0.0128687
CX3CR1	1.1151	1.00962	1.2316	0.0316538
SORT1	1.26561	1.11799	1.43273	0.000197306
S100A4	1.41979	1.20137	1.67792	3.91347e-05
AC011477.2	0.670542	0.504436	0.891346	0.0059239
MIPEPP3	0.713628	0.579786	0.878369	0.0014538
TARSL2	0.571379	0.384839	0.848338	0.00550978
SDHB	2.97886	1.75268	5.06289	5.49399e-05
MYO7A	1.31995	1.07094	1.62685	0.00925293
AL359715.2	0.534248	0.343324	0.831346	0.0054581
ATP6V1E1	2.1373	1.15547	3.95341	0.0155004
MFSD2A	1.40085	1.10363	1.77811	0.00559912
TBC1D32	0.604512	0.394478	0.926376	0.0208271
ITGAM	1.18874	1.04635	1.35051	0.00791011
AC004067.1	0.656742	0.487115	0.885437	0.00581384
S100A6	1.2585	1.07916	1.46766	0.00337734
HCK	1.22741	1.06157	1.41917	0.00566409
MRPS31P5	0.533573	0.342052	0.832331	0.00562372
PRKAR2B	1.21276	1.04389	1.40895	0.0116886
KIAA1147	0.672616	0.520017	0.869995	0.00252127
MOB3A	1.46325	1.06124	2.01754	0.0201974
ZNF254	0.543878	0.389618	0.759213	0.000345415
UNC119	1.34678	1.01977	1.77867	0.0359142
PLAGL1	0.76634	0.597296	0.983225	0.0363484
HKR1	0.551923	0.360948	0.843943	0.00608752
SHKBP1	1.37329	1.00681	1.87317	0.0451967
ZNF493	0.626186	0.458759	0.854717	0.00318894
BNIP3P27	0.687195	0.523142	0.902693	0.00702688
CDC42EP3	1.34123	1.11404	1.61475	0.00193257
SH3YL1	0.497163	0.324537	0.761609	0.0013211
CRIP1	1.46385	1.15239	1.85949	0.00179607
IL1RN	1.20476	1.04311	1.39147	0.0112722
LINC01353	2.19331	1.19656	4.02039	0.0110732
AC087273.2	1.86439	1.09596	3.1716	0.0215615
LCP1	1.38624	1.04341	1.8417	0.0242501
LINC00539	0.794378	0.676857	0.932305	0.00483124
GPR132	1.4063	1.09987	1.7981	0.00654649
TFEB	1.51264	1.21499	1.88322	0.000214097
CAPZA1	1.67477	1.03198	2.71793	0.036854
NCF2	1.16664	1.03462	1.3155	0.0118901
GYG1	1.43903	1.02389	2.0225	0.0360898
FGR	1.15558	1.03754	1.28706	0.00853188
EIF4E2	2.17321	1.08818	4.34013	0.0278487
ZNF382	0.66516	0.457634	0.966795	0.0326022
DOK2	1.32673	1.12464	1.56513	0.000798936
LILRA1	1.16364	1.02822	1.31689	0.0163556
CASP1	1.25658	1.04379	1.51275	0.015835
CD1D	1.1441	1.01841	1.28531	0.0233812
ZNF529	0.668826	0.468568	0.954672	0.0267282
KLHL2	1.40404	1.02487	1.92348	0.0346068
ZNF385A	1.26727	1.05962	1.51562	0.00948092
DHRS9	1.3091	1.12761	1.51979	0.000404277
MYO1E	1.43931	1.07724	1.92308	0.013769
MRPS31P4	0.604174	0.405459	0.90028	0.0132793
LRRC25	1.12825	1.00653	1.2647	0.038293
ITGB2	1.23462	1.0616	1.43585	0.00622138
KCNQ1	1.29905	1.08741	1.55187	0.00393163
AC073349.2	0.61969	0.456401	0.841401	0.00216518
SHF	0.694802	0.499574	0.966323	0.030502
AC093520.2	1.26933	1.03659	1.55433	0.0210183
GMCL1	0.511077	0.329227	0.793371	0.00277566
CCR1	1.13869	1.00746	1.287	0.0376206
TIGAR	1.4545	1.07018	1.97682	0.0167004
YPEL1	0.662035	0.476698	0.919429	0.013845
IPO5P1	0.724914	0.528852	0.993664	0.0455573
CPQ	1.61957	1.16663	2.24837	0.00396657
ZNF197.AS1	0.651157	0.454998	0.931884	0.0189914
PKM	1.38906	1.04464	1.84702	0.0237988
TNFAIP2	1.1768	1.03158	1.34246	0.0154067
AC008870.2	0.526093	0.314645	0.87964	0.0143276
AL359715.3	0.577533	0.388764	0.857961	0.00655603
ENPP7P10	0.533665	0.381159	0.747191	0.00025501
SMARCC1	0.62749	0.408058	0.964922	0.033787
LST1	1.29027	1.10285	1.50956	0.00146084
ZNF566	0.686007	0.472045	0.996949	0.0481564
ITGB2.AS1	1.17539	1.02362	1.34965	0.0219655
CLTB	1.86248	1.28395	2.70168	0.00104938
LINC01271	32.0777	1.18407	869.019	0.0393665
LILRB4	1.23356	1.08753	1.39919	0.00109341
AC079766.1	0.407631	0.23121	0.718665	0.00192307
CEBPB	1.21268	1.0224	1.43837	0.0268081
MPEG1	1.0861	1.00361	1.17538	0.0404331
CD163	1.10394	1.01005	1.20655	0.0292193
RAB5C	1.69846	1.07964	2.67199	0.0219386
CASTOR2	0.645364	0.481815	0.86443	0.00331431
AL591848.4	0.660745	0.531996	0.820652	0.000178662
AC008739.2	0.729532	0.555772	0.957617	0.0230881
ZNF445	0.577135	0.400684	0.83129	0.00315281
AC092279.2	0.5664	0.428215	0.749177	6.78425e-05
CYTL1	0.857734	0.781894	0.94093	0.00115796
RPL7AP10	0.529131	0.384585	0.728004	9.23087e-05
ZC3HAV1L	0.719665	0.551107	0.939778	0.0156855
AC060780.1	0.726492	0.545662	0.967249	0.0286709
CDK6	0.778437	0.632978	0.957323	0.0176338
FGD2	1.17781	1.02898	1.34817	0.0175733
ALS2	0.727688	0.581212	0.911079	0.00557038
LILRB2	1.14703	1.03273	1.27398	0.0104295
OGFR	1.48938	1.02317	2.16801	0.0375672
AC007279.1	0.57298	0.390789	0.840111	0.00434087
WDPCP	0.463027	0.240607	0.891057	0.0211487
WDR48	0.473026	0.281983	0.7935	0.00456363
SMARCAD1	0.618567	0.427714	0.89458	0.0107182
ARF6	2.14472	1.40205	3.28078	0.000434605
EFHD2	1.46536	1.12943	1.90121	0.0040259
AC019206.1	0.483711	0.32361	0.723021	0.000398033
TFE3	1.80848	1.24941	2.61771	0.00168892
C1QTNF3	0.437146	0.296417	0.644688	2.9846e-05
WAS	1.7956	1.27663	2.52552	0.00077031
TAF9P3	0.678185	0.501261	0.917557	0.0118083
RPGRIP1L	0.433169	0.226446	0.82861	0.0114692
CCDC88B	1.27875	1.03935	1.5733	0.0200804
TCIRG1	1.24667	1.03241	1.5054	0.0219392
MS4A6A	1.11717	1.01148	1.2339	0.0288781
SLC43A2	1.21033	1.01356	1.44529	0.0349633
IRAK1BP1	0.544536	0.36808	0.805586	0.00235108
CD300LF	1.28488	1.0547	1.56529	0.0128186
CARD16	1.29083	1.03767	1.60575	0.0219078
ZNF431	0.626821	0.444204	0.884513	0.00785142
CD4	1.19474	1.03286	1.38198	0.0166099
LINC00663	0.331765	0.159714	0.68916	0.00309576
GALNT1	0.497118	0.347405	0.71135	0.000131913
ZNF429	0.726921	0.546854	0.96628	0.0280806
BBS1	0.503878	0.271918	0.933713	0.029414
MED21	0.559104	0.390575	0.800352	0.00148923
AL139400.1	0.55407	0.350858	0.874979	0.0113135
AC007556.1	1.24119	1.03453	1.48915	0.0200591
CAP1	2.24602	1.54836	3.25803	2.01098e-05
BNIP3P10	0.579779	0.347212	0.968122	0.0371774
GLTP	1.7415	1.12115	2.70509	0.0135521
SPRYD3	2.20968	1.27909	3.81733	0.0044773
CDKN2D	1.29419	1.01365	1.65236	0.0385735
AL139353.2	0.444513	0.262119	0.753825	0.00262443
TIA1	0.644281	0.446224	0.930246	0.0189871
PTPRO	1.33428	1.04479	1.704	0.0208296
DET1	0.469652	0.283807	0.777192	0.00327366
LINC01503	1.28763	1.0066	1.64711	0.0441849
GCC2.AS1	0.469596	0.27402	0.804758	0.00595403
AL009028.1	0.731255	0.546606	0.978282	0.0350454
C8orf37	0.582749	0.36434	0.932086	0.0242303
VAMP3	1.65105	1.01323	2.69038	0.0441438
RNPEPL1	1.60774	1.17162	2.20622	0.00327223
KDM5B	0.680999	0.537994	0.862016	0.00140026
SAMHD1	1.16626	1.03651	1.31224	0.0105889
LINC02175	0.682798	0.547783	0.851091	0.000688004
RIPOR2	1.30762	1.04863	1.63057	0.0172372
SNRPCP16	0.629127	0.47235	0.837939	0.00152937
PLBD2	1.52203	1.12375	2.06147	0.00665278
ZNF248	0.623595	0.423083	0.919135	0.0170334
SERF1B	0.0758784	0.017843	0.322678	0.000480338
PMS2P4	0.371323	0.2136	0.645509	0.000445698
UNC93B1	1.46213	1.17778	1.81512	0.000575396
AL132657.1	0.468998	0.258184	0.851948	0.0129163
JPH4	2.16416	1.49693	3.1288	4.04429e-05
LAPTM5	1.46215	1.10386	1.93675	0.00807534
CEP290	0.618794	0.420706	0.910151	0.0147608
PRELID1	1.9799	1.35263	2.89806	0.000441743
CALM1	1.8058	1.14507	2.84781	0.0109972
SATB1.AS1	0.712583	0.508514	0.998547	0.049021
AC073534.2	0.643995	0.472737	0.877294	0.00527188
C16orf96	0.515593	0.309107	0.860014	0.0111591
Z94721.2	0.338418	0.165102	0.693674	0.00308869
AP002807.1	1.35385	1.02341	1.79099	0.0338333
AC006538.1	0.584554	0.414501	0.824372	0.00220537
SCML2P2	0.718298	0.593788	0.868916	0.000657683
ZBTB12	0.545624	0.369333	0.806063	0.00234391
ACOT9	1.68601	1.17059	2.42835	0.00501433
ZNF138	0.626318	0.458105	0.856298	0.00336619
ZMAT1	0.574506	0.428319	0.770586	0.000216103
RN7SL280P	0.765864	0.590249	0.99373	0.0447186
TASP1	0.538434	0.352435	0.822594	0.00419464
TLK2P2	0.583747	0.391781	0.869773	0.0081514
NAPSB	1.21311	1.07461	1.36945	0.00178806
SEPHS1P1	0.511851	0.323892	0.808885	0.00412604
AC098934.3	0.608231	0.482312	0.767023	2.65639e-05
LRRC37A17P	0.645086	0.43186	0.96359	0.0322647
ETV6	0.570254	0.402644	0.807635	0.00156084
SFXN3	1.66783	1.30352	2.13396	4.74205e-05
LPCAT3	2.67015	1.61057	4.42684	0.000140303
ARAP1	1.44772	1.11498	1.87977	0.00549057
SSBP2	0.759854	0.606033	0.952719	0.0173287
AC010320.3	0.58678	0.387804	0.887847	0.0116384
SMAP2	1.34732	1.0415	1.74295	0.0232392
SYK	1.50694	1.07287	2.11663	0.0179933
POLR3G	0.631474	0.42745	0.932881	0.0209474
ZRANB3	0.61784	0.384394	0.993061	0.0467318
KCNIP4	0.426245	0.230098	0.789597	0.00670847
AK9	0.477201	0.301711	0.754767	0.00156302
B4GALT1	1.42813	1.00983	2.01971	0.0438751
AC023421.2	0.518737	0.36982	0.727619	0.000143676
LRP10	1.38477	1.0383	1.84687	0.0267083
ASB2	2.39026	1.47136	3.88306	0.00043173
UCP2	1.80007	1.35963	2.38319	4.03049e-05
DEGS1	1.8932	1.14495	3.13045	0.0128643
HIP1	1.49346	1.22025	1.82785	9.98778e-05
AC008507.2	0.610301	0.419649	0.88757	0.00976331
BX470102.1	1.71202	1.15364	2.54065	0.00759424
MYOF	1.22182	1.06834	1.39735	0.00344348
S100A5	2.77979	1.28512	6.01285	0.00939789
ZNF627	0.675007	0.475419	0.958385	0.0279752
SLC25A39P1	0.578309	0.436398	0.766368	0.000137677
EPB41L2	1.25625	1.06572	1.48084	0.00656003
ITPR2	0.543422	0.411811	0.717094	1.63074e-05
MAP3K6	1.49816	1.1734	1.9128	0.00118426
BIN2	1.66837	1.19189	2.33532	0.00285428
RBM28	0.638562	0.412651	0.98815	0.0440648
DDX3P1	0.614226	0.422185	0.893622	0.0108364
LMNA	1.20842	1.05652	1.38215	0.00574187
CCND3	2.1104	1.55583	2.86265	1.57423e-06
SLC8A1	1.27804	1.02694	1.59055	0.027941
CARF	0.596264	0.382426	0.929673	0.0225035
ACSM3	0.79533	0.685608	0.922611	0.00249942
KCNC3	1.43742	1.138	1.81563	0.00232956
HIP1R	0.762397	0.591751	0.982254	0.0358637
MAX	0.547746	0.343569	0.873262	0.0114247
INO80C	0.45803	0.274467	0.764358	0.00280417
INPP1	1.67487	1.03778	2.70306	0.0347019
ELL2P1	5.19696	1.52381	17.7242	0.0084666
DCUN1D4	0.528023	0.325102	0.857604	0.00985893
TPM3	3.44857	1.79995	6.60717	0.000190179
GPSM3	1.43887	1.02676	2.0164	0.0345729
TRAF3IP2	0.636886	0.435705	0.930961	0.019843
AL132657.2	0.646082	0.424359	0.983653	0.0416686
MARCH6	0.593378	0.365587	0.963102	0.0346773
ZNF660	0.666423	0.49798	0.891842	0.00633421
ABCD1	1.63861	1.20487	2.22851	0.0016444
PLEKHO2	1.39904	1.01849	1.92178	0.0381661
AC133552.4	0.733896	0.611258	0.88114	0.000912029
CDH23	1.37135	1.00436	1.87245	0.0468849
ZNF443	0.54084	0.361341	0.809507	0.00281746
SARS	2.28246	1.19202	4.37043	0.0127769
AC006012.1	0.40757	0.193171	0.859929	0.0184681
ZNF554	0.550348	0.313335	0.966644	0.0377088
STXBP5	0.676409	0.51959	0.880556	0.00367025
SIRT2	2.18498	1.31019	3.64387	0.00274144
A1BG	0.445895	0.269104	0.738829	0.00171989
ACER3	1.50665	1.08038	2.1011	0.0157103
FTH1P8	1.331	1.02905	1.72154	0.0293971
AL021368.2	0.539623	0.297214	0.979741	0.0426397
ARHGAP30	1.75647	1.22505	2.51841	0.00218349
ZNF117	0.724583	0.552332	0.950553	0.020012
AC021321.1	0.550605	0.382606	0.79237	0.00131336
RBPMS2P1	0.519819	0.360211	0.750149	0.000472043
RHBDF2	1.43326	1.1479	1.78955	0.00148485
MICAL1	1.43178	1.12938	1.81515	0.0030255
C1orf54	1.80023	1.2805	2.5309	0.000718241
AC060780.2	0.623967	0.454795	0.856065	0.00346549
TMTC4	0.513886	0.304121	0.868333	0.0128661
ZNF738	0.619543	0.426371	0.900234	0.012031
RCOR3	0.357364	0.185992	0.686636	0.00201314
LPCAT1	1.58876	1.13763	2.2188	0.0065957
AL591848.1	0.526148	0.379652	0.729171	0.000114795
CD180	1.21955	1.05563	1.40893	0.00703738
PACRGL	0.392717	0.22099	0.697889	0.00144208
HNRNPA1P62	0.657312	0.467478	0.924235	0.0158186
IGF2R	1.21672	1.04318	1.41911	0.0124738
PRKRA.AS1	0.56648	0.395634	0.811102	0.00191486
PSMB10	1.68526	1.08961	2.60654	0.0189938
KLF13	1.87287	1.24549	2.81629	0.00257253
AC133552.3	0.684679	0.46898	0.999585	0.049749
AL590652.1	0.750824	0.568246	0.992064	0.0437982
CBR1	2.37352	1.77021	3.18244	7.61945e-09
CD37	1.61925	1.19082	2.20181	0.00211385
ZNF107	0.672822	0.523328	0.86502	0.00199474
TMPRSS6	8.94509	1.97825	40.4472	0.00442561
AC006116.9	0.288631	0.135875	0.61312	0.00122678
RPS6P25	0.497957	0.320118	0.774594	0.00198139
AC022098.2	1.60078	1.13774	2.25226	0.00691908
NADK2	0.597441	0.403921	0.883679	0.00990434
SH3BGRL3	1.51135	1.18458	1.92825	0.000891167

## Sheet: Supplementary Table 12
Supplementary Table 12. Necroptosisscore that quantifies the necroptosis related genes signatures in 151 AML patients.
id	necroptosisscore
TCGA.AB.2949.03B	-4.97952
TCGA.AB.2943.03A	-1.54289
TCGA.AB.2851.03A	22.8318
TCGA.AB.2822.03A	-16.9156
TCGA.AB.2939.03A	-6.84801
TCGA.AB.2931.03A	-1.63838
TCGA.AB.2921.03A	7.76725
TCGA.AB.2937.03A	-13.9732
TCGA.AB.2917.03A	-2.80161
TCGA.AB.2849.03A	-17.1544
TCGA.AB.2990.03B	-9.92762
TCGA.AB.3007.03A	-23.1111
TCGA.AB.2948.03A	18.9065
TCGA.AB.2971.03A	9.63668
TCGA.AB.2955.03A	-14.8068
TCGA.AB.2892.03A	6.64434
TCGA.AB.2898.03A	-2.74006
TCGA.AB.2857.03A	-3.27477
TCGA.AB.2995.03A	-10.5535
TCGA.AB.2928.03A	-13.1758
TCGA.AB.2913.03A	-14.8486
TCGA.AB.2866.03A	21.1938
TCGA.AB.2927.03A	4.86509
TCGA.AB.2870.03A	8.70214
TCGA.AB.2956.03A	21.6179
TCGA.AB.3002.03A	-3.61241
TCGA.AB.2834.03A	10.94
TCGA.AB.2875.03A	-11.0527
TCGA.AB.2901.03A	-4.60255
TCGA.AB.2858.03A	-14.9437
TCGA.AB.2853.03A	-2.95991
TCGA.AB.2846.03A	5.47228
TCGA.AB.2994.03A	-3.40864
TCGA.AB.2977.03B	8.74239
TCGA.AB.2991.03A	-19.0762
TCGA.AB.2886.03A	-17.808
TCGA.AB.2806.03A	-17.7203
TCGA.AB.2873.03A	24.2526
TCGA.AB.2885.03A	-5.33228
TCGA.AB.2876.03A	-10.722
TCGA.AB.2999.03B	-23.0837
TCGA.AB.2982.03B	-20.5183
TCGA.AB.2815.03A	11.6984
TCGA.AB.2810.03A	-8.69047
TCGA.AB.2941.03A	-5.91044
TCGA.AB.2896.03B	0.810762
TCGA.AB.3009.03A	-9.75643
TCGA.AB.2859.03A	0.160825
TCGA.AB.2934.03A	14.3143
TCGA.AB.2919.03A	-17.8185
TCGA.AB.3000.03A	-4.6475
TCGA.AB.2973.03A	23.9452
TCGA.AB.2924.03A	15.2677
TCGA.AB.2915.03A	11.5545
TCGA.AB.2952.03B	10.4535
TCGA.AB.2938.03A	-3.90281
TCGA.AB.2935.03A	9.52644
TCGA.AB.2823.03A	-11.9012
TCGA.AB.2814.03A	-10.9714
TCGA.AB.2899.03A	7.38916
TCGA.AB.3001.03A	-16.0835
TCGA.AB.2813.03A	18.9287
TCGA.AB.2942.03A	2.03893
TCGA.AB.2930.03A	-1.47464
TCGA.AB.2811.03B	8.95992
TCGA.AB.2842.03A	12.3356
TCGA.AB.2911.03A	14.1521
TCGA.AB.2825.03A	27.2171
TCGA.AB.2920.03B	-5.78925
TCGA.AB.2998.03A	-7.89393
TCGA.AB.2916.03A	21.355
TCGA.AB.2839.03A	-8.05115
TCGA.AB.2965.03A	13.0581
TCGA.AB.2944.03A	-5.54384
TCGA.AB.2861.03A	12.1034
TCGA.AB.2843.03A	7.82534
TCGA.AB.2933.03A	9.97203
TCGA.AB.2894.03A	7.15103
TCGA.AB.2888.03B	20.5736
TCGA.AB.2900.03A	15.4323
TCGA.AB.2966.03A	-16.8115
TCGA.AB.2963.03A	5.9155
TCGA.AB.2975.03A	-7.66959
TCGA.AB.2881.03A	2.87011
TCGA.AB.2950.03A	-15.9521
TCGA.AB.2821.03A	-2.40671
TCGA.AB.2912.03A	6.2452
TCGA.AB.2890.03A	5.07909
TCGA.AB.2812.03A	-8.90517
TCGA.AB.2817.03A	4.00979
TCGA.AB.2970.03A	7.16405
TCGA.AB.2984.03A	-18.2212
TCGA.AB.2946.03A	0.318272
TCGA.AB.2828.03A	14.1696
TCGA.AB.2845.03B	-4.3223
TCGA.AB.2883.03A	-4.32315
TCGA.AB.2959.03A	-8.46823
TCGA.AB.2893.03A	21.6875
TCGA.AB.2863.03A	-10.7216
TCGA.AB.2871.03A	-7.1967
TCGA.AB.2979.03B	-9.52747
TCGA.AB.2987.03A	27.78
TCGA.AB.2891.03A	5.79031
TCGA.AB.2820.03A	-2.97324
TCGA.AB.2897.03A	-19.3496
TCGA.AB.2884.03A	16.9476
TCGA.AB.2882.03A	-0.999429
TCGA.AB.2981.03B	29.4829
TCGA.AB.2877.03A	-14.637
TCGA.AB.2918.03A	1.37454
TCGA.AB.2889.03A	2.63993
TCGA.AB.2808.03A	-2.14172
TCGA.AB.2983.03A	1.22649
TCGA.AB.2830.03A	0.0203238
TCGA.AB.2929.03A	1.7767
TCGA.AB.2836.03A	20.4465
TCGA.AB.2910.03A	11.777
TCGA.AB.2856.03A	12.3886
TCGA.AB.2844.03A	1.97454
TCGA.AB.2908.03A	-6.50571
TCGA.AB.2940.03A	-1.62001
TCGA.AB.2869.03A	-6.94667
TCGA.AB.2996.03A	2.54285
TCGA.AB.2867.03A	-1.95336
TCGA.AB.2826.03A	18.2625
TCGA.AB.2872.03A	-17.6426
TCGA.AB.2840.03A	-14.1488
TCGA.AB.3008.03A	-13.0085
TCGA.AB.2992.03A	10.0878
TCGA.AB.3011.03A	-12.6544
TCGA.AB.2914.03A	-2.6628
TCGA.AB.2818.03A	16.307
TCGA.AB.2986.03A	-5.68192
TCGA.AB.2847.03A	-4.54172
TCGA.AB.2805.03A	15.8641
TCGA.AB.2819.03A	-11.9291
TCGA.AB.2988.03B	-0.31635
TCGA.AB.2841.03B	-13.6355
TCGA.AB.2976.03A	-4.38372
TCGA.AB.2895.03A	-6.96251
TCGA.AB.3012.03A	-22.3468
TCGA.AB.2874.03A	-8.69382
TCGA.AB.2862.03A	-21.8194
TCGA.AB.2980.03A	-22.4235
TCGA.AB.2865.03A	7.74551
TCGA.AB.2835.03A	22.5123
TCGA.AB.2878.03A	-10.1961
TCGA.AB.2936.03A	-6.16232
TCGA.AB.2880.03A	-1.3385
TCGA.AB.2932.03A	24.0733
TCGA.AB.2925.03A	17.4921

## Sheet: Supplementary Table 14
Supplementary Table 14. Spearman analysis between immune cells and the necroptosisscore.
Variable	necroptosisscore	Activated.B.cell	Activated.CD4.T.cell	Activated.CD8.T.cell	Activated.dendritic.cell	CD56bright.tural.killer.cell	CD56dim.tural.killer.cell	Eosinophil	Gamma.delta.T.cell	Immature..B.cell	Immature.dendritic.cell	MDSC	Macrophage	Mast.cell	Monocyte	Natural.killer.T.cell	Natural.killer.cell	Neutrophil	Plasmacytoid.dendritic.cell	Regulatory.T.cell	T.follicular.helper.cell	Type.1.T.helper.cell	Type.17.T.helper.cell	Type.2.T.helper.cell
necroptosisscore	1	0.223998	0.037512	-0.0293635	0.755157	0.0449935	0.287435	0.517568	0.622211	0.623919	0.318283	0.811855	0.869401	0.473158	0.76647	0.507642	0.498608	0.726748	0.720019	0.676576	0.744568	0.458792	0.244891	0.219758
Activated.B.cell	0.223998	1	0.496469	0.590999	0.420374	0.30752	0.441536	0.223443	0.392353	0.761123	0.115947	0.431997	0.225315	0.177764	0.293917	0.553022	0.490164	0.234685	0.248762	0.451347	0.509476	0.53696	0.280384	0.381097
Activated.CD4.T.cell	0.037512	0.496469	1	0.560787	0.288832	0.428158	0.198126	0.193192	0.414602	0.417379	0.0851653	0.262055	0.125856	0.189643	-0.010497	0.442938	0.43553	0.171322	0.0932832	0.256266	0.313804	0.413402	0.190453	0.578238
Activated.CD8.T.cell	-0.0293635	0.590999	0.560787	1	0.174806	0.524772	0.445726	-0.017203	0.250012	0.413744	0.105195	0.25233	0.0758122	0.162764	0.122062	0.60561	0.406205	0.135622	0.122052	0.170743	0.28284	0.571902	0.363909	0.113271
Activated.dendritic.cell	0.755157	0.420374	0.288832	0.174806	1	0.322163	0.398981	0.54922	0.717614	0.767056	0.465728	0.86476	0.795304	0.663356	0.691219	0.619686	0.676328	0.803059	0.743998	0.781012	0.833952	0.641989	0.490686	0.332558
CD56bright.tural.killer.cell	0.0449935	0.30752	0.428158	0.524772	0.322163	1	0.353404	0.0773416	0.440413	0.254252	0.345801	0.319298	0.302431	0.419558	0.22519	0.494183	0.409992	0.255967	0.360081	0.29856	0.312936	0.592528	0.363022	0.325462
CD56dim.tural.killer.cell	0.287435	0.441536	0.198126	0.445726	0.398981	0.353404	1	0.096531	0.393914	0.43684	0.410251	0.486887	0.378865	0.381197	0.587003	0.644588	0.506674	0.338835	0.396275	0.477065	0.472638	0.533932	0.460411	-0.0813774
Eosinophil	0.517568	0.223443	0.193192	-0.017203	0.54922	0.0773416	0.096531	1	0.428821	0.499862	0.318279	0.584111	0.489368	0.556525	0.40868	0.340055	0.385737	0.474419	0.377077	0.531995	0.547173	0.265679	0.140676	0.309707
Gamma.delta.T.cell	0.622211	0.392353	0.414602	0.250012	0.717614	0.440413	0.393914	0.428821	1	0.636037	0.445511	0.71227	0.741989	0.614652	0.643894	0.619784	0.706867	0.655574	0.620389	0.701691	0.700322	0.64365	0.463799	0.380396
Immature..B.cell	0.623919	0.761123	0.417379	0.413744	0.767056	0.254252	0.43684	0.499862	0.636037	1	0.318883	0.802988	0.623416	0.504654	0.595063	0.631316	0.628507	0.620456	0.567472	0.743499	0.807068	0.663634	0.397822	0.380482
Immature.dendritic.cell	0.318283	0.115947	0.0851653	0.105195	0.465728	0.345801	0.410251	0.318279	0.445511	0.318883	1	0.533414	0.488043	0.654192	0.522162	0.45884	0.408842	0.602152	0.500106	0.53679	0.397606	0.518426	0.410816	0.0931509
MDSC	0.811855	0.431997	0.262055	0.25233	0.86476	0.319298	0.486887	0.584111	0.71227	0.802988	0.533414	1	0.840634	0.743839	0.789738	0.689203	0.624995	0.84221	0.747495	0.860456	0.87869	0.717591	0.432486	0.304428
Macrophage	0.869401	0.225315	0.125856	0.0758122	0.795304	0.302431	0.378865	0.489368	0.741989	0.623416	0.488043	0.840634	1	0.676269	0.811054	0.557268	0.580256	0.819534	0.817175	0.706504	0.734346	0.571831	0.43745	0.172285
Mast.cell	0.473158	0.177764	0.189643	0.162764	0.663356	0.419558	0.381197	0.556525	0.614652	0.504654	0.654192	0.743839	0.676269	1	0.617934	0.536976	0.512257	0.738881	0.584591	0.668204	0.59285	0.568967	0.492266	0.146777
Monocyte	0.76647	0.293917	-0.010497	0.122062	0.691219	0.22519	0.587003	0.40868	0.643894	0.595063	0.522162	0.789738	0.811054	0.617934	1	0.593784	0.537444	0.694014	0.663523	0.746436	0.727395	0.559659	0.393553	0.0290599
Natural.killer.T.cell	0.507642	0.553022	0.442938	0.60561	0.619686	0.494183	0.644588	0.340055	0.619784	0.631316	0.45884	0.689203	0.557268	0.536976	0.593784	1	0.735113	0.545769	0.52332	0.608529	0.687048	0.711459	0.522241	0.244494
Natural.killer.cell	0.498608	0.490164	0.43553	0.406205	0.676328	0.409992	0.506674	0.385737	0.706867	0.628507	0.408842	0.624995	0.580256	0.512257	0.537444	0.735113	1	0.56051	0.571687	0.603473	0.726383	0.626455	0.527472	0.304802
Neutrophil	0.726748	0.234685	0.171322	0.135622	0.803059	0.255967	0.338835	0.474419	0.655574	0.620456	0.602152	0.84221	0.819534	0.738881	0.694014	0.545769	0.56051	1	0.728355	0.725365	0.688192	0.614436	0.518801	0.163698
Plasmacytoid.dendritic.cell	0.720019	0.248762	0.0932832	0.122052	0.743998	0.360081	0.396275	0.377077	0.620389	0.567472	0.500106	0.747495	0.817175	0.584591	0.663523	0.52332	0.571687	0.728355	1	0.64211	0.726504	0.624395	0.417135	0.231071
Regulatory.T.cell	0.676576	0.451347	0.256266	0.170743	0.781012	0.29856	0.477065	0.531995	0.701691	0.743499	0.53679	0.860456	0.706504	0.668204	0.746436	0.608529	0.603473	0.725365	0.64211	1	0.821903	0.69271	0.325465	0.413689
T.follicular.helper.cell	0.744568	0.509476	0.313804	0.28284	0.833952	0.312936	0.472638	0.547173	0.700322	0.807068	0.397606	0.87869	0.734346	0.59285	0.727395	0.687048	0.726383	0.688192	0.726504	0.821903	1	0.691455	0.340718	0.396702
Type.1.T.helper.cell	0.458792	0.53696	0.413402	0.571902	0.641989	0.592528	0.533932	0.265679	0.64365	0.663634	0.518426	0.717591	0.571831	0.568967	0.559659	0.711459	0.626455	0.614436	0.624395	0.69271	0.691455	1	0.474796	0.373794
Type.17.T.helper.cell	0.244891	0.280384	0.190453	0.363909	0.490686	0.363022	0.460411	0.140676	0.463799	0.397822	0.410816	0.432486	0.43745	0.492266	0.393553	0.522241	0.527472	0.518801	0.417135	0.325465	0.340718	0.474796	1	-0.0822631
Type.2.T.helper.cell	0.219758	0.381097	0.578238	0.113271	0.332558	0.325462	-0.0813774	0.309707	0.380396	0.380482	0.0931509	0.304428	0.172285	0.146777	0.0290599	0.244494	0.304802	0.163698	0.231071	0.413689	0.396702	0.373794	-0.0822631	1
